# Supplementary material for: Two Receptors, Two Isoforms, Two Cancers: Comprehensive Analysis of KIT and TrkA Expression in Neuroblastoma and Acute Myeloid Leukemia
Source: Front Oncol. 2019 Oct 18;9:1046. doi: 10.3389/fonc.2019.01046 (PMC6813278; doi:10.3389/fonc.2019.01046)
Supplement: Supplementary Table 1 — Coordinates for all data sets used for 2D-plot of KIT vs NTRK1 expression. [file Table_1.XLSX]

## Sheet: KIT vs TrkA
#Program: R2: Genomics analysis and visualization platform
#Website: http://r2.amc.nl
#Developer: Jan Koster (jankoster@amc.uva.nl)
#Support: r2-support@amc.uva.nl
#Describe: 2D distribution data by dataset
#Date: 2019-06-01 ()
#H:dataset	KIT	x-se	TrkA	y-se	annot
ps_avgpres_all92_u133p2	3.70642	0.184564	2.00783	0.141917	R:0.091<br>R-pval:0.387<br>
ps_avgpres_all98_u133p2	4.33028	0.169503	2.14093	0.151751	R:0.222<br>R-pval:0.028<br>
ps_avgpres_allcog207_u133p2	5.32181	0.0986486	2.89061	0.113655	R:0.102<br>R-pval:0.143<br>
ps_avgpres_aml179_u133p2	9.00527	0.0981012	2.66148	0.150925	R:0.050<br>R-pval:0.508<br>
ps_avgpres_aml22_u133p2	7.1191	0.730666	2.7341	0.454555	R:0.029<br>R-pval:0.898<br>
ps_avgpres_aml79_u133p2	8.30008	0.191687	1.95989	0.185593	R:0.073<br>R-pval:0.525<br>
ps_avgpres_bmmyeloma78_u133p2	6.10417	0.312976	2.99802	0.168282	R:-0.553<br>R-pval:1.55e-07<br>
ps_avgpres_brainglioma153_u133p2	6.40563	0.101401	1.00172	0.0596464	R:0.005<br>R-pval:0.954<br>
ps_avgpres_em733ebi188_u133p2	6.3703	0.108852	6.85458	0.137212	R:0.218<br>R-pval:2.70e-03<br>
ps_avgpres_emtab2358ebi30_u133p2	7.64306	0.146176	1.44649	0.188835	R:-0.158<br>R-pval:0.403<br>
ps_avgpres_gse10524geo40_u133p2	4.15711	0.18489	1.76042	0.125242	R:0.217<br>R-pval:0.179<br>
ps_avgpres_gse10846geo420_u133p2	4.20723	0.0654383	1.61228	0.0664071	R:-0.093<br>R-pval:0.057<br>
ps_avgpres_gse111678geo260_u133p2	8.17729	0.10055	2.37537	0.107405	R:0.114<br>R-pval:0.067<br>
ps_avgpres_gse12453geo67_u133p2	3.11822	0.165815	2.78984	0.171511	R:0.123<br>R-pval:0.322<br>
ps_avgpres_gse13811geo18_u133p2	1.39799	0.309258	1.42508	0.266649	R:0.085<br>R-pval:0.736<br>
ps_avgpres_gse14468geo525_u133p2	8.50711	0.0894458	2.95795	0.0826943	R:0.195<br>R-pval:6.70e-06<br>
ps_avgpres_gse14880geo34_u133p2	6.53336	0.24821	6.8311	0.461902	R:-0.116<br>R-pval:0.512<br>
ps_avgpres_gse15434geo251_u133p2	7.88455	0.096388	3.04129	0.112248	R:0.186<br>R-pval:3.06e-03<br>
ps_avgpres_gse16011geo284_u133p2	5.93813	0.0895354	1.25159	0.0797108	R:-0.042<br>R-pval:0.485<br>
ps_avgpres_gse16024gpl970geo14_u133p2	5.85122	0.29476	2.06161	0.33599	R:-0.242<br>R-pval:0.405<br>
ps_avgpres_gse17855geo237_u133p2	7.60547	0.114042	3.14747	0.133161	R:0.217<br>R-pval:7.68e-04<br>
ps_avgpres_gse17920geo130_u133p2	5.32802	0.111286	3.17017	0.147308	R:-0.066<br>R-pval:0.457<br>
ps_avgpres_gse19067geo44_u133p2	4.85243	0.247552	1.42339	0.196389	R:0.194<br>R-pval:0.208<br>
ps_avgpres_gse19404geo24_u133p2	6.26837	0.364082	2.29565	0.363941	R:0.229<br>R-pval:0.282<br>
ps_avgpres_gse19578geo53_u133p2	6.12846	0.238657	1.34714	0.177438	R:0.321<br>R-pval:0.019<br>
ps_avgpres_gse20874geo20_u133p2	5.17379	0.301277	2.06311	0.328022	R:0.048<br>R-pval:0.842<br>
ps_avgpres_gse21029geo62_u133p2	1.5706	0.152395	0.829054	0.11824	R:-0.035<br>R-pval:0.786<br>
ps_avgpres_gse21261geo96_u133p2	7.6436	0.17442	2.74289	0.163165	R:0.161<br>R-pval:0.117<br>
ps_avgpres_gse22845geo154_u133p2	8.07255	0.114579	2.30667	0.133984	R:0.032<br>R-pval:0.696<br>
ps_avgpres_gse26576geo37_u133p2	6.25778	0.192857	1.88561	0.237921	R:-0.085<br>R-pval:0.617<br>
ps_avgpres_gse26673geo16_u133p2	4.19449	0.459123	1.97732	0.384697	R:0.358<br>R-pval:0.173<br>
ps_avgpres_gse26713geo124_u133p2	4.0007	0.1685	2.18058	0.144448	R:0.163<br>R-pval:0.070<br>
ps_avgpres_gse31312geo498_u133p2	3.58927	0.0891695	3.59167	0.0789558	R:0.088<br>R-pval:0.050<br>
ps_avgpres_gse34771geo34_u133p2	4.25849	0.286449	1.6698	0.284428	R:0.262<br>R-pval:0.134<br>
ps_avgpres_gse36245geo46_u133p2	6.34575	0.242024	0.915041	0.155672	R:-0.144<br>R-pval:0.340<br>
ps_avgpres_gse36907geo46_u133p2	3.23567	0.250218	0.814556	0.121525	R:-0.056<br>R-pval:0.710<br>
ps_avgpres_gse37418geo76_u133p2	6.14848	0.164653	2.40503	0.219983	R:0.058<br>R-pval:0.622<br>
ps_avgpres_gse37642geo140_u133p2	8.37007	0.135039	2.71172	0.163727	R:0.226<br>R-pval:7.35e-03<br>
ps_avgpres_gse38885geo65_u133p2	4.4371	0.153216	0.901954	0.135774	R:-0.102<br>R-pval:0.418<br>
ps_avgpres_gse39671geo130_u133p2	2.39981	0.102876	1.47852	0.109137	R:-0.022<br>R-pval:0.804<br>
ps_avgpres_gse43378geo50_u133p2	6.52285	0.195591	1.4581	0.262993	R:-0.128<br>R-pval:0.376<br>
ps_avgpres_gse49243geo73_u133p2	7.22979	0.132622	3.07869	0.265787	R:0.193<br>R-pval:0.102<br>
ps_avgpres_gse50774geo21_u133p2	7.50591	0.201878	0.584895	0.214193	R:-0.168<br>R-pval:0.466<br>
ps_avgpres_gse51521geo20_u133p2	5.99785	0.217118	1.67205	0.195583	R:-0.085<br>R-pval:0.720<br>
ps_avgpres_gse53733geo70_u133p2	6.00022	0.12263	1.03484	0.163037	R:-0.040<br>R-pval:0.743<br>
ps_avgpres_gse56314geo33_u133p2	0.569603	0.21653	1.10977	0.159445	R:0.203<br>R-pval:0.256<br>
ps_avgpres_gse56315geo122_u133p2	3.64186	0.173481	1.48167	0.0666338	R:-0.051<br>R-pval:0.576<br>
ps_avgpres_gse58445geo193_u133p2	5.02515	0.101054	2.39171	0.131473	R:0.055<br>R-pval:0.450<br>
ps_avgpres_gse61578geo26_u133p2	3.26892	0.319906	1.54094	0.365445	R:-0.011<br>R-pval:0.956<br>
ps_avgpres_gse67066geo51_u133p2	6.10413	0.17935	6.31325	0.263745	R:0.416<br>R-pval:2.39e-03<br>
ps_avgpres_gse67851geo31_u133p2	5.88136	0.345016	2.20823	0.374115	R:0.349<br>R-pval:0.054<br>
ps_avgpres_gse68720geo97_u133p2	4.93249	0.156997	2.23105	0.175629	R:0.173<br>R-pval:0.090<br>
ps_avgpres_gse6891geo460_u133p2	8.48758	0.0966473	2.97732	0.0891215	R:0.196<br>R-pval:2.26e-05<br>
ps_avgpres_gse73038geo182_u133p2	7.05688	0.116519	1.36772	0.138395	R:0.039<br>R-pval:0.597<br>
ps_avgpres_gse74195geo51_u133p2	6.06091	0.250292	1.56184	0.211205	R:-0.022<br>R-pval:0.878<br>
ps_avgpres_gse7696geo84_u133p2	6.00257	0.131702	0.968562	0.0934876	R:-0.054<br>R-pval:0.626<br>
ps_avgpres_gse81183geo42_u133p2	3.91803	0.23671	1.85872	0.235144	R:0.253<br>R-pval:0.107<br>
ps_avgpres_gse87371geo223_u133p2	4.8519	0.0860351	1.12302	0.0461089	R:0.019<br>R-pval:0.773<br>
ps_avgpres_gse93261geo149_u133p2	6.13089	0.054274	0.382843	0.0598422	R:0.191<br>R-pval:0.020<br>
ps_avgpres_gse93291geob122_u133p2	5.32624	0.101088	1.52203	0.123817	R:0.013<br>R-pval:0.884<br>
ps_avgpres_mb500affym223_u133p2	6.77841	0.0985064	2.32215	0.145753	R:0.064<br>R-pval:0.338<br>
ps_avgpres_mbdelatrepublic57_u133p2	7.01282	0.171031	1.74298	0.240447	R:-0.314<br>R-pval:0.017<br>
ps_avgpres_medullokool62_u133p2	6.60843	0.171794	2.79796	0.290388	R:0.361<br>R-pval:3.93e-03<br>
ps_avgpres_myeloma542_u133p2	6.94287	0.115197	2.16133	0.0509463	R:-0.054<br>R-pval:0.207<br>
ps_avgpres_nbadam88_u133p2	6.32244	0.156223	7.03639	0.291448	R:-0.450<br>R-pval:1.09e-05<br>
ps_avgpres_nbdelatre64_u133p2	6.55828	0.201446	6.73545	0.339911	R:-0.157<br>R-pval:0.215<br>
ps_avgpres_nbhiyama51_u133p2	5.36399	0.172667	7.87251	0.29407	R:-0.291<br>R-pval:0.038<br>
ps_avgpres_nblastowska30_u133p2	6.16911	0.299766	5.75183	0.597316	R:-0.317<br>R-pval:0.088<br>

## Sheet: Лист2
all92	all92	3.70642	0.184564	2.00783	0.141917	R:0.091<br>R-pval:0.387<br>
all98	all98	4.33028	0.169503	2.14093	0.151751	R:0.222<br>R-pval:0.028<br>
all207	all207	5.32181	0.0986486	2.89061	0.113655	R:0.102<br>R-pval:0.143<br>
aml179	aml179	9.00527	0.0981012	2.66148	0.150925	R:0.050<br>R-pval:0.508<br>
aml22	aml22	7.1191	0.730666	2.7341	0.454555	R:0.029<br>R-pval:0.898<br>
aml79	aml79	8.30008	0.191687	1.95989	0.185593	R:0.073<br>R-pval:0.525<br>
myeloma78	myeloma78	6.10417	0.312976	2.99802	0.168282	R:-0.553<br>R-pval:1.55e-07<br>
glioma153	glioma153	6.40563	0.101401	1.00172	0.0596464	R:0.005<br>R-pval:0.954<br>
PP188	PP188	6.3703	0.108852	6.85458	0.137212	R:0.218<br>R-pval:2.70e-03<br>
	ps_avgpres_emtab2358ebi30_u133p2	7.64306	0.146176	1.44649	0.188835	R:-0.158<br>R-pval:0.403<br>
	ps_avgpres_gse10524geo40_u133p2	4.15711	0.18489	1.76042	0.125242	R:0.217<br>R-pval:0.179<br>
	ps_avgpres_gse10846geo420_u133p2	4.20723	0.0654383	1.61228	0.0664071	R:-0.093<br>R-pval:0.057<br>
aml260	aml260	8.17729	0.10055	2.37537	0.107405	R:0.114<br>R-pval:0.067<br>
	ps_avgpres_gse12453geo67_u133p2	3.11822	0.165815	2.78984	0.171511	R:0.123<br>R-pval:0.322<br>
	ps_avgpres_gse13811geo18_u133p2	1.39799	0.309258	1.42508	0.266649	R:0.085<br>R-pval:0.736<br>
aml525	aml525	8.50711	0.0894458	2.95795	0.0826943	R:0.195<br>R-pval:6.70e-06<br>
NB34	NB34	6.53336	0.24821	6.8311	0.461902	R:-0.116<br>R-pval:0.512<br>
aml251	aml251	7.88455	0.096388	3.04129	0.112248	R:0.186<br>R-pval:3.06e-03<br>
	ps_avgpres_gse16011geo284_u133p2	5.93813	0.0895354	1.25159	0.0797108	R:-0.042<br>R-pval:0.485<br>
	ps_avgpres_gse16024gpl970geo14_u133p2	5.85122	0.29476	2.06161	0.33599	R:-0.242<br>R-pval:0.405<br>
aml237	aml237	7.60547	0.114042	3.14747	0.133161	R:0.217<br>R-pval:7.68e-04<br>
	ps_avgpres_gse17920geo130_u133p2	5.32802	0.111286	3.17017	0.147308	R:-0.066<br>R-pval:0.457<br>
	ps_avgpres_gse19067geo44_u133p2	4.85243	0.247552	1.42339	0.196389	R:0.194<br>R-pval:0.208<br>
	ps_avgpres_gse19404geo24_u133p2	6.26837	0.364082	2.29565	0.363941	R:0.229<br>R-pval:0.282<br>
	ps_avgpres_gse19578geo53_u133p2	6.12846	0.238657	1.34714	0.177438	R:0.321<br>R-pval:0.019<br>
	ps_avgpres_gse20874geo20_u133p2	5.17379	0.301277	2.06311	0.328022	R:0.048<br>R-pval:0.842<br>
	ps_avgpres_gse21029geo62_u133p2	1.5706	0.152395	0.829054	0.11824	R:-0.035<br>R-pval:0.786<br>
aml96	aml96	7.6436	0.17442	2.74289	0.163165	R:0.161<br>R-pval:0.117<br>
aml154	aml154	8.07255	0.114579	2.30667	0.133984	R:0.032<br>R-pval:0.696<br>
	ps_avgpres_gse26576geo37_u133p2	6.25778	0.192857	1.88561	0.237921	R:-0.085<br>R-pval:0.617<br>
	ps_avgpres_gse26673geo16_u133p2	4.19449	0.459123	1.97732	0.384697	R:0.358<br>R-pval:0.173<br>
	ps_avgpres_gse26713geo124_u133p2	4.0007	0.1685	2.18058	0.144448	R:0.163<br>R-pval:0.070<br>
	ps_avgpres_gse31312geo498_u133p2	3.58927	0.0891695	3.59167	0.0789558	R:0.088<br>R-pval:0.050<br>
	ps_avgpres_gse34771geo34_u133p2	4.25849	0.286449	1.6698	0.284428	R:0.262<br>R-pval:0.134<br>
	ps_avgpres_gse36245geo46_u133p2	6.34575	0.242024	0.915041	0.155672	R:-0.144<br>R-pval:0.340<br>
	ps_avgpres_gse36907geo46_u133p2	3.23567	0.250218	0.814556	0.121525	R:-0.056<br>R-pval:0.710<br>
	ps_avgpres_gse37418geo76_u133p2	6.14848	0.164653	2.40503	0.219983	R:0.058<br>R-pval:0.622<br>
aml140	aml140	8.37007	0.135039	2.71172	0.163727	R:0.226<br>R-pval:7.35e-03<br>
	ps_avgpres_gse38885geo65_u133p2	4.4371	0.153216	0.901954	0.135774	R:-0.102<br>R-pval:0.418<br>
	ps_avgpres_gse39671geo130_u133p2	2.39981	0.102876	1.47852	0.109137	R:-0.022<br>R-pval:0.804<br>
	ps_avgpres_gse43378geo50_u133p2	6.52285	0.195591	1.4581	0.262993	R:-0.128<br>R-pval:0.376<br>
	ps_avgpres_gse49243geo73_u133p2	7.22979	0.132622	3.07869	0.265787	R:0.193<br>R-pval:0.102<br>
	ps_avgpres_gse50774geo21_u133p2	7.50591	0.201878	0.584895	0.214193	R:-0.168<br>R-pval:0.466<br>
	ps_avgpres_gse51521geo20_u133p2	5.99785	0.217118	1.67205	0.195583	R:-0.085<br>R-pval:0.720<br>
	ps_avgpres_gse53733geo70_u133p2	6.00022	0.12263	1.03484	0.163037	R:-0.040<br>R-pval:0.743<br>
	ps_avgpres_gse56314geo33_u133p2	0.569603	0.21653	1.10977	0.159445	R:0.203<br>R-pval:0.256<br>
	ps_avgpres_gse56315geo122_u133p2	3.64186	0.173481	1.48167	0.0666338	R:-0.051<br>R-pval:0.576<br>
	ps_avgpres_gse58445geo193_u133p2	5.02515	0.101054	2.39171	0.131473	R:0.055<br>R-pval:0.450<br>
	ps_avgpres_gse61578geo26_u133p2	3.26892	0.319906	1.54094	0.365445	R:-0.011<br>R-pval:0.956<br>
PP51	PP51	6.10413	0.17935	6.31325	0.263745	R:0.416<br>R-pval:2.39e-03<br>
	ps_avgpres_gse67851geo31_u133p2	5.88136	0.345016	2.20823	0.374115	R:0.349<br>R-pval:0.054<br>
all97	all97	4.93249	0.156997	2.23105	0.175629	R:0.173<br>R-pval:0.090<br>
aml460	aml460	8.48758	0.0966473	2.97732	0.0891215	R:0.196<br>R-pval:2.26e-05<br>
	ps_avgpres_gse73038geo182_u133p2	7.05688	0.116519	1.36772	0.138395	R:0.039<br>R-pval:0.597<br>
	ps_avgpres_gse74195geo51_u133p2	6.06091	0.250292	1.56184	0.211205	R:-0.022<br>R-pval:0.878<br>
	ps_avgpres_gse7696geo84_u133p2	6.00257	0.131702	0.968562	0.0934876	R:-0.054<br>R-pval:0.626<br>
	ps_avgpres_gse81183geo42_u133p2	3.91803	0.23671	1.85872	0.235144	R:0.253<br>R-pval:0.107<br>
	ps_avgpres_gse87371geo223_u133p2	4.8519	0.0860351	1.12302	0.0461089	R:0.019<br>R-pval:0.773<br>
	ps_avgpres_gse93261geo149_u133p2	6.13089	0.054274	0.382843	0.0598422	R:0.191<br>R-pval:0.020<br>
	ps_avgpres_gse93291geob122_u133p2	5.32624	0.101088	1.52203	0.123817	R:0.013<br>R-pval:0.884<br>
MB223	MB223	6.77841	0.0985064	2.32215	0.145753	R:0.064<br>R-pval:0.338<br>
MB57	MB57	7.01282	0.171031	1.74298	0.240447	R:-0.314<br>R-pval:0.017<br>
MB62	MB62	6.60843	0.171794	2.79796	0.290388	R:0.361<br>R-pval:3.93e-03<br>
myeloma542	myeloma542	6.94287	0.115197	2.16133	0.0509463	R:-0.054<br>R-pval:0.207<br>
NB88	NB88	6.32244	0.156223	7.03639	0.291448	R:-0.450<br>R-pval:1.09e-05<br>
NB64	NB64	6.55828	0.201446	6.73545	0.339911	R:-0.157<br>R-pval:0.215<br>
NB51	NB51	5.36399	0.172667	7.87251	0.29407	R:-0.291<br>R-pval:0.038<br>
NB30	NB30	6.16911	0.299766	5.75183	0.597316	R:-0.317<br>R-pval:0.088<br>

## Sheet: SCF vs NGF
	#Program: R2: Genomics analysis and visualization platform
	#Website: http://r2.amc.nl
	#Developer: Jan Koster (jankoster@amc.uva.nl)
	#Support: r2-support@amc.uva.nl
	#Describe: 2D distribution data by dataset
	#Date: 2019-06-01 ()
	#H:dataset	SCF	x-se	NGF	y-se	annot
all92	ps_avgpres_all92_u133p2	3.22537	0.159599	3.0195	0.104451	R:0.404<br>R-pval:6.49e-05<br>
all98	ps_avgpres_all98_u133p2	3.84142	0.156788	3.34079	0.119266	R:0.218<br>R-pval:0.031<br>
all207	ps_avgpres_allcog207_u133p2	4.16129	0.104274	4.11751	0.0923322	R:0.283<br>R-pval:3.72e-05<br>
aml179	ps_avgpres_aml179_u133p2	3.89056	0.113246	3.20188	0.0907409	R:0.038<br>R-pval:0.613<br>
aml22	ps_avgpres_aml22_u133p2	2.79285	0.564246	1.55056	0.273029	R:0.366<br>R-pval:0.094<br>
aml79	ps_avgpres_aml79_u133p2	3.78893	0.203109	1.96215	0.131446	R:-0.135<br>R-pval:0.236<br>
myeloma78	ps_avgpres_bmmyeloma78_u133p2	4.95179	0.177393	3.55091	0.0896541	R:0.207<br>R-pval:0.069<br>
glioma153	ps_avgpres_brainglioma153_u133p2	8.0238	0.0535689	3.51083	0.0834934	R:0.003<br>R-pval:0.974<br>
PP188	ps_avgpres_em733ebi188_u133p2	6.46017	0.0941542	3.65415	0.0754431	R:0.452<br>R-pval:7.45e-11<br>
	ps_avgpres_emtab2358ebi30_u133p2	8.42202	0.13644	3.28438	0.206696	R:0.341<br>R-pval:0.065<br>
	ps_avgpres_gse10524geo40_u133p2	5.30928	0.127177	2.9224	0.154393	R:0.089<br>R-pval:0.586<br>
	ps_avgpres_gse10846geo420_u133p2	5.74914	0.0610661	2.80847	0.0598814	R:0.006<br>R-pval:0.907<br>
aml260	ps_avgpres_gse111678geo260_u133p2	3.28934	0.117871	2.47887	0.0739781	R:-0.048<br>R-pval:0.441<br>
	ps_avgpres_gse12453geo67_u133p2	4.49018	0.199275	4.39116	0.156706	R:0.151<br>R-pval:0.223<br>
	ps_avgpres_gse13811geo18_u133p2	1.96841	0.321548	2.79792	0.243324	R:-0.046<br>R-pval:0.857<br>
aml525	ps_avgpres_gse14468geo525_u133p2	3.49333	0.0707366	2.75987	0.036348	R:0.093<br>R-pval:0.032<br>
NB34	ps_avgpres_gse14880geo34_u133p2	6.91515	0.270875	3.8905	0.21759	R:0.460<br>R-pval:6.22e-03<br>
aml251	ps_avgpres_gse15434geo251_u133p2	3.40202	0.121768	2.451	0.0791692	R:-0.079<br>R-pval:0.210<br>
	ps_avgpres_gse16011geo284_u133p2	8.32304	0.0520053	2.93004	0.0696642	R:0.053<br>R-pval:0.375<br>
	ps_avgpres_gse16024gpl970geo14_u133p2	6.54471	0.167905	3.61825	0.280967	R:0.517<br>R-pval:0.058<br>
aml237	ps_avgpres_gse17855geo237_u133p2	3.67991	0.112269	2.96759	0.0814937	R:0.125<br>R-pval:0.054<br>
	ps_avgpres_gse17920geo130_u133p2	7.36805	0.0781186	3.23704	0.127201	R:0.099<br>R-pval:0.260<br>
	ps_avgpres_gse19067geo44_u133p2	4.92735	0.37616	2.97231	0.246426	R:0.202<br>R-pval:0.188<br>
	ps_avgpres_gse19404geo24_u133p2	8.26294	0.31168	4.39245	0.343788	R:0.017<br>R-pval:0.936<br>
	ps_avgpres_gse19578geo53_u133p2	7.82401	0.141996	3.00394	0.172403	R:0.100<br>R-pval:0.477<br>
	ps_avgpres_gse20874geo20_u133p2	6.12174	0.283777	3.17322	0.186809	R:0.524<br>R-pval:0.018<br>
	ps_avgpres_gse21029geo62_u133p2	1.39518	0.174493	2.49378	0.124446	R:-0.046<br>R-pval:0.724<br>
aml96	ps_avgpres_gse21261geo96_u133p2	3.48123	0.189442	2.32755	0.122218	R:-0.024<br>R-pval:0.819<br>
aml154	ps_avgpres_gse22845geo154_u133p2	3.49387	0.157431	2.6133	0.0990726	R:-0.085<br>R-pval:0.293<br>
	ps_avgpres_gse26576geo37_u133p2	7.39965	0.0910928	3.57585	0.216294	R:0.198<br>R-pval:0.241<br>
	ps_avgpres_gse26673geo16_u133p2	5.68184	0.367048	2.84466	0.258341	R:0.354<br>R-pval:0.179<br>
	ps_avgpres_gse26713geo124_u133p2	3.08326	0.134516	3.01946	0.0873134	R:0.337<br>R-pval:1.27e-04<br>
	ps_avgpres_gse31312geo498_u133p2	5.16417	0.0885236	4.16659	0.0692695	R:-0.036<br>R-pval:0.428<br>
	ps_avgpres_gse34771geo34_u133p2	5.72998	0.206352	2.5946	0.232106	R:0.098<br>R-pval:0.580<br>
	ps_avgpres_gse36245geo46_u133p2	8.20393	0.18648	0.923028	0.126876	R:0.109<br>R-pval:0.472<br>
	ps_avgpres_gse36907geo46_u133p2	2.6545	0.20801	2.78505	0.198115	R:0.066<br>R-pval:0.661<br>
	ps_avgpres_gse37418geo76_u133p2	7.93049	0.162569	3.65545	0.18497	R:-0.047<br>R-pval:0.685<br>
aml140	ps_avgpres_gse37642geo140_u133p2	3.70031	0.135412	1.94094	0.105184	R:0.062<br>R-pval:0.469<br>
	ps_avgpres_gse38885geo65_u133p2	5.66649	0.13678	2.06838	0.134097	R:0.140<br>R-pval:0.267<br>
	ps_avgpres_gse39671geo130_u133p2	2.70549	0.122859	2.80495	0.095383	R:0.122<br>R-pval:0.166<br>
	ps_avgpres_gse43378geo50_u133p2	9.10164	0.110774	2.99317	0.126946	R:0.151<br>R-pval:0.297<br>
	ps_avgpres_gse49243geo73_u133p2	10.0684	0.159998	1.88865	0.177496	R:0.152<br>R-pval:0.201<br>
	ps_avgpres_gse50774geo21_u133p2	7.95197	0.200032	1.53307	0.188733	R:0.200<br>R-pval:0.386<br>
	ps_avgpres_gse51521geo20_u133p2	6.79391	0.180804	1.98691	0.177759	R:0.312<br>R-pval:0.181<br>
	ps_avgpres_gse53733geo70_u133p2	8.00166	0.0802309	2.57824	0.146034	R:-0.014<br>R-pval:0.907<br>
	ps_avgpres_gse56314geo33_u133p2	0.345963	0.101186	2.19857	0.158458	R:-0.097<br>R-pval:0.590<br>
	ps_avgpres_gse56315geo122_u133p2	4.27856	0.21494	2.50029	0.09031	R:0.020<br>R-pval:0.829<br>
	ps_avgpres_gse58445geo193_u133p2	6.67419	0.0856352	2.82057	0.0973039	R:0.148<br>R-pval:0.039<br>
	ps_avgpres_gse61578geo26_u133p2	5.32655	0.320554	2.46835	0.285153	R:0.152<br>R-pval:0.458<br>
PP51	ps_avgpres_gse67066geo51_u133p2	7.15525	0.159038	4.02134	0.161768	R:0.375<br>R-pval:6.77e-03<br>
	ps_avgpres_gse67851geo31_u133p2	7.93388	0.239242	3.19652	0.231783	R:0.059<br>R-pval:0.753<br>
all97	ps_avgpres_gse68720geo97_u133p2	3.68243	0.191441	3.77932	0.125476	R:0.362<br>R-pval:2.68e-04<br>
aml460	ps_avgpres_gse6891geo460_u133p2	3.50779	0.074091	2.72975	0.0393598	R:0.107<br>R-pval:0.022<br>
	ps_avgpres_gse73038geo182_u133p2	8.47379	0.102064	1.81364	0.109115	R:0.005<br>R-pval:0.946<br>
	ps_avgpres_gse74195geo51_u133p2	8.02109	0.193464	3.7829	0.166566	R:0.094<br>R-pval:0.511<br>
	ps_avgpres_gse7696geo84_u133p2	8.64563	0.093174	2.9823	0.123994	R:0.087<br>R-pval:0.430<br>
	ps_avgpres_gse81183geo42_u133p2	5.68208	0.213496	3.04609	0.253275	R:0.208<br>R-pval:0.186<br>
	ps_avgpres_gse87371geo223_u133p2	6.05887	0.063926	1.72317	0.0505963	R:0.055<br>R-pval:0.415<br>
	ps_avgpres_gse93261geo149_u133p2	7.09412	0.0404841	1.494	0.0949355	R:-0.125<br>R-pval:0.128<br>
	ps_avgpres_gse93291geob122_u133p2	5.98496	0.08451	2.80421	0.115957	R:-0.030<br>R-pval:0.741<br>
MB223	ps_avgpres_mb500affym223_u133p2	8.65826	0.0945353	2.46272	0.109184	R:-0.033<br>R-pval:0.621<br>
MB57	ps_avgpres_mbdelatrepublic57_u133p2	7.98439	0.220654	3.31997	0.189865	R:-0.034<br>R-pval:0.800<br>
MB62	ps_avgpres_medullokool62_u133p2	8.12276	0.200554	4.10534	0.214198	R:-0.027<br>R-pval:0.835<br>
myeloma542	ps_avgpres_myeloma542_u133p2	4.12073	0.0691018	3.34748	0.04059	R:0.228<br>R-pval:8.42e-08<br>
NB88	ps_avgpres_nbadam88_u133p2	7.1036	0.0947024	3.83207	0.122298	R:0.159<br>R-pval:0.139<br>
NB64	ps_avgpres_nbdelatre64_u133p2	7.00721	0.178668	3.90224	0.168184	R:0.416<br>R-pval:6.36e-04<br>
NB51	ps_avgpres_nbhiyama51_u133p2	7.27284	0.0960559	4.4595	0.156828	R:0.035<br>R-pval:0.805<br>
NB30	ps_avgpres_nblastowska30_u133p2	6.73831	0.180928	3.68823	0.191605	R:-0.045<br>R-pval:0.814<br>

## Sheet: Лист4
	#H:dataset	x	x-se	y	y-se	annot
all92	all92	3.22537	0.159599	3.0195	0.104451	R:0.404<br>R-pval:6.49e-05<br>
all98	all98	3.84142	0.156788	3.34079	0.119266	R:0.218<br>R-pval:0.031<br>
all207	all207	4.16129	0.104274	4.11751	0.0923322	R:0.283<br>R-pval:3.72e-05<br>
aml179	aml179	3.89056	0.113246	3.20188	0.0907409	R:0.038<br>R-pval:0.613<br>
aml22	aml22	2.79285	0.564246	1.55056	0.273029	R:0.366<br>R-pval:0.094<br>
aml79	aml79	3.78893	0.203109	1.96215	0.131446	R:-0.135<br>R-pval:0.236<br>
myeloma78	myeloma78	4.95179	0.177393	3.55091	0.0896541	R:0.207<br>R-pval:0.069<br>
glioma153	glioma153	8.0238	0.0535689	3.51083	0.0834934	R:0.003<br>R-pval:0.974<br>
PP188	PP188	6.46017	0.0941542	3.65415	0.0754431	R:0.452<br>R-pval:7.45e-11<br>
	ps_avgpres_emtab2358ebi30_u133p2	8.42202	0.13644	3.28438	0.206696	R:0.341<br>R-pval:0.065<br>
	ps_avgpres_gse10524geo40_u133p2	5.30928	0.127177	2.9224	0.154393	R:0.089<br>R-pval:0.586<br>
	ps_avgpres_gse10846geo420_u133p2	5.74914	0.0610661	2.80847	0.0598814	R:0.006<br>R-pval:0.907<br>
aml260	aml260	3.28934	0.117871	2.47887	0.0739781	R:-0.048<br>R-pval:0.441<br>
	ps_avgpres_gse12453geo67_u133p2	4.49018	0.199275	4.39116	0.156706	R:0.151<br>R-pval:0.223<br>
	ps_avgpres_gse13811geo18_u133p2	1.96841	0.321548	2.79792	0.243324	R:-0.046<br>R-pval:0.857<br>
aml525	aml525	3.49333	0.0707366	2.75987	0.036348	R:0.093<br>R-pval:0.032<br>
NB34	NB34	6.91515	0.270875	3.8905	0.21759	R:0.460<br>R-pval:6.22e-03<br>
aml251	aml251	3.40202	0.121768	2.451	0.0791692	R:-0.079<br>R-pval:0.210<br>
	ps_avgpres_gse16011geo284_u133p2	8.32304	0.0520053	2.93004	0.0696642	R:0.053<br>R-pval:0.375<br>
	ps_avgpres_gse16024gpl970geo14_u133p2	6.54471	0.167905	3.61825	0.280967	R:0.517<br>R-pval:0.058<br>
aml237	aml237	3.67991	0.112269	2.96759	0.0814937	R:0.125<br>R-pval:0.054<br>
	ps_avgpres_gse17920geo130_u133p2	7.36805	0.0781186	3.23704	0.127201	R:0.099<br>R-pval:0.260<br>
	ps_avgpres_gse19067geo44_u133p2	4.92735	0.37616	2.97231	0.246426	R:0.202<br>R-pval:0.188<br>
	ps_avgpres_gse19404geo24_u133p2	8.26294	0.31168	4.39245	0.343788	R:0.017<br>R-pval:0.936<br>
	ps_avgpres_gse19578geo53_u133p2	7.82401	0.141996	3.00394	0.172403	R:0.100<br>R-pval:0.477<br>
	ps_avgpres_gse20874geo20_u133p2	6.12174	0.283777	3.17322	0.186809	R:0.524<br>R-pval:0.018<br>
	ps_avgpres_gse21029geo62_u133p2	1.39518	0.174493	2.49378	0.124446	R:-0.046<br>R-pval:0.724<br>
aml96	aml96	3.48123	0.189442	2.32755	0.122218	R:-0.024<br>R-pval:0.819<br>
aml154	aml154	3.49387	0.157431	2.6133	0.0990726	R:-0.085<br>R-pval:0.293<br>
	ps_avgpres_gse26576geo37_u133p2	7.39965	0.0910928	3.57585	0.216294	R:0.198<br>R-pval:0.241<br>
	ps_avgpres_gse26673geo16_u133p2	5.68184	0.367048	2.84466	0.258341	R:0.354<br>R-pval:0.179<br>
	ps_avgpres_gse26713geo124_u133p2	3.08326	0.134516	3.01946	0.0873134	R:0.337<br>R-pval:1.27e-04<br>
	ps_avgpres_gse31312geo498_u133p2	5.16417	0.0885236	4.16659	0.0692695	R:-0.036<br>R-pval:0.428<br>
	ps_avgpres_gse34771geo34_u133p2	5.72998	0.206352	2.5946	0.232106	R:0.098<br>R-pval:0.580<br>
	ps_avgpres_gse36245geo46_u133p2	8.20393	0.18648	0.923028	0.126876	R:0.109<br>R-pval:0.472<br>
	ps_avgpres_gse36907geo46_u133p2	2.6545	0.20801	2.78505	0.198115	R:0.066<br>R-pval:0.661<br>
	ps_avgpres_gse37418geo76_u133p2	7.93049	0.162569	3.65545	0.18497	R:-0.047<br>R-pval:0.685<br>
aml140	aml140	3.70031	0.135412	1.94094	0.105184	R:0.062<br>R-pval:0.469<br>
	ps_avgpres_gse38885geo65_u133p2	5.66649	0.13678	2.06838	0.134097	R:0.140<br>R-pval:0.267<br>
	ps_avgpres_gse39671geo130_u133p2	2.70549	0.122859	2.80495	0.095383	R:0.122<br>R-pval:0.166<br>
	ps_avgpres_gse43378geo50_u133p2	9.10164	0.110774	2.99317	0.126946	R:0.151<br>R-pval:0.297<br>
	ps_avgpres_gse49243geo73_u133p2	10.0684	0.159998	1.88865	0.177496	R:0.152<br>R-pval:0.201<br>
	ps_avgpres_gse50774geo21_u133p2	7.95197	0.200032	1.53307	0.188733	R:0.200<br>R-pval:0.386<br>
	ps_avgpres_gse51521geo20_u133p2	6.79391	0.180804	1.98691	0.177759	R:0.312<br>R-pval:0.181<br>
	ps_avgpres_gse53733geo70_u133p2	8.00166	0.0802309	2.57824	0.146034	R:-0.014<br>R-pval:0.907<br>
	ps_avgpres_gse56314geo33_u133p2	0.345963	0.101186	2.19857	0.158458	R:-0.097<br>R-pval:0.590<br>
	ps_avgpres_gse56315geo122_u133p2	4.27856	0.21494	2.50029	0.09031	R:0.020<br>R-pval:0.829<br>
	ps_avgpres_gse58445geo193_u133p2	6.67419	0.0856352	2.82057	0.0973039	R:0.148<br>R-pval:0.039<br>
	ps_avgpres_gse61578geo26_u133p2	5.32655	0.320554	2.46835	0.285153	R:0.152<br>R-pval:0.458<br>
PP51	PP51	7.15525	0.159038	4.02134	0.161768	R:0.375<br>R-pval:6.77e-03<br>
	ps_avgpres_gse67851geo31_u133p2	7.93388	0.239242	3.19652	0.231783	R:0.059<br>R-pval:0.753<br>
all97	all97	3.68243	0.191441	3.77932	0.125476	R:0.362<br>R-pval:2.68e-04<br>
aml460	aml460	3.50779	0.074091	2.72975	0.0393598	R:0.107<br>R-pval:0.022<br>
	ps_avgpres_gse73038geo182_u133p2	8.47379	0.102064	1.81364	0.109115	R:0.005<br>R-pval:0.946<br>
	ps_avgpres_gse74195geo51_u133p2	8.02109	0.193464	3.7829	0.166566	R:0.094<br>R-pval:0.511<br>
	ps_avgpres_gse7696geo84_u133p2	8.64563	0.093174	2.9823	0.123994	R:0.087<br>R-pval:0.430<br>
	ps_avgpres_gse81183geo42_u133p2	5.68208	0.213496	3.04609	0.253275	R:0.208<br>R-pval:0.186<br>
	ps_avgpres_gse87371geo223_u133p2	6.05887	0.063926	1.72317	0.0505963	R:0.055<br>R-pval:0.415<br>
	ps_avgpres_gse93261geo149_u133p2	7.09412	0.0404841	1.494	0.0949355	R:-0.125<br>R-pval:0.128<br>
	ps_avgpres_gse93291geob122_u133p2	5.98496	0.08451	2.80421	0.115957	R:-0.030<br>R-pval:0.741<br>
MB223	MB223	8.65826	0.0945353	2.46272	0.109184	R:-0.033<br>R-pval:0.621<br>
MB57	MB57	7.98439	0.220654	3.31997	0.189865	R:-0.034<br>R-pval:0.800<br>
MB62	MB62	8.12276	0.200554	4.10534	0.214198	R:-0.027<br>R-pval:0.835<br>
myeloma542	myeloma542	4.12073	0.0691018	3.34748	0.04059	R:0.228<br>R-pval:8.42e-08<br>
NB88	NB88	7.1036	0.0947024	3.83207	0.122298	R:0.159<br>R-pval:0.139<br>
NB64	NB64	7.00721	0.178668	3.90224	0.168184	R:0.416<br>R-pval:6.36e-04<br>
NB51	NB51	7.27284	0.0960559	4.4595	0.156828	R:0.035<br>R-pval:0.805<br>
NB30	NB30	6.73831	0.180928	3.68823	0.191605	R:-0.045<br>R-pval:0.814<br>
