# Supplementary material for: Two Receptors, Two Isoforms, Two Cancers: Comprehensive Analysis of KIT and TrkA Expression in Neuroblastoma and Acute Myeloid Leukemia
Source: Front Oncol. 2019 Oct 18;9:1046. doi: 10.3389/fonc.2019.01046 (PMC6813278; doi:10.3389/fonc.2019.01046)
Supplement: Supplementary Table 2 — List of enriched Gene Ontology gene sets identified by GSEA in t(8;21)/inv16 AML, other AML karyotypes and NB with high KIT expression. SIZE- total number of genes in gene set; ES- enrichment score; NES- normalized enrichment score. [file Table_2.XLSX]

## Sheet: denBoer AML t(8;21)inv16
NAME	SIZE	ES	NES	NOM p-val	FDR q-val	FWER p-val	RANK AT MAX	LEADING EDGE
GO_PROTEIN_SUMOYLATION	109	0.617693	2.10717	0	0.0140112	0.08	2843	tags=47%, list=14%, signal=54%
GO_RNA_METHYLATION	46	0.633406	2.1088	0	0.015441	0.07	3806	tags=54%, list=19%, signal=67%
GO_CHROMOSOME_SEGREGATION	252	0.539802	2.01625	0	0.0179945	0.2	3708	tags=46%, list=18%, signal=56%
GO_MACROMOLECULE_METHYLATION	175	0.486377	2.01452	0	0.0186023	0.23	3613	tags=38%, list=18%, signal=46%
GO_ORGANELLE_FISSION	456	0.505923	2.02039	0	0.018681	0.2	4178	tags=46%, list=20%, signal=57%
GO_DNA_MODIFICATION	72	0.563257	2.01735	0	0.0186875	0.2	3347	tags=44%, list=16%, signal=53%
GO_DNA_REPAIR	423	0.525842	2.07749	0	0.0192826	0.11	3354	tags=43%, list=16%, signal=51%
GO_TRNA_METABOLIC_PROCESS	157	0.662095	2.00728	0	0.019293	0.25	4389	tags=64%, list=21%, signal=81%
GO_DNA_DEPENDENT_DNA_REPLICATION	90	0.643964	2.03253	0	0.0198182	0.19	2890	tags=54%, list=14%, signal=63%
GO_DNA_REPLICATION	192	0.585669	1.99376	0	0.0198631	0.3	4713	tags=60%, list=23%, signal=78%
GO_CELL_CYCLE_CHECKPOINT	182	0.552045	2.03633	0	0.0201753	0.17	3450	tags=48%, list=17%, signal=57%
GO_METHYLATION	241	0.478412	1.99556	0	0.0205006	0.3	3613	tags=37%, list=18%, signal=45%
GO_RNA_MODIFICATION	104	0.611295	2.10983	0	0.020588	0.07	3806	tags=51%, list=19%, signal=62%
GO_MITOTIC_NUCLEAR_DIVISION	336	0.547102	1.98557	0	0.0211959	0.32	4178	tags=52%, list=20%, signal=64%
GO_MISMATCH_REPAIR	27	0.743772	1.98351	0	0.0212468	0.33	2499	tags=59%, list=12%, signal=67%
GO_DNA_INTEGRITY_CHECKPOINT	138	0.552617	1.97983	0	0.0212633	0.33	3450	tags=47%, list=17%, signal=56%
GO_NEGATIVE_REGULATION_OF_NUCLEAR_DIVISION	45	0.594997	1.98627	0	0.0213333	0.32	3169	tags=42%, list=15%, signal=50%
GO_TRNA_PROCESSING	101	0.641958	1.98708	0	0.0216583	0.32	4240	tags=56%, list=21%, signal=71%
GO_DNA_RECOMBINATION	190	0.574236	2.11337	0	0.0220309	0.05	4713	tags=56%, list=23%, signal=72%
GO_NEGATIVE_REGULATION_OF_CELL_DIVISION	59	0.567341	1.96806	0	0.0221327	0.36	3169	tags=41%, list=15%, signal=48%
GO_SOMATIC_RECOMBINATION_OF_IMMUNOGLOBULIN_GENE_SEGMENTS	21	0.733721	2.03723	0	0.0221929	0.17	3836	tags=67%, list=19%, signal=82%
GO_SOMATIC_DIVERSIFICATION_OF_IMMUNE_RECEPTORS	40	0.615215	1.99657	0	0.0226585	0.3	3836	tags=48%, list=19%, signal=58%
GO_TRNA_MODIFICATION	51	0.665667	1.96875	0	0.0228959	0.36	4240	tags=57%, list=21%, signal=72%
GO_MITOTIC_SPINDLE_ORGANIZATION	63	0.65229	1.97216	0	0.02345	0.36	4287	tags=67%, list=21%, signal=84%
GO_RNA_PHOSPHODIESTER_BOND_HYDROLYSIS_EXONUCLEOLYTIC	32	0.692955	1.92182	0	0.0237526	0.52	3594	tags=59%, list=18%, signal=72%
GO_TRNA_TRANSPORT	30	0.711636	1.9221	0	0.0240501	0.52	2407	tags=53%, list=12%, signal=60%
GO_REGULATION_OF_CHROMOSOME_ORGANIZATION	262	0.482	1.92547	0	0.0240657	0.52	5004	tags=50%, list=24%, signal=65%
GO_NUCLEOTIDE_EXCISION_REPAIR_DNA_INCISION	38	0.641552	1.92816	0	0.0240967	0.51	2860	tags=61%, list=14%, signal=70%
GO_PEPTIDYL_LYSINE_MODIFICATION	277	0.489551	1.90451	0	0.0241242	0.58	4008	tags=42%, list=20%, signal=51%
GO_MRNA_3_END_PROCESSING	65	0.584856	1.93743	0	0.0244028	0.47	3764	tags=48%, list=18%, signal=58%
GO_NCRNA_TRANSCRIPTION	79	0.538658	1.90577	0	0.0244144	0.57	3794	tags=49%, list=19%, signal=60%
GO_POSITIVE_REGULATION_OF_CHROMOSOME_ORGANIZATION	140	0.498129	1.93244	0	0.0245105	0.49	4768	tags=53%, list=23%, signal=68%
GO_REGULATION_OF_TRANSCRIPTION_FROM_RNA_POLYMERASE_III_PROMOTER	20	0.697924	1.91626	0	0.0245408	0.53	4004	tags=65%, list=20%, signal=81%
GO_ISOTYPE_SWITCHING	16	0.737097	2.03803	0	0.0246588	0.17	3836	tags=69%, list=19%, signal=85%
GO_RNA_POLYADENYLATION	28	0.612469	1.94758	0	0.0247856	0.45	3764	tags=54%, list=18%, signal=66%
GO_IMMUNOGLOBULIN_PRODUCTION	42	0.547094	1.91466	0	0.0247988	0.54	3836	tags=48%, list=19%, signal=58%
GO_DNA_STRAND_ELONGATION	30	0.758452	1.93311	0	0.0248793	0.49	3245	tags=70%, list=16%, signal=83%

## Sheet: denBoer other AML
NAME	SIZE	ES	NES	NOM p-val	FDR q-val	FWER p-val	RANK AT MAX	LEADING EDGE
GO_TRANSCRIPTION_INITIATION_FROM_RNA_POLYMERASE_II_PROMOTER	148	0.462094	2.04216	0	0.0508788	0.2	3385	tags=34%, list=17%, signal=41%
GO_MACROMOLECULE_METHYLATION	175	0.503185	2.05242	0	0.0543408	0.19	2770	tags=34%, list=14%, signal=39%
GO_PROTEIN_AUTOUBIQUITINATION	49	0.543429	2.0777	0	0.0643608	0.1	3462	tags=41%, list=17%, signal=49%
GO_POSTTRANSCRIPTIONAL_GENE_SILENCING	36	0.646532	2.05319	0	0.0679261	0.19	2856	tags=53%, list=14%, signal=61%
GO_DNA_TEMPLATED_TRANSCRIPTION_INITIATION	188	0.467477	2.06284	0	0.0767793	0.18	3385	tags=35%, list=17%, signal=41%
GO_PYRIMIDINE_NUCLEOSIDE_TRIPHOSPHATE_BIOSYNTHETIC_PROCESS	15	0.679778	1.88903	0	0.0908291	0.68	1552	tags=33%, list=8%, signal=36%
GO_CHROMATIN_MODIFICATION	490	0.445079	1.89038	0	0.0922879	0.68	3915	tags=37%, list=19%, signal=44%
GO_POSITIVE_REGULATION_OF_HISTONE_METHYLATION	30	0.636981	1.88154	0	0.0928879	0.68	1679	tags=43%, list=8%, signal=47%
GO_TRANSCRIPTION_FROM_RNA_POLYMERASE_III_PROMOTER	38	0.551042	1.8904	0	0.0963004	0.68	3102	tags=39%, list=15%, signal=46%
GO_INTRACELLULAR_STEROID_HORMONE_RECEPTOR_SIGNALING_PATHWAY	64	0.477114	1.89385	0	0.0978386	0.67	3541	tags=38%, list=17%, signal=45%
GO_PEPTIDYL_LYSINE_METHYLATION	62	0.520128	1.86549	0	0.0986343	0.73	3030	tags=40%, list=15%, signal=47%
GO_PEPTIDYL_LYSINE_MODIFICATION	277	0.466254	1.86796	0	0.0992509	0.73	3770	tags=38%, list=18%, signal=46%
GO_NCRNA_CATABOLIC_PROCESS	21	0.616316	1.86153	0	0.100342	0.73	4574	tags=57%, list=22%, signal=74%
GO_RRNA_METHYLATION	17	0.719196	1.89734	0	0.100993	0.66	2690	tags=59%, list=13%, signal=68%
GO_REGULATION_OF_TOR_SIGNALING	65	0.483752	1.86843	0	0.102107	0.73	3247	tags=35%, list=16%, signal=42%
GO_COVALENT_CHROMATIN_MODIFICATION	314	0.437998	1.90322	0	0.104635	0.64	3915	tags=37%, list=19%, signal=45%
GO_PEROXISOME_ORGANIZATION	33	0.586696	1.9069	0	0.106016	0.64	1948	tags=39%, list=10%, signal=43%
GO_RNA_3_END_PROCESSING	87	0.554493	1.9093	0	0.10873	0.64	4574	tags=49%, list=22%, signal=63%
GO_REGULATION_OF_TRANSCRIPTION_FROM_RNA_POLYMERASE_III_PROMOTER	20	0.586693	1.85118	0	0.109886	0.78	5090	tags=60%, list=25%, signal=80%
GO_PEROXISOMAL_TRANSPORT	18	0.643683	1.92036	0	0.111194	0.59	1948	tags=39%, list=10%, signal=43%
GO_PROTEIN_ALKYLATION	100	0.488767	1.90962	0	0.113111	0.62	2770	tags=32%, list=14%, signal=37%
GO_PYRIMIDINE_RIBONUCLEOTIDE_METABOLIC_PROCESS	20	0.604363	1.92373	0	0.114686	0.59	2386	tags=35%, list=12%, signal=40%
GO_METHYLATION	241	0.471936	1.95461	0	0.115237	0.46	2828	tags=33%, list=14%, signal=38%
GO_HISTONE_METHYLATION	75	0.500677	1.91278	0	0.116059	0.61	3030	tags=36%, list=15%, signal=42%
GO_REGULATION_OF_INTRACELLULAR_STEROID_HORMONE_RECEPTOR_SIGNALING_PATHWAY	55	0.478193	1.82123	0	0.118555	0.89	4120	tags=45%, list=20%, signal=57%
GO_RNA_SPLICING_VIA_ENDONUCLEOLYTIC_CLEAVAGE_AND_LIGATION	15	0.609915	1.82319	0	0.118642	0.87	2846	tags=53%, list=14%, signal=62%
GO_DNA_DEALKYLATION	19	0.653555	1.83083	0	0.118766	0.87	1763	tags=42%, list=9%, signal=46%
GO_MAINTENANCE_OF_CELL_NUMBER	128	0.407424	1.82521	0	0.119877	0.87	3376	tags=30%, list=17%, signal=35%
GO_PYRIMIDINE_NUCLEOSIDE_TRIPHOSPHATE_METABOLIC_PROCESS	17	0.681261	1.9263	0	0.120348	0.58	1552	tags=35%, list=8%, signal=38%
GO_RNA_LOCALIZATION	162	0.483584	1.81261	0	0.120431	0.89	4548	tags=44%, list=22%, signal=57%
GO_PROTEIN_UBIQUITINATION_INVOLVED_IN_UBIQUITIN_DEPENDENT_PROTEIN_CATABOLIC_PROCESS	129	0.500386	1.94408	0	0.12052	0.54	4519	tags=47%, list=22%, signal=59%
GO_GENE_SILENCING_BY_RNA	111	0.483998	1.83171	0	0.120896	0.86	3376	tags=36%, list=17%, signal=43%
GO_REGULATION_OF_MRNA_CATABOLIC_PROCESS	24	0.578727	1.81467	0	0.121296	0.89	1504	tags=33%, list=7%, signal=36%
GO_RNA_METHYLATION	46	0.591627	1.82677	0	0.121711	0.87	3049	tags=48%, list=15%, signal=56%
GO_NEGATIVE_REGULATION_OF_TOR_SIGNALING	30	0.632422	2.10207	0	0.123363	0.1	2217	tags=43%, list=11%, signal=49%
GO_DNA_METHYLATION_OR_DEMETHYLATION	54	0.547926	1.97169	0	0.123947	0.4	2131	tags=31%, list=10%, signal=35%
GO_NLS_BEARING_PROTEIN_IMPORT_INTO_NUCLEUS	21	0.661218	1.95484	0	0.129641	0.46	4439	tags=67%, list=22%, signal=85%
GO_ANDROGEN_RECEPTOR_SIGNALING_PATHWAY	39	0.552514	1.92801	0	0.130429	0.58	3541	tags=41%, list=17%, signal=50%
GO_RRNA_CATABOLIC_PROCESS	16	0.672515	1.79802	0	0.132582	0.92	4574	tags=63%, list=22%, signal=80%
GO_REGULATION_OF_HISTONE_H3_K4_METHYLATION	24	0.60883	1.79852	0	0.135169	0.92	2509	tags=42%, list=12%, signal=47%
GO_MULTI_ORGANISM_LOCALIZATION	61	0.512622	1.77607	0	0.144207	0.92	3051	tags=38%, list=15%, signal=44%
GO_HISTONE_H3_K4_METHYLATION	27	0.57496	1.77859	0	0.145596	0.92	4252	tags=48%, list=21%, signal=61%
GO_REGULATION_OF_GENE_SILENCING	46	0.514873	1.76913	0	0.147712	0.93	3494	tags=39%, list=17%, signal=47%
GO_PROTEIN_LOCALIZATION_TO_GOLGI_APPARATUS	26	0.530739	1.77868	0	0.148558	0.92	3011	tags=42%, list=15%, signal=50%
GO_REGULATION_OF_ESTABLISHMENT_OR_MAINTENANCE_OF_CELL_POLARITY	20	0.638255	1.76065	0	0.150135	0.95	2489	tags=40%, list=12%, signal=45%
GO_DNA_ALKYLATION	41	0.49446	1.76415	0	0.152751	0.95	2131	tags=27%, list=10%, signal=30%
GO_PROTEIN_MONOUBIQUITINATION	50	0.497013	1.71972	0	0.157866	1	4810	tags=54%, list=24%, signal=70%
GO_RNA_MODIFICATION	104	0.493823	1.69421	0	0.158998	1	5418	tags=55%, list=26%, signal=74%
GO_REGULATION_OF_TRANSCRIPTION_ELONGATION_FROM_RNA_POLYMERASE_II_PROMOTER	21	0.550927	1.70797	0	0.159023	1	2233	tags=38%, list=11%, signal=43%
GO_PROTEIN_IMPORT	144	0.373927	1.69235	0	0.159373	1	2870	tags=26%, list=14%, signal=30%
GO_NUCLEAR_IMPORT	121	0.404951	1.71996	0	0.15968	1	2870	tags=29%, list=14%, signal=33%
GO_PROTEIN_ACYLATION	139	0.396197	1.69468	0	0.160285	1	3770	tags=35%, list=18%, signal=42%
GO_FEAR_RESPONSE	29	0.533409	1.72072	0	0.160547	1	1743	tags=24%, list=9%, signal=26%
GO_DNA_MODIFICATION	72	0.482741	1.70341	0	0.161266	1	2492	tags=28%, list=12%, signal=32%
GO_NEGATIVE_REGULATION_OF_CHROMATIN_MODIFICATION	44	0.49348	1.70069	0	0.161394	1	3859	tags=41%, list=19%, signal=50%
GO_PROTEIN_ACETYLATION	110	0.435384	1.6952	0	0.16149	1	3770	tags=37%, list=18%, signal=45%
GO_POSITIVE_REGULATION_OF_CELL_CYCLE_G1_S_PHASE_TRANSITION	28	0.501928	1.70438	0	0.162016	1	4832	tags=57%, list=24%, signal=75%
GO_PEPTIDYL_LYSINE_TRIMETHYLATION	18	0.631157	1.73746	0	0.162087	0.98	2495	tags=39%, list=12%, signal=44%
GO_TRNA_PROCESSING	101	0.506688	1.72213	0	0.162365	0.99	5418	tags=54%, list=26%, signal=74%
GO_REGULATION_OF_MRNA_METABOLIC_PROCESS	105	0.477178	1.74911	0	0.162709	0.96	4778	tags=45%, list=23%, signal=58%
GO_PROTEIN_POLYUBIQUITINATION	234	0.404867	1.69537	0	0.162881	1	3651	tags=35%, list=18%, signal=42%
GO_TRNA_METABOLIC_PROCESS	157	0.52808	1.71052	0	0.163259	1	5439	tags=58%, list=27%, signal=78%
GO_REGULATION_OF_INTRACELLULAR_ESTROGEN_RECEPTOR_SIGNALING_PATHWAY	25	0.584433	1.73857	0	0.163419	0.97	3977	tags=56%, list=19%, signal=69%
GO_RETROGRADE_TRANSPORT_VESICLE_RECYCLING_WITHIN_GOLGI	17	0.618152	1.71191	0	0.163456	1	2500	tags=47%, list=12%, signal=54%
GO_ESTABLISHMENT_OF_PROTEIN_LOCALIZATION_TO_VACUOLE	29	0.562846	1.74042	0	0.16369	0.97	2222	tags=41%, list=11%, signal=46%
GO_PERICARDIUM_DEVELOPMENT	17	0.578629	1.67763	0	0.163791	1	3629	tags=35%, list=18%, signal=43%
GO_DEMETHYLATION	50	0.478489	1.72436	0	0.164186	0.99	3030	tags=34%, list=15%, signal=40%
GO_MICROTUBULE_POLYMERIZATION	27	0.528149	1.69578	0	0.164267	1	4639	tags=52%, list=23%, signal=67%
GO_DNA_TEMPLATED_TRANSCRIPTION_TERMINATION	90	0.519654	1.68439	0	0.165065	1	5166	tags=52%, list=25%, signal=70%
GO_POSITIVE_REGULATION_OF_CHROMOSOME_ORGANIZATION	140	0.445054	1.71238	0	0.165104	1	3253	tags=32%, list=16%, signal=38%
GO_NEGATIVE_REGULATION_OF_CHROMOSOME_ORGANIZATION	94	0.469734	1.68517	0	0.165792	1	4292	tags=39%, list=21%, signal=50%
GO_NCRNA_METABOLIC_PROCESS	458	0.452135	1.67859	0	0.166134	1	4574	tags=39%, list=22%, signal=49%
GO_POSITIVE_REGULATION_OF_TRANSCRIPTION_FROM_RNA_POLYMERASE_II_PROMOTER_INVOLVED_IN_CELLULAR_RESPONSE_TO_CHEMICAL_STIMULUS	26	0.540111	1.67205	0	0.170562	1	3525	tags=46%, list=17%, signal=56%
GO_REGULATION_OF_DNA_TEMPLATED_TRANSCRIPTION_ELONGATION	38	0.457762	1.66976	0	0.17169	1	4996	tags=50%, list=24%, signal=66%
GO_TRANSCRIPTION_FROM_RNA_POLYMERASE_I_PROMOTER	34	0.528145	1.65367	0	0.174501	1	5066	tags=56%, list=25%, signal=74%
GO_RNA_PHOSPHODIESTER_BOND_HYDROLYSIS_EXONUCLEOLYTIC	32	0.597219	1.6589	0	0.176458	1	5604	tags=69%, list=27%, signal=95%
GO_RIBONUCLEOPROTEIN_COMPLEX_BIOGENESIS	378	0.474405	1.66334	0	0.176552	1	4623	tags=40%, list=23%, signal=51%
GO_ZINC_II_ION_TRANSPORT	26	0.560222	1.65757	0	0.176603	1	3782	tags=50%, list=18%, signal=61%
GO_REGULATION_OF_SIGNAL_TRANSDUCTION_BY_P53_CLASS_MEDIATOR	157	0.410956	1.65997	0	0.176627	1	3960	tags=34%, list=19%, signal=42%
GO_REGULATION_OF_GENE_EXPRESSION_EPIGENETIC	186	0.392767	1.64738	0	0.177974	1	3630	tags=32%, list=18%, signal=39%
GO_INTRA_GOLGI_VESICLE_MEDIATED_TRANSPORT	38	0.505938	1.64289	0	0.179968	1	5478	tags=53%, list=27%, signal=72%
GO_CLEAVAGE_INVOLVED_IN_RRNA_PROCESSING	17	0.621471	1.63182	0	0.19047	1	5955	tags=59%, list=29%, signal=83%
GO_TRNA_MODIFICATION	51	0.537135	1.61634	0	0.20301	1	4076	tags=49%, list=20%, signal=61%
GO_POSITIVE_REGULATION_OF_CHROMATIN_MODIFICATION	82	0.438597	1.59088	0	0.223911	1	3247	tags=32%, list=16%, signal=38%
GO_ORGANELLE_ASSEMBLY	447	0.33949	1.59098	0	0.225364	1	3420	tags=27%, list=17%, signal=31%
GO_NONMOTILE_PRIMARY_CILIUM_ASSEMBLY	22	0.564788	1.61395	0.015625	0.204931	1	4218	tags=50%, list=21%, signal=63%
GO_GOLGI_ORGANIZATION	79	0.42409	1.64318	0.0163934	0.181089	1	4385	tags=43%, list=21%, signal=55%
GO_POST_GOLGI_VESICLE_MEDIATED_TRANSPORT	80	0.43456	1.63207	0.0163934	0.191737	1	3716	tags=40%, list=18%, signal=49%
GO_STEROID_HORMONE_MEDIATED_SIGNALING_PATHWAY	117	0.362432	1.60064	0.0166667	0.212953	1	3541	tags=29%, list=17%, signal=35%
GO_SOMATIC_STEM_CELL_DIVISION	21	0.540139	1.66259	0.0169492	0.176437	1	3400	tags=29%, list=17%, signal=34%
GO_REGULATION_OF_POSTTRANSCRIPTIONAL_GENE_SILENCING	18	0.572551	1.65522	0.0169492	0.176596	1	3494	tags=44%, list=17%, signal=54%
GO_RRNA_MODIFICATION	23	0.651924	1.8449	0.0175439	0.109062	0.78	2690	tags=52%, list=13%, signal=60%
GO_NUCLEOBASE_CONTAINING_COMPOUND_TRANSPORT	176	0.441462	1.7443	0.0175439	0.161194	0.97	4301	tags=40%, list=21%, signal=50%
GO_GOLGI_VESICLE_TRANSPORT	295	0.401285	1.67829	0.0175439	0.164906	1	4448	tags=41%, list=22%, signal=52%
GO_ER_TO_GOLGI_VESICLE_MEDIATED_TRANSPORT	157	0.390119	1.59276	0.0175439	0.223577	1	4539	tags=39%, list=22%, signal=50%
GO_PROTEIN_SUMOYLATION	109	0.481562	1.77237	0.0178571	0.144487	0.93	4756	tags=44%, list=23%, signal=57%
GO_HISTONE_H4_ACETYLATION	41	0.492261	1.62715	0.0178571	0.192255	1	5372	tags=56%, list=26%, signal=76%
GO_MRNA_PROCESSING	384	0.481386	1.89969	0.0181818	0.102872	0.65	4496	tags=43%, list=22%, signal=54%
GO_GENE_SILENCING	165	0.423803	1.72106	0.0181818	0.162409	1	3376	tags=33%, list=17%, signal=39%
GO_RIBONUCLEOPROTEIN_COMPLEX_SUBUNIT_ORGANIZATION	172	0.486462	1.75033	0.0181818	0.163474	0.96	4455	tags=42%, list=22%, signal=54%
GO_NEGATIVE_REGULATION_OF_CELLULAR_AMIDE_METABOLIC_PROCESS	116	0.426531	1.72611	0.0181818	0.164372	0.99	5555	tags=53%, list=27%, signal=72%
GO_PYRIMIDINE_NUCLEOTIDE_METABOLIC_PROCESS	40	0.465142	1.65517	0.0185185	0.175125	1	4790	tags=43%, list=23%, signal=55%
GO_NUCLEAR_TRANSPORT	322	0.373548	1.6612	0.0185185	0.176693	1	4489	tags=37%, list=22%, signal=47%
GO_RNA_SPLICING	328	0.483708	1.84734	0.0188679	0.109171	0.78	4301	tags=43%, list=21%, signal=54%
GO_TRNA_TRANSPORT	30	0.618958	1.77562	0.0188679	0.142122	0.93	3690	tags=47%, list=18%, signal=57%
GO_SNRNA_METABOLIC_PROCESS	73	0.487593	1.73	0.0188679	0.165782	0.99	4574	tags=48%, list=22%, signal=62%
GO_MRNA_CIS_SPLICING_VIA_SPLICEOSOME	16	0.577375	1.63052	0.0188679	0.190497	1	6017	tags=63%, list=29%, signal=88%
GO_POSITIVE_REGULATION_OF_CELL_CYCLE_PHASE_TRANSITION	67	0.436333	1.62061	0.0188679	0.199285	1	4832	tags=48%, list=24%, signal=62%
GO_S_ADENOSYLMETHIONINE_METABOLIC_PROCESS	18	0.549259	1.57878	0.0188679	0.235169	1	4488	tags=56%, list=22%, signal=71%
GO_RIBONUCLEOPROTEIN_COMPLEX_LOCALIZATION	105	0.514173	1.78329	0.0192308	0.14923	0.92	4489	tags=43%, list=22%, signal=55%
GO_REGULATION_OF_HISTONE_METHYLATION	52	0.516289	1.76121	0.0192308	0.152176	0.95	3247	tags=42%, list=16%, signal=50%
GO_MRNA_3_END_PROCESSING	65	0.534067	1.74787	0.0192308	0.159117	0.96	4425	tags=48%, list=22%, signal=61%
GO_DNA_TEMPLATED_TRANSCRIPTION_ELONGATION	88	0.454099	1.70837	0.0192308	0.160425	1	4632	tags=45%, list=23%, signal=59%
GO_MICROTUBULE_POLYMERIZATION_OR_DEPOLYMERIZATION	40	0.490914	1.70153	0.0192308	0.161902	1	4639	tags=48%, list=23%, signal=61%
GO_REGULATION_OF_ALTERNATIVE_MRNA_SPLICING_VIA_SPLICEOSOME	31	0.542801	1.72777	0.0192308	0.16707	0.99	5242	tags=58%, list=26%, signal=78%
GO_LEFT_RIGHT_PATTERN_FORMATION	21	0.546403	1.62429	0.0192308	0.19497	1	3578	tags=38%, list=17%, signal=46%
GO_POSITIVE_REGULATION_OF_TELOMERE_CAPPING	15	0.635113	1.7337	0.0196078	0.162953	0.98	2655	tags=47%, list=13%, signal=54%
GO_REGULATION_OF_CHROMOSOME_ORGANIZATION	262	0.418201	1.66499	0.0196078	0.176291	1	4381	tags=37%, list=21%, signal=47%
GO_RESPONSE_TO_UV	118	0.394562	1.64488	0.0196078	0.180335	1	3247	tags=27%, list=16%, signal=32%
GO_REGULATION_OF_CELLULAR_AMIDE_METABOLIC_PROCESS	304	0.372056	1.6022	0.0196078	0.215553	1	5333	tags=42%, list=26%, signal=57%
GO_NUCLEAR_EXPORT	131	0.494369	1.7873	0.02	0.145959	0.92	4489	tags=45%, list=22%, signal=57%
GO_REGULATION_OF_CHROMATIN_SILENCING	20	0.63805	1.7487	0.02	0.16052	0.96	4500	tags=60%, list=22%, signal=77%
GO_NCRNA_TRANSCRIPTION	79	0.478828	1.71006	0.02	0.161602	1	4100	tags=43%, list=20%, signal=54%
GO_SPLICEOSOMAL_COMPLEX_ASSEMBLY	48	0.538771	1.68832	0.02	0.163506	1	4425	tags=50%, list=22%, signal=64%
GO_PYRIMIDINE_NUCLEOTIDE_BIOSYNTHETIC_PROCESS	26	0.50773	1.68058	0.02	0.166673	1	2386	tags=27%, list=12%, signal=30%
GO_TERMINATION_OF_RNA_POLYMERASE_II_TRANSCRIPTION	56	0.53757	1.65407	0.02	0.175358	1	4425	tags=46%, list=22%, signal=59%
GO_RNA_SECONDARY_STRUCTURE_UNWINDING	36	0.535377	1.77945	0.0204082	0.150486	0.92	2445	tags=36%, list=12%, signal=41%
GO_POSITIVE_REGULATION_OF_ERYTHROCYTE_DIFFERENTIATION	23	0.509855	1.57065	0.0212766	0.240291	1	5308	tags=52%, list=26%, signal=70%
GO_N_TERMINAL_PROTEIN_AMINO_ACID_MODIFICATION	22	0.574328	1.76375	0.0217391	0.150304	0.95	2651	tags=45%, list=13%, signal=52%
GO_PROTEIN_K63_LINKED_UBIQUITINATION	35	0.449468	1.62839	0.0222222	0.192127	1	3149	tags=31%, list=15%, signal=37%
GO_EMBRYONIC_HEART_TUBE_DEVELOPMENT	69	0.396163	1.60306	0.0285714	0.215582	1	3406	tags=29%, list=17%, signal=35%
GO_STEM_CELL_DIVISION	28	0.5028	1.69763	0.0298507	0.163499	1	4373	tags=36%, list=21%, signal=45%
GO_MICROTUBULE_ORGANIZING_CENTER_ORGANIZATION	80	0.497444	1.70946	0.0327869	0.160757	1	4279	tags=48%, list=21%, signal=60%
GO_PROTEIN_LOCALIZATION_TO_LYSOSOME	16	0.594755	1.67889	0.0344828	0.167514	1	2191	tags=38%, list=11%, signal=42%
GO_RNA_PHOSPHODIESTER_BOND_HYDROLYSIS	98	0.437799	1.61729	0.0344828	0.203326	1	3274	tags=35%, list=16%, signal=41%
GO_GOLGI_TO_PLASMA_MEMBRANE_TRANSPORT	40	0.491205	1.65594	0.0357143	0.177261	1	4406	tags=48%, list=22%, signal=60%
GO_NCRNA_3_END_PROCESSING	17	0.678004	1.72657	0.0363636	0.166373	0.99	4574	tags=59%, list=22%, signal=76%
GO_MICROTUBULE_NUCLEATION	18	0.605101	1.65304	0.0363636	0.174008	1	4639	tags=56%, list=23%, signal=72%
GO_BASE_EXCISION_REPAIR	38	0.504261	1.60198	0.0363636	0.214218	1	5545	tags=55%, list=27%, signal=76%
GO_MACROMOLECULE_DEACYLATION	64	0.42701	1.5714	0.0363636	0.240653	1	4252	tags=39%, list=21%, signal=49%
GO_MATURATION_OF_SSU_RRNA	38	0.563475	1.68186	0.037037	0.166487	1	4471	tags=42%, list=22%, signal=54%
GO_RNA_SPLICING_VIA_TRANSESTERIFICATION_REACTIONS	244	0.485253	1.77835	0.0377359	0.143197	0.92	5260	tags=49%, list=26%, signal=65%
GO_CENTRIOLE_ASSEMBLY	19	0.633296	1.64808	0.0384615	0.178477	1	2663	tags=47%, list=13%, signal=54%
GO_2_OXOGLUTARATE_METABOLIC_PROCESS	20	0.54094	1.58654	0.0392157	0.22728	1	5378	tags=65%, list=26%, signal=88%
GO_RNA_CAPPING	33	0.511358	1.60466	0.0408163	0.215408	1	3376	tags=39%, list=17%, signal=47%
GO_PROTEIN_MODIFICATION_BY_SMALL_PROTEIN_REMOVAL	106	0.384147	1.58433	0.0408163	0.228744	1	5108	tags=41%, list=25%, signal=54%
GO_POSITIVE_REGULATION_OF_TELOMERE_MAINTENANCE_VIA_TELOMERE_LENGTHENING	31	0.555125	1.56495	0.0416667	0.246722	1	3253	tags=42%, list=16%, signal=50%
GO_MRNA_CLEAVAGE	16	0.566848	1.72368	0.0444444	0.162682	0.99	3014	tags=44%, list=15%, signal=51%

## Sheet: Versteeg NB
NAME	SIZE	ES	NES	NOM p-val	FDR q-val	FWER p-val	RANK AT MAX	LEADING EDGE
GO_MITOTIC_DNA_INTEGRITY_CHECKPOINT	95	0.518317	1.74445	0	0.180419	0.9	3297	tags=37%, list=16%, signal=44%
GO_RECOMBINATIONAL_REPAIR	69	0.610339	1.74566	0	0.182143	0.9	4142	tags=55%, list=20%, signal=69%
GO_DNA_INTEGRITY_CHECKPOINT	138	0.500241	1.7474	0	0.182761	0.89	4582	tags=43%, list=22%, signal=56%
GO_TELOMERE_MAINTENANCE_VIA_TELOMERE_LENGTHENING	25	0.640198	1.76094	0	0.182918	0.87	4053	tags=56%, list=20%, signal=70%
GO_REGULATION_OF_TELOMERE_MAINTENANCE_VIA_TELOMERE_LENGTHENING	47	0.56594	1.74586	0	0.18333	0.9	4107	tags=49%, list=20%, signal=61%
GO_REGULATION_OF_CENTROSOME_DUPLICATION	29	0.56189	1.76158	0	0.184047	0.87	5250	tags=52%, list=26%, signal=69%
GO_TRNA_METHYLATION	19	0.646508	1.75884	0	0.184641	0.88	3137	tags=58%, list=15%, signal=68%
GO_DNA_METHYLATION_OR_DEMETHYLATION	54	0.557525	1.7506	0	0.184641	0.88	4453	tags=43%, list=22%, signal=54%
GO_DNA_PACKAGING	155	0.536397	1.73993	0	0.184703	0.9	4097	tags=45%, list=20%, signal=55%
GO_SERINE_FAMILY_AMINO_ACID_BIOSYNTHETIC_PROCESS	15	0.624395	1.75724	0	0.18482	0.88	2296	tags=40%, list=11%, signal=45%
GO_TELOMERE_CAPPING	21	0.603752	1.76381	0	0.185312	0.87	4582	tags=48%, list=22%, signal=61%
GO_NEURAL_TUBE_PATTERNING	31	0.556447	1.76159	0	0.185633	0.87	1548	tags=29%, list=8%, signal=31%
GO_DNA_DOUBLE_STRAND_BREAK_PROCESSING	18	0.682883	1.75362	0	0.186317	0.88	5448	tags=72%, list=27%, signal=98%
GO_CHROMATIN_ASSEMBLY_OR_DISASSEMBLY	140	0.528853	1.75133	0	0.186582	0.88	4097	tags=44%, list=20%, signal=54%
GO_RESPONSE_TO_UV	118	0.435115	1.69904	0	0.186605	0.92	4273	tags=38%, list=21%, signal=48%
GO_RNA_POLYADENYLATION	28	0.608811	1.69833	0	0.186664	0.92	4961	tags=61%, list=24%, signal=80%
GO_RIBONUCLEOPROTEIN_COMPLEX_BIOGENESIS	378	0.620447	1.76737	0	0.187041	0.86	5348	tags=67%, list=26%, signal=90%
GO_DOUBLE_STRAND_BREAK_REPAIR	144	0.552573	1.76594	0	0.187189	0.87	4603	tags=52%, list=23%, signal=67%
GO_FOLIC_ACID_METABOLIC_PROCESS	16	0.597512	1.70022	0	0.187478	0.92	1034	tags=31%, list=5%, signal=33%
GO_CENTRIOLE_ASSEMBLY	19	0.658577	1.69944	0	0.187499	0.92	1768	tags=37%, list=9%, signal=40%
GO_COVALENT_CHROMATIN_MODIFICATION	314	0.425842	1.70168	0	0.187519	0.92	4978	tags=40%, list=24%, signal=52%
GO_PEPTIDYL_LYSINE_MODIFICATION	277	0.451003	1.70101	0	0.187617	0.92	4073	tags=37%, list=20%, signal=45%
GO_CELL_CYCLE_CHECKPOINT	182	0.511393	1.76822	0	0.187777	0.86	4582	tags=46%, list=22%, signal=59%
GO_RHYTHMIC_BEHAVIOR	17	0.588206	1.69471	0	0.187778	0.92	1268	tags=29%, list=6%, signal=31%
GO_NEGATIVE_REGULATION_OF_MITOTIC_CELL_CYCLE	187	0.473578	1.75148	0	0.187813	0.88	4659	tags=41%, list=23%, signal=53%
GO_EMBRYONIC_FORELIMB_MORPHOGENESIS	31	0.534124	1.67044	0	0.187829	0.92	2970	tags=32%, list=15%, signal=38%
GO_DNA_MODIFICATION	72	0.54023	1.73429	0	0.188002	0.9	4453	tags=42%, list=22%, signal=53%
GO_NOSE_DEVELOPMENT	15	0.643033	1.6936	0	0.18813	0.92	1078	tags=27%, list=5%, signal=28%
GO_RRNA_TRANSCRIPTION	16	0.695574	1.73478	0	0.188368	0.9	2078	tags=44%, list=10%, signal=49%
GO_REGULATION_OF_CENTROSOME_CYCLE	36	0.573904	1.73594	0	0.188525	0.9	5390	tags=56%, list=26%, signal=75%
GO_CENTROMERE_COMPLEX_ASSEMBLY	37	0.739098	1.70249	0	0.188565	0.92	3697	tags=65%, list=18%, signal=79%
GO_CHROMATIN_REMODELING	137	0.513373	1.70178	0	0.188574	0.92	4123	tags=45%, list=20%, signal=55%
GO_POSTTRANSCRIPTIONAL_GENE_SILENCING	36	0.584219	1.72874	0	0.188643	0.91	3714	tags=44%, list=18%, signal=54%
GO_POSITIVE_REGULATION_OF_DNA_REPAIR	33	0.583491	1.67123	0	0.188794	0.92	4147	tags=52%, list=20%, signal=65%
GO_REGULATION_OF_CELL_CYCLE_G2_M_PHASE_TRANSITION	58	0.522889	1.71391	0	0.188818	0.91	4164	tags=38%, list=20%, signal=47%
GO_DNA_BIOSYNTHETIC_PROCESS	110	0.557535	1.71296	0	0.189036	0.91	4980	tags=55%, list=24%, signal=73%
GO_DSRNA_FRAGMENTATION	17	0.626458	1.66736	0	0.189315	0.92	5735	tags=59%, list=28%, signal=82%
GO_POSITIVE_REGULATION_OF_DNA_REPLICATION	84	0.449375	1.70881	0	0.189446	0.92	4374	tags=36%, list=21%, signal=45%
GO_ATP_DEPENDENT_CHROMATIN_REMODELING	63	0.618041	1.70262	0	0.189595	0.92	3697	tags=54%, list=18%, signal=66%
GO_NUCLEAR_TRANSCRIBED_MRNA_CATABOLIC_PROCESS_EXONUCLEOLYTIC	30	0.710332	1.71076	0	0.189924	0.92	1978	tags=53%, list=10%, signal=59%
GO_RNA_METHYLATION	46	0.586128	1.72997	0	0.190011	0.91	3137	tags=46%, list=15%, signal=54%
GO_CELL_CYCLE_G1_S_PHASE_TRANSITION	107	0.568634	1.72157	0	0.190071	0.91	4164	tags=53%, list=20%, signal=67%
GO_POST_ANAL_TAIL_MORPHOGENESIS	17	0.606743	1.772	0	0.190171	0.84	4359	tags=47%, list=21%, signal=60%
GO_NEGATIVE_REGULATION_OF_CELL_CYCLE_G2_M_PHASE_TRANSITION	24	0.596806	1.67892	0	0.190203	0.92	4582	tags=46%, list=22%, signal=59%
GO_TERMINATION_OF_RNA_POLYMERASE_II_TRANSCRIPTION	56	0.613678	1.72659	0	0.190282	0.91	4961	tags=63%, list=24%, signal=82%
GO_POSITIVE_REGULATION_OF_CELL_CYCLE_PROCESS	231	0.42757	1.67671	0	0.190398	0.92	4164	tags=35%, list=20%, signal=44%
GO_REGULATION_OF_DNA_BINDING	88	0.457124	1.77411	0	0.190506	0.84	4107	tags=34%, list=20%, signal=42%
GO_DNA_REPLICATION_INDEPENDENT_NUCLEOSOME_ORGANIZATION	40	0.704361	1.71472	0	0.190534	0.91	3705	tags=58%, list=18%, signal=70%
GO_HISTONE_METHYLATION	75	0.498446	1.82398	0	0.190796	0.77	3742	tags=39%, list=18%, signal=47%
GO_INTRACELLULAR_ESTROGEN_RECEPTOR_SIGNALING_PATHWAY	16	0.597838	1.67207	0	0.190878	0.92	3584	tags=50%, list=18%, signal=61%
GO_MACROMOLECULE_DEACYLATION	64	0.487218	1.73016	0	0.191229	0.91	3786	tags=39%, list=19%, signal=48%
GO_REGULATION_OF_DNA_REPAIR	67	0.550357	1.72265	0	0.191297	0.91	3094	tags=42%, list=15%, signal=49%
GO_REGULATION_OF_CELLULAR_AMIDE_METABOLIC_PROCESS	304	0.425165	1.70399	0	0.191468	0.92	4226	tags=38%, list=21%, signal=47%
GO_NEGATIVE_REGULATION_OF_CELL_CYCLE_PHASE_TRANSITION	139	0.491226	1.67236	0	0.191516	0.92	4582	tags=42%, list=22%, signal=54%
GO_DNA_TEMPLATED_TRANSCRIPTION_INITIATION	188	0.417077	1.66382	0	0.191623	0.92	4543	tags=38%, list=22%, signal=48%
GO_NEGATIVE_REGULATION_OF_DNA_BINDING	46	0.472882	1.77218	0	0.191679	0.84	3270	tags=28%, list=16%, signal=34%
GO_NEGATIVE_REGULATION_OF_CELL_CYCLE_PROCESS	202	0.458267	1.67931	0	0.191762	0.92	4659	tags=41%, list=23%, signal=53%
GO_PARAXIAL_MESODERM_DEVELOPMENT	15	0.657781	1.68233	0	0.192104	0.92	902	tags=27%, list=4%, signal=28%
GO_ENTEROENDOCRINE_CELL_DIFFERENTIATION	19	0.642283	1.68899	0	0.192121	0.92	3140	tags=37%, list=15%, signal=43%
GO_REGULATION_OF_TELOMERE_MAINTENANCE	61	0.535093	1.67256	0	0.192155	0.92	4222	tags=48%, list=21%, signal=60%
GO_RIBONUCLEOPROTEIN_COMPLEX_SUBUNIT_ORGANIZATION	172	0.59309	1.79901	0	0.192303	0.81	5322	tags=63%, list=26%, signal=84%
GO_REGULATION_OF_SISTER_CHROMATID_SEGREGATION	63	0.591653	1.70421	0	0.192363	0.92	4878	tags=60%, list=24%, signal=79%
GO_SPINDLE_CHECKPOINT	24	0.667571	1.68118	0	0.192554	0.92	4462	tags=71%, list=22%, signal=90%
GO_REGULATION_OF_CHROMATIN_SILENCING	20	0.70013	1.80098	0	0.192783	0.81	4022	tags=75%, list=20%, signal=93%
GO_MATURATION_OF_5_8S_RRNA_FROM_TRICISTRONIC_RRNA_TRANSCRIPT_SSU_RRNA_5_8S_RRNA_LSU_RRNA_	17	0.718813	1.68008	0	0.192938	0.92	1958	tags=53%, list=10%, signal=58%
GO_HISTONE_EXCHANGE	42	0.67418	1.70473	0	0.192966	0.92	3697	tags=60%, list=18%, signal=73%
GO_SNRNA_METABOLIC_PROCESS	73	0.610608	1.80626	0	0.193486	0.81	3555	tags=48%, list=17%, signal=58%
GO_PEPTIDYL_LYSINE_METHYLATION	62	0.465434	1.66087	0	0.193715	0.92	3655	tags=35%, list=18%, signal=43%
GO_TELOMERE_MAINTENANCE_VIA_TELOMERASE	16	0.701026	1.82413	0	0.193778	0.77	2947	tags=56%, list=14%, signal=66%
GO_NUCLEOTIDE_EXCISION_REPAIR_DNA_DUPLEX_UNWINDING	21	0.601463	1.66126	0	0.194023	0.92	5896	tags=71%, list=29%, signal=100%
GO_NON_RECOMBINATIONAL_REPAIR	57	0.580644	1.77442	0	0.194111	0.84	4582	tags=54%, list=22%, signal=70%
GO_GENE_SILENCING	165	0.519067	1.81869	0	0.194212	0.79	3714	tags=39%, list=18%, signal=48%
GO_PROTEIN_DNA_COMPLEX_SUBUNIT_ORGANIZATION	192	0.520686	1.80147	0	0.194672	0.81	4097	tags=44%, list=20%, signal=54%
GO_POSITIVE_REGULATION_OF_CELL_CYCLE	312	0.407858	1.68281	0	0.194762	0.92	4164	tags=35%, list=20%, signal=43%
GO_REGULATION_OF_INTRACELLULAR_ESTROGEN_RECEPTOR_SIGNALING_PATHWAY	25	0.499475	1.68382	0	0.194883	0.92	4554	tags=48%, list=22%, signal=62%
GO_NEGATIVE_REGULATION_OF_CELL_DIVISION	59	0.553412	1.77549	0	0.19498	0.84	4659	tags=53%, list=23%, signal=68%
GO_DNA_DEPENDENT_DNA_REPLICATION	90	0.667372	1.82462	0	0.195144	0.77	3435	tags=59%, list=17%, signal=70%
GO_RNA_DEPENDENT_DNA_BIOSYNTHETIC_PROCESS	20	0.632915	1.79453	0	0.19571	0.81	2947	tags=50%, list=14%, signal=58%
GO_RIBONUCLEOPROTEIN_COMPLEX_LOCALIZATION	105	0.59858	1.80827	0	0.195888	0.8	4505	tags=59%, list=22%, signal=75%
GO_G2_DNA_DAMAGE_CHECKPOINT	33	0.580259	1.79218	0	0.196168	0.81	4582	tags=52%, list=22%, signal=66%
GO_PSEUDOURIDINE_SYNTHESIS	16	0.769412	1.81327	0	0.196279	0.8	2680	tags=56%, list=13%, signal=65%
GO_PIGMENT_METABOLIC_PROCESS	56	0.493204	1.77567	0	0.196801	0.84	3068	tags=32%, list=15%, signal=38%
GO_TELOMERE_ORGANIZATION	86	0.587024	1.82993	0	0.197136	0.77	4758	tags=58%, list=23%, signal=75%
GO_RRNA_CATABOLIC_PROCESS	16	0.739522	1.81448	0	0.197455	0.8	3319	tags=69%, list=16%, signal=82%
GO_NCRNA_METABOLIC_PROCESS	458	0.599377	1.82511	0	0.197662	0.77	5259	tags=60%, list=26%, signal=79%
GO_NCRNA_TRANSCRIPTION	79	0.569557	1.78097	0	0.197882	0.83	3555	tags=42%, list=17%, signal=50%
GO_POSTTRANSCRIPTIONAL_REGULATION_OF_GENE_EXPRESSION	396	0.43152	1.65557	0	0.198594	0.93	5174	tags=44%, list=25%, signal=58%
GO_HISTONE_H3_K4_METHYLATION	27	0.554582	1.77709	0	0.198892	0.83	6414	tags=67%, list=31%, signal=97%
GO_BASE_EXCISION_REPAIR	38	0.621792	1.78562	0	0.199058	0.82	3420	tags=47%, list=17%, signal=57%
GO_NEGATIVE_REGULATION_OF_CELLULAR_AMIDE_METABOLIC_PROCESS	116	0.426619	1.65418	0	0.199402	0.94	3782	tags=37%, list=18%, signal=45%
GO_SMAD_PROTEIN_SIGNAL_TRANSDUCTION	52	0.450012	1.65266	0	0.199526	0.94	581	tags=12%, list=3%, signal=12%
GO_GENE_SILENCING_BY_RNA	111	0.577109	1.8307	0	0.199556	0.77	3714	tags=44%, list=18%, signal=54%
GO_REGULATION_OF_DNA_REPLICATION	153	0.486858	1.8096	0	0.20015	0.8	4634	tags=42%, list=23%, signal=55%
GO_PROTEIN_SUMOYLATION	109	0.55164	1.78317	0	0.200211	0.82	4147	tags=49%, list=20%, signal=61%
GO_SNRNA_PROCESSING	21	0.733669	1.77767	0	0.200287	0.83	4284	tags=76%, list=21%, signal=96%
GO_MRNA_3_END_PROCESSING	65	0.614844	1.78761	0	0.200667	0.82	4961	tags=60%, list=24%, signal=79%
GO_NEURAL_TUBE_DEVELOPMENT	144	0.462297	1.8309	0	0.202997	0.77	3386	tags=29%, list=17%, signal=35%
GO_RRNA_MODIFICATION	23	0.674584	1.64589	0	0.20322	0.95	2766	tags=48%, list=14%, signal=55%
GO_NCRNA_3_END_PROCESSING	17	0.819474	1.83586	0	0.203261	0.77	1978	tags=65%, list=10%, signal=72%
GO_CENTROSOME_DUPLICATION	32	0.647845	1.83742	0	0.203675	0.77	5368	tags=66%, list=26%, signal=89%
GO_CENTROSOME_CYCLE	45	0.642982	1.83219	0	0.204494	0.77	5390	tags=69%, list=26%, signal=93%
GO_NUCLEAR_EXPORT	131	0.575653	1.83864	0	0.205344	0.77	4505	tags=55%, list=22%, signal=70%
GO_NEGATIVE_REGULATION_OF_CHROMOSOME_SEGREGATION	27	0.65015	1.6384	0	0.207807	0.98	4565	tags=67%, list=22%, signal=86%
GO_CLEAVAGE_INVOLVED_IN_RRNA_PROCESSING	17	0.701975	1.63886	0	0.207927	0.98	4220	tags=71%, list=21%, signal=89%
GO_REGULATION_OF_CHROMOSOME_SEGREGATION	80	0.549627	1.63327	0	0.208748	0.98	4878	tags=55%, list=24%, signal=72%
GO_RNA_PHOSPHODIESTER_BOND_HYDROLYSIS_ENDONUCLEOLYTIC	46	0.624316	1.83889	0	0.209218	0.77	3653	tags=52%, list=18%, signal=63%
GO_REGULATION_OF_CHROMATIN_BINDING	16	0.620174	1.62532	0	0.216722	0.98	4726	tags=75%, list=23%, signal=97%
GO_MITOTIC_G2_M_TRANSITION_CHECKPOINT	18	0.646636	1.62547	0	0.217497	0.98	4582	tags=56%, list=22%, signal=72%
GO_NEGATIVE_REGULATION_OF_CELL_CYCLE	405	0.365212	1.62099	0	0.217523	0.98	4164	tags=31%, list=20%, signal=38%
GO_RNA_PHOSPHODIESTER_BOND_HYDROLYSIS_EXONUCLEOLYTIC	32	0.703296	1.84184	0	0.217689	0.74	3319	tags=59%, list=16%, signal=71%
GO_ORGANELLE_FISSION	456	0.473075	1.62243	0	0.218366	0.98	5721	tags=51%, list=28%, signal=69%
GO_DNA_REPLICATION	192	0.622736	1.84313	0	0.219687	0.74	3674	tags=54%, list=18%, signal=65%
GO_MEIOTIC_CELL_CYCLE	169	0.463032	1.6152	0	0.222308	0.98	4634	tags=39%, list=23%, signal=50%
GO_MRNA_CIS_SPLICING_VIA_SPLICEOSOME	16	0.690018	1.84326	0	0.224264	0.74	3920	tags=63%, list=19%, signal=77%
GO_REGULATION_OF_GENE_SILENCING	46	0.581863	1.85332	0	0.226297	0.71	3677	tags=54%, list=18%, signal=66%
GO_RNA_SECONDARY_STRUCTURE_UNWINDING	36	0.641522	1.84421	0	0.227416	0.74	3226	tags=53%, list=16%, signal=63%
GO_POSITIVE_REGULATION_OF_HISTONE_METHYLATION	30	0.555448	1.60036	0	0.228557	0.99	5173	tags=60%, list=25%, signal=80%
GO_REGULATION_OF_RESPONSE_TO_DNA_DAMAGE_STIMULUS	131	0.433762	1.60482	0	0.228882	0.98	4147	tags=40%, list=20%, signal=49%
GO_NUCLEIC_ACID_PHOSPHODIESTER_BOND_HYDROLYSIS	219	0.52033	1.8461	0	0.229078	0.73	4980	tags=49%, list=24%, signal=64%
GO_REGULATION_OF_MITOTIC_CELL_CYCLE	441	0.403161	1.59914	0	0.229402	0.99	4659	tags=35%, list=23%, signal=44%
GO_CHROMATIN_MODIFICATION	490	0.467396	1.85388	0	0.230317	0.71	4147	tags=38%, list=20%, signal=47%
GO_OLFACTORY_LOBE_DEVELOPMENT	34	0.569823	1.85414	0	0.235199	0.71	3230	tags=32%, list=16%, signal=38%
GO_REGULATION_OF_CELL_CYCLE_PHASE_TRANSITION	309	0.43111	1.58596	0	0.238216	0.99	4582	tags=36%, list=22%, signal=46%
GO_ORGANELLE_ASSEMBLY	447	0.362346	1.58715	0	0.238406	0.99	5063	tags=36%, list=25%, signal=47%
GO_DNA_RECOMBINATION	190	0.602361	1.85474	0	0.240317	0.71	4142	tags=53%, list=20%, signal=65%
GO_DNA_REPAIR	423	0.539891	1.85838	0	0.241814	0.71	4290	tags=46%, list=21%, signal=57%
GO_DNA_TEMPLATED_TRANSCRIPTION_TERMINATION	90	0.619172	1.86032	0	0.244556	0.7	5646	tags=70%, list=28%, signal=96%
GO_FORELIMB_MORPHOGENESIS	39	0.46191	1.57524	0	0.244563	0.99	1779	tags=23%, list=9%, signal=25%
GO_DNA_DEPENDENT_DNA_REPLICATION_MAINTENANCE_OF_FIDELITY	19	0.721808	1.86095	0	0.248598	0.7	3094	tags=63%, list=15%, signal=74%
GO_RESPONSE_TO_FIBROBLAST_GROWTH_FACTOR	112	0.414924	1.61866	0.0140845	0.21912	0.98	4107	tags=33%, list=20%, signal=41%
GO_NUCLEAR_TRANSPORT	322	0.405319	1.66055	0.0147059	0.193574	0.92	4505	tags=39%, list=22%, signal=49%
GO_FIBROBLAST_GROWTH_FACTOR_RECEPTOR_SIGNALING_PATHWAY	82	0.464245	1.66747	0.0149254	0.190032	0.92	3971	tags=34%, list=19%, signal=42%
GO_REGULATION_OF_CELL_DIVISION	248	0.40899	1.66553	0.0149254	0.190159	0.92	5057	tags=38%, list=25%, signal=50%
GO_POSITIVE_REGULATION_OF_DNA_METABOLIC_PROCESS	173	0.445882	1.69763	0.0151515	0.186787	0.92	4150	tags=35%, list=20%, signal=43%
GO_CELLULAR_RESPONSE_TO_IONIZING_RADIATION	50	0.488843	1.72404	0.0151515	0.19118	0.91	4014	tags=40%, list=20%, signal=50%
GO_REGULATION_OF_DNA_BIOSYNTHETIC_PROCESS	87	0.454631	1.61186	0.0151515	0.223835	0.98	4107	tags=37%, list=20%, signal=46%
GO_REGULATION_OF_DNA_METABOLIC_PROCESS	315	0.450625	1.7438	0.0153846	0.179748	0.9	4451	tags=38%, list=22%, signal=48%
GO_POSITIVE_REGULATION_OF_GENE_EXPRESSION_EPIGENETIC	61	0.535301	1.76539	0.0153846	0.184679	0.87	4621	tags=49%, list=23%, signal=63%
GO_POSITIVE_REGULATION_OF_RESPONSE_TO_DNA_DAMAGE_STIMULUS	58	0.497099	1.71487	0.0153846	0.191618	0.91	4147	tags=47%, list=20%, signal=58%
GO_NUCLEUS_ORGANIZATION	125	0.480113	1.77416	0.0153846	0.192488	0.84	2834	tags=32%, list=14%, signal=37%
GO_POSITIVE_REGULATION_OF_CELL_CYCLE_PHASE_TRANSITION	67	0.474402	1.63898	0.0153846	0.208843	0.98	4164	tags=40%, list=20%, signal=50%
GO_REGULATION_OF_HEART_MORPHOGENESIS	27	0.547887	1.63511	0.0153846	0.210977	0.98	2855	tags=30%, list=14%, signal=34%
GO_PROXIMAL_DISTAL_PATTERN_FORMATION	31	0.547552	1.77575	0.015625	0.199037	0.84	1733	tags=23%, list=8%, signal=25%
GO_EMBRYONIC_DIGIT_MORPHOGENESIS	60	0.50005	1.83982	0.015625	0.211378	0.76	4324	tags=37%, list=21%, signal=46%
GO_NEGATIVE_REGULATION_OF_DNA_BIOSYNTHETIC_PROCESS	30	0.565245	1.75522	0.015873	0.186152	0.88	4053	tags=43%, list=20%, signal=54%
GO_SPLICEOSOMAL_SNRNP_ASSEMBLY	35	0.705458	1.8063	0.015873	0.196173	0.81	4496	tags=77%, list=22%, signal=99%
GO_MITOTIC_CELL_CYCLE_CHECKPOINT	131	0.508009	1.69501	0.016129	0.188418	0.92	4582	tags=46%, list=22%, signal=59%
GO_NEGATIVE_REGULATION_OF_CHROMOSOME_ORGANIZATION	94	0.536785	1.76986	0.016129	0.189372	0.85	4582	tags=50%, list=22%, signal=64%
GO_NUCLEAR_TRANSCRIBED_MRNA_CATABOLIC_PROCESS_DEADENYLATION_DEPENDENT_DECAY	51	0.619428	1.84796	0.016129	0.2309	0.73	1978	tags=41%, list=10%, signal=45%
GO_REGULATION_OF_UBIQUITIN_PROTEIN_LIGASE_ACTIVITY	17	0.637158	1.71393	0.0166667	0.190056	0.91	4878	tags=65%, list=24%, signal=85%
GO_NEGATIVE_REGULATION_OF_NUCLEAR_DIVISION	45	0.553377	1.63329	0.0166667	0.209636	0.98	4659	tags=53%, list=23%, signal=69%
GO_NCRNA_PROCESSING	328	0.61151	1.76988	0.0169492	0.191269	0.85	5085	tags=62%, list=25%, signal=81%
GO_NEGATIVE_REGULATION_OF_RELEASE_OF_CYTOCHROME_C_FROM_MITOCHONDRIA	17	0.589691	1.6491	0.0169492	0.202121	0.95	4144	tags=53%, list=20%, signal=66%
GO_RESPONSE_TO_IONIZING_RADIATION	137	0.43485	1.59425	0.0169492	0.233061	0.99	4061	tags=36%, list=20%, signal=45%
GO_STRAND_DISPLACEMENT	26	0.660876	1.64268	0.0172414	0.205712	0.97	4061	tags=65%, list=20%, signal=81%
GO_NUCLEOTIDE_EXCISION_REPAIR_DNA_INCISION	38	0.573719	1.58988	0.0172414	0.235792	0.99	5884	tags=68%, list=29%, signal=96%
GO_REGULATION_OF_DNA_TEMPLATED_TRANSCRIPTION_ELONGATION	38	0.530608	1.69016	0.0175439	0.191483	0.92	5421	tags=50%, list=27%, signal=68%
GO_MITOTIC_NUCLEAR_DIVISION	336	0.504948	1.65597	0.0175439	0.198794	0.93	5707	tags=54%, list=28%, signal=74%
GO_HISTONE_MRNA_METABOLIC_PROCESS	28	0.632153	1.64392	0.0175439	0.204883	0.96	4014	tags=61%, list=20%, signal=75%
GO_DIGESTIVE_TRACT_MORPHOGENESIS	48	0.45714	1.6348	0.0175439	0.210436	0.98	1599	tags=19%, list=8%, signal=20%
GO_MITOCHONDRIAL_RNA_METABOLIC_PROCESS	23	0.71946	1.84004	0.0175439	0.215118	0.76	2766	tags=52%, list=14%, signal=60%
GO_ESTABLISHMENT_OF_MITOTIC_SPINDLE_ORIENTATION	19	0.54506	1.58449	0.0175439	0.239586	0.99	2960	tags=37%, list=14%, signal=43%
GO_REGULATION_OF_MESENCHYMAL_CELL_PROLIFERATION	33	0.519304	1.74523	0.0178571	0.181269	0.9	1057	tags=18%, list=5%, signal=19%
GO_NUCLEAR_TRANSCRIBED_MRNA_POLY_A_TAIL_SHORTENING	21	0.660851	1.76552	0.0178571	0.186228	0.87	2615	tags=43%, list=13%, signal=49%
GO_MISMATCH_REPAIR	27	0.654013	1.67662	0.0178571	0.189535	0.92	3437	tags=56%, list=17%, signal=67%
GO_NUCLEOSIDE_SALVAGE	15	0.624258	1.67145	0.0178571	0.189582	0.92	1908	tags=27%, list=9%, signal=29%
GO_REGULATION_OF_PRI_MIRNA_TRANSCRIPTION_FROM_RNA_POLYMERASE_II_PROMOTER	17	0.574987	1.6778	0.0178571	0.190898	0.92	2740	tags=41%, list=13%, signal=48%
GO_DEMETHYLATION	50	0.493019	1.71602	0.0178571	0.194046	0.91	4542	tags=36%, list=22%, signal=46%
GO_MEMBRANE_DISASSEMBLY	43	0.637978	1.82547	0.0178571	0.200069	0.77	2834	tags=53%, list=14%, signal=62%
GO_MATURATION_OF_5_8S_RRNA	26	0.671009	1.6408	0.0178571	0.207133	0.98	4289	tags=65%, list=21%, signal=83%
GO_ESTABLISHMENT_OF_MITOTIC_SPINDLE_LOCALIZATION	23	0.532612	1.58278	0.0178571	0.240821	0.99	2960	tags=35%, list=14%, signal=41%
GO_NEGATIVE_REGULATION_OF_PROTEIN_ACETYLATION	19	0.588347	1.70276	0.0181818	0.19052	0.92	2793	tags=47%, list=14%, signal=55%
GO_CELL_AGGREGATION	20	0.612062	1.80916	0.0181818	0.197607	0.8	2122	tags=25%, list=10%, signal=28%
GO_EMBRYONIC_HEMOPOIESIS	19	0.605487	1.61998	0.0181818	0.217801	0.98	171	tags=16%, list=1%, signal=16%
GO_DORSAL_VENTRAL_AXIS_SPECIFICATION	20	0.598662	1.72951	0.0185185	0.188999	0.91	1548	tags=30%, list=8%, signal=32%
GO_AMINO_ACID_ACTIVATION	47	0.64711	1.6446	0.0185185	0.204411	0.96	4562	tags=64%, list=22%, signal=82%
GO_DNA_TEMPLATED_TRANSCRIPTION_ELONGATION	88	0.53154	1.61472	0.0185185	0.222172	0.98	4217	tags=50%, list=21%, signal=63%
GO_NEGATIVE_REGULATION_OF_TRANSLATIONAL_INITIATION	18	0.599382	1.6053	0.0185185	0.229176	0.98	5619	tags=78%, list=27%, signal=107%
GO_PHOTOPERIODISM	23	0.545901	1.59548	0.0185185	0.232478	0.99	3073	tags=35%, list=15%, signal=41%
GO_RESPONSE_TO_STEROL	22	0.531166	1.6793	0.0188679	0.190725	0.92	1548	tags=23%, list=8%, signal=25%
GO_NEGATIVE_REGULATION_OF_OSTEOBLAST_DIFFERENTIATION	38	0.48719	1.62492	0.0188679	0.216204	0.98	3872	tags=37%, list=19%, signal=45%
GO_MAMMARY_GLAND_EPITHELIAL_CELL_DIFFERENTIATION	16	0.638236	1.61405	0.0188679	0.222192	0.98	825	tags=31%, list=4%, signal=33%
GO_REGULATION_OF_TRANSCRIPTION_ELONGATION_FROM_RNA_POLYMERASE_II_PROMOTER	21	0.588886	1.59059	0.0188679	0.235504	0.99	4123	tags=48%, list=20%, signal=60%
GO_NEGATIVE_REGULATION_OF_HISTONE_ACETYLATION	15	0.631231	1.66791	0.0196078	0.190441	0.92	2793	tags=53%, list=14%, signal=62%
GO_TETRAPYRROLE_BIOSYNTHETIC_PROCESS	27	0.579944	1.60326	0.0196078	0.229109	0.98	3985	tags=44%, list=19%, signal=55%
GO_DORSAL_VENTRAL_NEURAL_TUBE_PATTERNING	15	0.701863	1.72237	0.02	0.1902	0.91	1142	tags=33%, list=6%, signal=35%
GO_SULFUR_AMINO_ACID_BIOSYNTHETIC_PROCESS	19	0.688271	1.78149	0.02	0.199667	0.82	4593	tags=58%, list=22%, signal=75%
GO_DNA_REPLICATION_INITIATION	28	0.707105	1.64743	0.02	0.203777	0.95	3241	tags=64%, list=16%, signal=76%
GO_HEME_BIOSYNTHETIC_PROCESS	20	0.584733	1.57543	0.02	0.246094	0.99	3068	tags=35%, list=15%, signal=41%
GO_SOMATIC_DIVERSIFICATION_OF_IMMUNE_RECEPTORS	40	0.587733	1.64617	0.02	0.203551	0.95	2788	tags=48%, list=14%, signal=55%
GO_ZINC_II_ION_TRANSPORT	26	0.584327	1.80251	0.0204082	0.19678	0.81	2062	tags=31%, list=10%, signal=34%
GO_PEPTIDYL_LYSINE_TRIMETHYLATION	18	0.630512	1.70998	0.0217391	0.189831	0.92	6414	tags=78%, list=31%, signal=113%
GO_NUCLEOBASE_BIOSYNTHETIC_PROCESS	18	0.684135	1.7315	0.0227273	0.190822	0.91	2563	tags=56%, list=13%, signal=63%
GO_GLUTAMINE_METABOLIC_PROCESS	22	0.604537	1.7154	0.0227273	0.193664	0.91	3741	tags=45%, list=18%, signal=56%
GO_ANTERIOR_POSTERIOR_PATTERN_SPECIFICATION	184	0.375769	1.59356	0.027027	0.233157	0.99	3005	tags=21%, list=15%, signal=24%
GO_POSITIVE_REGULATION_OF_CHROMOSOME_ORGANIZATION	140	0.425365	1.57156	0.0285714	0.24849	0.99	4462	tags=40%, list=22%, signal=51%
GO_NEURAL_CREST_CELL_DIFFERENTIATION	73	0.436858	1.63599	0.030303	0.210272	0.98	2105	tags=21%, list=10%, signal=23%
GO_REGULATION_OF_GLIAL_CELL_DIFFERENTIATION	58	0.430196	1.60313	0.030303	0.228358	0.98	3699	tags=29%, list=18%, signal=36%
GO_NEURAL_CREST_CELL_MIGRATION	50	0.491276	1.68874	0.03125	0.191195	0.92	3750	tags=32%, list=18%, signal=39%
GO_POSITIVE_REGULATION_OF_TELOMERE_MAINTENANCE	42	0.549174	1.67404	0.031746	0.191872	0.92	4107	tags=48%, list=20%, signal=59%
GO_EMBRYONIC_ORGAN_MORPHOGENESIS	272	0.378811	1.62222	0.031746	0.217792	0.98	2916	tags=20%, list=14%, signal=23%
GO_REGULATION_OF_CHROMOSOME_ORGANIZATION	262	0.430862	1.59149	0.031746	0.235533	0.99	4755	tags=42%, list=23%, signal=54%
GO_EMBRYONIC_SKELETAL_SYSTEM_MORPHOGENESIS	91	0.487359	1.74842	0.0327869	0.184702	0.89	1733	tags=20%, list=8%, signal=22%
GO_SOMATIC_DIVERSIFICATION_OF_IMMUNOGLOBULINS	27	0.63432	1.72102	0.0327869	0.189574	0.91	3288	tags=59%, list=16%, signal=71%
GO_MORPHOGENESIS_OF_EMBRYONIC_EPITHELIUM	132	0.405784	1.63408	0.0327869	0.209695	0.98	3060	tags=23%, list=15%, signal=27%
GO_CHROMATIN_SILENCING	61	0.446191	1.58962	0.0327869	0.235346	0.99	4641	tags=39%, list=23%, signal=51%
GO_NUCLEAR_ENVELOPE_ORGANIZATION	75	0.528611	1.75128	0.0333333	0.185229	0.88	2834	tags=40%, list=14%, signal=46%
GO_PROTEIN_LOCALIZATION_TO_CHROMOSOME	38	0.593668	1.67776	0.0333333	0.18996	0.92	4061	tags=53%, list=20%, signal=66%
GO_POSITIVE_REGULATION_OF_DNA_TEMPLATED_TRANSCRIPTION_INITIATION	24	0.548397	1.6465	0.0333333	0.204068	0.95	4107	tags=42%, list=20%, signal=52%
GO_MULTI_ORGANISM_LOCALIZATION	61	0.540337	1.62137	0.0333333	0.218592	0.98	2906	tags=39%, list=14%, signal=46%
GO_REGULATION_OF_MRNA_3_END_PROCESSING	26	0.560519	1.58006	0.0335714	0.243139	0.99	4097	tags=50%, list=20%, signal=62%
GO_NEURAL_TUBE_FORMATION	93	0.434399	1.68238	0.0338983	0.193131	0.92	3872	tags=30%, list=19%, signal=37%
GO_NEGATIVE_REGULATION_OF_TELOMERE_MAINTENANCE_VIA_TELOMERE_LENGTHENING	17	0.651404	1.76942	0.0344828	0.188077	0.86	4021	tags=53%, list=20%, signal=66%
GO_CYTOPLASMIC_SEQUESTERING_OF_TRANSCRIPTION_FACTOR	19	0.556253	1.63421	0.0344828	0.210445	0.98	2376	tags=42%, list=12%, signal=48%
GO_NEGATIVE_REGULATION_OF_GENE_EXPRESSION_EPIGENETIC	77	0.458213	1.62132	0.0344828	0.217803	0.98	4641	tags=40%, list=23%, signal=52%
GO_CELL_CYCLE_PHASE_TRANSITION	243	0.495803	1.62356	0.0350877	0.217744	0.98	4888	tags=48%, list=24%, signal=62%
GO_MITOTIC_SISTER_CHROMATID_SEGREGATION	85	0.59063	1.65157	0.0357143	0.200167	0.94	5644	tags=66%, list=28%, signal=91%
GO_CELLULAR_METABOLIC_COMPOUND_SALVAGE	35	0.512221	1.603	0.0357143	0.227679	0.98	3463	tags=31%, list=17%, signal=38%
GO_NEGATIVE_REGULATION_OF_STEM_CELL_PROLIFERATION	15	0.586261	1.60203	0.0357143	0.228153	0.99	3087	tags=27%, list=15%, signal=31%
GO_REGULATION_OF_TRANSCRIPTION_INVOLVED_IN_G1_S_TRANSITION_OF_MITOTIC_CELL_CYCLE	25	0.663898	1.59839	0.0363636	0.229855	0.99	4150	tags=68%, list=20%, signal=85%
GO_SMOOTHENED_SIGNALING_PATHWAY	70	0.497137	1.69736	0.037037	0.18587	0.92	4983	tags=44%, list=24%, signal=58%
GO_NUCLEOTIDE_EXCISION_REPAIR	107	0.552799	1.62815	0.037345	0.214228	0.98	4276	tags=51%, list=21%, signal=65%
GO_CELLULAR_AMINO_ACID_METABOLIC_PROCESS	311	0.437871	1.74834	0.0377359	0.183199	0.89	4239	tags=34%, list=21%, signal=42%
GO_ENTRAINMENT_OF_CIRCADIAN_CLOCK_BY_PHOTOPERIOD	18	0.551034	1.60341	0.0377359	0.229767	0.98	2466	tags=33%, list=12%, signal=38%
GO_NEGATIVE_REGULATION_OF_DNA_RECOMBINATION	15	0.579288	1.61387	0.0384615	0.221591	0.98	2788	tags=47%, list=14%, signal=54%
GO_PURINE_CONTAINING_COMPOUND_SALVAGE	16	0.625266	1.57535	0.0384615	0.245291	0.99	2563	tags=38%, list=13%, signal=43%
GO_POSITIVE_REGULATION_OF_CYTOKINESIS	31	0.533743	1.57558	0.0384615	0.247434	0.99	3967	tags=42%, list=19%, signal=52%
GO_WATER_SOLUBLE_VITAMIN_METABOLIC_PROCESS	80	0.44122	1.6157	0.0392157	0.222403	0.98	1957	tags=21%, list=10%, signal=23%
GO_ALPHA_AMINO_ACID_METABOLIC_PROCESS	213	0.412093	1.68747	0.04	0.191696	0.92	3772	tags=29%, list=18%, signal=35%
GO_ALPHA_AMINO_ACID_BIOSYNTHETIC_PROCESS	73	0.508664	1.70583	0.0416667	0.19276	0.92	2296	tags=30%, list=11%, signal=34%
GO_CELLULAR_MODIFIED_AMINO_ACID_BIOSYNTHETIC_PROCESS	48	0.513532	1.67182	0.0434783	0.190098	0.92	3426	tags=42%, list=17%, signal=50%
GO_SULFUR_AMINO_ACID_METABOLIC_PROCESS	40	0.532136	1.75039	0.0444444	0.183345	0.88	4593	tags=40%, list=22%, signal=51%
GO_CELLULAR_AMINO_ACID_BIOSYNTHETIC_PROCESS	88	0.485562	1.65418	0.0444444	0.198466	0.94	2296	tags=27%, list=11%, signal=31%
GO_GLUTAMINE_FAMILY_AMINO_ACID_METABOLIC_PROCESS	62	0.439161	1.61063	0.0454545	0.224025	0.98	4297	tags=31%, list=21%, signal=39%
GO_COCHLEA_DEVELOPMENT	37	0.476325	1.60078	0.0476191	0.228745	0.99	1945	tags=22%, list=10%, signal=24%
GO_INTERSTRAND_CROSS_LINK_REPAIR	36	0.557449	1.57551	0.0491803	0.246743	0.99	3816	tags=47%, list=19%, signal=58%
