# Supplementary material for: Two Receptors, Two Isoforms, Two Cancers: Comprehensive Analysis of KIT and TrkA Expression in Neuroblastoma and Acute Myeloid Leukemia
Source: Front Oncol. 2019 Oct 18;9:1046. doi: 10.3389/fonc.2019.01046 (PMC6813278; doi:10.3389/fonc.2019.01046)
Supplement: Supplementary Table 3 — List of enriched Gene Ontology gene sets identified by GSEA in t(8;21)/inv16 AML and NB with high NTRK1 expression. SIZE- total number of gene in gene set; ES- enrichment score; NES- normalized enrichment score. [file Table_3.XLSX]

## Sheet: denBoer AML t(8;21)inv16
NAME	SIZE	ES	NES	NOM p-val	FDR q-val	FWER p-val	RANK AT MAX	LEADING EDGE
GO_NEUROTROPHIN_SIGNALING_PATHWAY	23	0.649634	2.11318	0	0.0236698	0.05	926	tags=22%, list=5%, signal=23%
GO_NEUROTROPHIN_TRK_RECEPTOR_SIGNALING_PATHWAY	15	0.725318	2.13194	0	0.0396494	0.04	926	tags=27%, list=5%, signal=28%
GO_POSITIVE_REGULATION_OF_ERYTHROCYTE_DIFFERENTIATION	23	0.643844	2.01136	0	0.0822271	0.2	2481	tags=43%, list=12%, signal=49%
GO_GRANULOCYTE_DIFFERENTIATION	15	0.735768	2.02625	0	0.0887118	0.17	234	tags=33%, list=1%, signal=34%
GO_REGULATION_OF_ERYTHROCYTE_DIFFERENTIATION	36	0.597776	1.99814	0	0.0888425	0.26	4057	tags=50%, list=20%, signal=62%
GO_CELLULAR_RESPONSE_TO_OSMOTIC_STRESS	20	0.598556	1.92997	0	0.194616	0.46	3404	tags=40%, list=17%, signal=48%
GO_PROTEIN_DEALKYLATION	27	0.60649	1.90897	0	0.216602	0.53	3379	tags=56%, list=17%, signal=66%

## Sheet: Versteeg NB
NAME	SIZE	ES	NES	NOM p-val	FDR q-val	FWER p-val	RANK AT MAX	LEADING EDGE
GO_ORGANELLE_MEMBRANE_FUSION	88	0.482802	1.77882	0	0.169568	0.84	3059	tags=39%, list=15%, signal=45%
GO_PHOSPHOLIPID_DEPHOSPHORYLATION	22	0.604153	1.80814	0	0.172232	0.77	3837	tags=55%, list=19%, signal=67%
GO_LYSOSOMAL_TRANSPORT	64	0.567044	1.88076	0	0.224824	0.57	3257	tags=41%, list=16%, signal=48%
GO_REGULATION_OF_CELLULAR_COMPONENT_SIZE	318	0.361837	1.56828	0	0.13304631	0.99	3122	tags=28%, list=15%, signal=32%
GO_RESPONSE_TO_PROSTAGLANDIN	33	0.468425	1.51196	0	0.14014965	1	4018	tags=39%, list=20%, signal=49%
GO_ENDOMEMBRANE_SYSTEM_ORGANIZATION	441	0.343704	1.57203	0	0.14040981	0.99	3504	tags=32%, list=17%, signal=38%
GO_AUTOPHAGOSOME_ORGANIZATION	40	0.486447	1.67472	0	0.1425295	0.99	4328	tags=50%, list=21%, signal=63%
GO_RESPONSE_TO_NICOTINE	49	0.464707	1.67675	0	0.14336357	0.99	2804	tags=31%, list=14%, signal=35%
GO_NEGATIVE_REGULATION_OF_SYNAPTIC_TRANSMISSION	59	0.417225	1.57253	0	0.14377217	0.99	2121	tags=25%, list=10%, signal=28%
GO_CELLULAR_RESPONSE_TO_PROSTAGLANDIN_STIMULUS	24	0.546965	1.67847	0	0.14532538	0.99	3203	tags=46%, list=16%, signal=54%
GO_PROTEIN_TARGETING_TO_PLASMA_MEMBRANE	23	0.504585	1.61325	0	0.14573951	0.99	3654	tags=43%, list=18%, signal=53%
GO_REGULATION_OF_GLUCOSE_IMPORT	56	0.405456	1.60711	0	0.15136841	0.99	2804	tags=29%, list=14%, signal=33%
GO_AXONAL_FASCICULATION	20	0.57272	1.69234	0	0.15165958	0.98	1967	tags=35%, list=10%, signal=39%
GO_INOSITOL_PHOSPHATE_METABOLIC_PROCESS	53	0.415278	1.55226	0	0.15200555	0.99	3976	tags=34%, list=19%, signal=42%
GO_VESICLE_ORGANIZATION	259	0.366018	1.58367	0	0.15713818	0.99	2913	tags=29%, list=14%, signal=34%
GO_GOLGI_TO_PLASMA_MEMBRANE_TRANSPORT	40	0.472665	1.55848	0	0.15766077	0.99	3794	tags=52%, list=19%, signal=64%
GO_PLASMA_MEMBRANE_ORGANIZATION	197	0.409208	1.65124	0	0.15780975	0.99	3504	tags=35%, list=17%, signal=42%
GO_POSITIVE_REGULATION_OF_AUTOPHAGY	73	0.43835	1.6101	0	0.1645009	0.99	2132	tags=29%, list=10%, signal=32%
GO_REGULATION_OF_DENDRITE_MORPHOGENESIS	72	0.423673	1.58425	0	0.16969311	0.99	2339	tags=29%, list=11%, signal=33%
GO_POSITIVE_REGULATION_OF_NEURON_APOPTOTIC_PROCESS	45	0.446834	1.68193	0	0.17275895	0.98	4184	tags=44%, list=20%, signal=56%
GO_POSITIVE_REGULATION_OF_GLUCOSE_TRANSPORT	40	0.423263	1.58631	0	0.17478873	0.99	2289	tags=23%, list=11%, signal=25%
GO_NEGATIVE_REGULATION_OF_TRANSCRIPTION_FACTOR_IMPORT_INTO_NUCLEUS	37	0.462455	1.68795	0	0.17593093	0.98	2442	tags=35%, list=12%, signal=40%
GO_CELLULAR_RESPONSE_TO_GLUCAGON_STIMULUS	38	0.486527	1.67866	0	0.17650114	0.99	1981	tags=26%, list=10%, signal=29%
GO_RETINAL_GANGLION_CELL_AXON_GUIDANCE	18	0.585882	1.65832	0	0.17695856	0.99	3970	tags=67%, list=19%, signal=83%
GO_REGULATION_OF_NEURON_PROJECTION_DEVELOPMENT	394	0.405046	1.69293	0	0.1835503	0.98	2744	tags=31%, list=13%, signal=35%
GO_POST_GOLGI_VESICLE_MEDIATED_TRANSPORT	80	0.423881	1.61801	0	0.18494575	0.99	4292	tags=50%, list=21%, signal=63%
GO_REGULATION_OF_VESICLE_MEDIATED_TRANSPORT	434	0.39274	1.62511	0	0.18586089	0.99	2943	tags=27%, list=14%, signal=31%
GO_CELL_DIFFERENTIATION_IN_HINDBRAIN	20	0.511557	1.66812	0	0.18599062	0.99	1779	tags=30%, list=9%, signal=33%
GO_MICROTUBULE_ANCHORING	17	0.587708	1.63576	0	0.1871466	0.99	2896	tags=53%, list=14%, signal=62%
GO_POSITIVE_REGULATION_OF_CELL_PROJECTION_ORGANIZATION	293	0.389121	1.61883	0	0.18769835	0.99	4155	tags=41%, list=20%, signal=50%
GO_DOPAMINE_RECEPTOR_SIGNALING_PATHWAY	29	0.519147	1.62045	0	0.18816371	0.99	3746	tags=45%, list=18%, signal=55%
GO_NEURONAL_ACTION_POTENTIAL	26	0.581041	1.714	0	0.18818751	0.94	4184	tags=46%, list=20%, signal=58%
GO_NEURON_PROJECTION_GUIDANCE	191	0.410853	1.65898	0	0.1887297	0.99	3879	tags=40%, list=19%, signal=49%
GO_NEGATIVE_REGULATION_OF_PROTEIN_COMPLEX_ASSEMBLY	102	0.352455	1.49693	0	0.18976669	1	2696	tags=25%, list=13%, signal=29%
GO_ORGANELLE_FUSION	117	0.447073	1.69944	0	0.19411063	0.98	3059	tags=37%, list=15%, signal=43%
GO_REGULATION_OF_DEVELOPMENTAL_GROWTH	277	0.33767	1.49241	0	0.1968466	1	2937	tags=26%, list=14%, signal=30%
GO_ORGANELLE_TRANSPORT_ALONG_MICROTUBULE	53	0.481512	1.7033	0	0.19726953	0.97	1757	tags=30%, list=9%, signal=33%
GO_MEMBRANE_FUSION	140	0.442158	1.7184	0	0.19836183	0.94	3059	tags=34%, list=15%, signal=40%
GO_NEUROTROPHIN_SIGNALING_PATHWAY	23	0.549784	1.66036	0	0.19941135	0.99	2070	tags=30%, list=10%, signal=34%
GO_NEURON_MIGRATION	103	0.352885	1.47273	0	0.2021841	1	2749	tags=27%, list=13%, signal=31%
GO_NEUROTROPHIN_TRK_RECEPTOR_SIGNALING_PATHWAY	15	0.531455	1.4625	0	0.20271416	1	18	tags=13%, list=0%, signal=13%
GO_NEURON_RECOGNITION	33	0.554403	1.72296	0	0.20325164	0.93	1995	tags=39%, list=10%, signal=44%
GO_POSITIVE_REGULATION_OF_NEURON_DEATH	65	0.371277	1.45021	0	0.20430475	1	4184	tags=42%, list=20%, signal=52%
GO_PHOSPHATIDYLINOSITOL_DEPHOSPHORYLATION	21	0.587086	1.7394	0	0.216668	0.91	3837	tags=52%, list=19%, signal=64%
GO_PROTEIN_LOCALIZATION_TO_VACUOLE	41	0.527141	1.72758	0	0.21726549	0.92	2741	tags=41%, list=13%, signal=48%
GO_POSITIVE_REGULATION_OF_AMINE_TRANSPORT	32	0.516696	1.72382	0	0.21769875	0.93	1718	tags=28%, list=8%, signal=31%
GO_POSITIVE_REGULATION_OF_NEURON_DIFFERENTIATION	291	0.381735	1.73047	0	0.22674502	0.92	2727	tags=30%, list=13%, signal=34%
GO_PROTEIN_LOCALIZATION_TO_GOLGI_APPARATUS	26	0.532768	1.74355	0	0.22731134	0.9	3107	tags=54%, list=15%, signal=63%
GO_POSITIVE_REGULATION_OF_NEURON_PROJECTION_DEVELOPMENT	226	0.416535	1.73989	0	0.22845359	0.91	2727	tags=32%, list=13%, signal=37%
GO_PROTEIN_LOCALIZATION_TO_CELL_PERIPHERY	149	0.436349	1.75725	0	0.23539038	0.88	3654	tags=38%, list=18%, signal=46%
GO_SINGLE_ORGANISM_MEMBRANE_FUSION	115	0.45783	1.79971	0	0.23656146	0.8	3059	tags=36%, list=15%, signal=42%
GO_POLYOL_CATABOLIC_PROCESS	18	0.567296	1.76108	0	0.2419209	0.88	936	tags=33%, list=5%, signal=35%
GO_CALCIUM_ION_REGULATED_EXOCYTOSIS_OF_NEUROTRANSMITTER	31	0.586405	1.76455	0	0.24252936	0.87	2659	tags=45%, list=13%, signal=52%
GO_REGULATION_OF_DENDRITE_EXTENSION	18	0.725612	1.91832	0	0.24271305	0.52	1547	tags=50%, list=8%, signal=54%
GO_ENDOSOME_TO_LYSOSOME_TRANSPORT	40	0.56387	1.80427	0	0.24399377	0.78	3216	tags=43%, list=16%, signal=50%
GO_PROTEIN_LOCALIZATION_TO_LYSOSOME	16	0.677254	1.91965	0	0.24676501	0.52	1454	tags=31%, list=7%, signal=34%
