# Supplementary material for: Two Receptors, Two Isoforms, Two Cancers: Comprehensive Analysis of KIT and TrkA Expression in Neuroblastoma and Acute Myeloid Leukemia
Source: Front Oncol. 2019 Oct 18;9:1046. doi: 10.3389/fonc.2019.01046 (PMC6813278; doi:10.3389/fonc.2019.01046)
Supplement: Supplementary Table 4 — List of differentially expressed genes in AML groups with KIT high/low and NTRK1 high/low expression. [file Table_4.XLSX]

## Sheet: AML KIT
data set	denBoer AML
Gene Name	P value	Mean of KIT high	Mean of KIT low	Difference	SE of difference	FDR q value
TRH	1.5e-05	7.759	5.537	2.222	0.5021	0.001193
CD200	<0,000001	7.745	5.526	2.219	0.3507	6e-06
ST18	4.9e-05	5.312	3.281	2.031	0.4908	0.002402
TRBV27	8e-06	9.141	7.125	2.016	0.441	0.000785
BAALC	4.5e-05	7.496	5.528	1.968	0.4733	0.002296
SHANK3	5.5e-05	7.659	5.707	1.952	0.4749	0.002589
ITGA9	6e-06	7.62	5.68	1.94	0.4194	0.000669
F2RL1	4e-06	4.656	2.767	1.889	0.3979	0.00048
IKZF2	4.2e-05	5.603	3.846	1.757	0.4211	0.002206
SMIM24	0.000202	10	8.25	1.752	0.4639	0.005884
ANGPT1	3.6e-05	8.15	6.474	1.676	0.398	0.002004
RBPMS	0.000247	5.552	3.891	1.661	0.4463	0.006671
ITM2A	0.000182	11.27	9.618	1.647	0.4331	0.005475
WT1	0.000192	7.716	6.121	1.596	0.4211	0.005704
EGFL7	2.9e-05	8.103	6.542	1.561	0.3663	0.001736
PALB2	<0,000001	5.475	3.919	1.556	0.2696	2e-05
CD34	1.6e-05	8.862	7.402	1.46	0.3309	0.001235
MAN1A1	1.5e-05	9.447	7.989	1.459	0.3303	0.001218
ZNF670	9e-06	4.441	3.015	1.426	0.3136	0.000846
JUP	1e-06	9.041	7.643	1.397	0.2796	0.000229
LRP6	6.8e-05	5.201	3.806	1.394	0.3437	0.002947
CLIP3	7.7e-05	5.303	3.913	1.39	0.3451	0.003179
NPR3	3.1e-05	8.672	7.287	1.385	0.3261	0.001825
ERG	<0,000001	7.612	6.231	1.381	0.2742	0.000206
GOLPH3L	5e-06	6.361	4.984	1.377	0.2938	0.000569
ZNF439	8.5e-05	6.723	5.355	1.369	0.3421	0.003401
ZFP30	3e-06	6.067	4.699	1.368	0.287	0.000461
RAB7B	6e-06	6.828	5.461	1.366	0.2947	0.000644
PDGFC	4.9e-05	9.169	7.811	1.358	0.3281	0.002402
EZH1	<0,000001	6.692	5.349	1.343	0.2671	0.000206
SMAD1	8.7e-05	7.765	6.429	1.335	0.3345	0.003463
ASF1A	<0,000001	7.994	6.668	1.325	0.1909	<0,000001
NOG	0.000374	7.03	5.707	1.323	0.3665	0.008552
ATP6V0A2	3.3e-05	7.029	5.708	1.322	0.3124	0.001891
PIGL	<0,000001	6.139	4.83	1.31	0.2507	0.000121
B4GALT6	3e-06	7.999	6.703	1.296	0.2707	0.000439
STK32B	0.000201	5.454	4.165	1.29	0.3413	0.00587
CSTF1	<0,000001	5.891	4.609	1.282	0.2481	0.000139
KLHL23	6e-06	4.865	3.588	1.278	0.275	0.000644
ANKRD46	<0,000001	6.23	4.954	1.276	0.2256	3e-05
ZNF559	1.5e-05	6.714	5.455	1.259	0.2844	0.001193
ZNF721	0.000132	6.829	5.593	1.236	0.3179	0.004463
FANCF	5e-05	5.306	4.077	1.228	0.2973	0.002429
MMP28	0.000313	4.76	3.532	1.227	0.3354	0.007718
STAM2	5e-05	6.284	5.061	1.223	0.296	0.002428
SUPT16H	0.000118	6.206	4.996	1.21	0.3091	0.004202
ADGRA3	0.000143	6.869	5.676	1.192	0.3084	0.004706
SYNRG	2.8e-05	6.873	5.691	1.182	0.2768	0.001716
NEDD4	<0,000001	6.773	5.594	1.179	0.2281	0.000139
RAVER2	0.000134	6.808	5.629	1.179	0.3037	0.00454
GPSM2	<0,000001	6.86	5.684	1.176	0.2222	0.000106
MEST	0.000107	10.41	9.232	1.175	0.2981	0.003936
PMS2P2	9.3e-05	5.485	4.315	1.17	0.2942	0.003628
MYRF	0.000408	5.35	4.204	1.146	0.3197	0.008972
C1orf186	0.000138	8.857	7.711	1.145	0.2956	0.004639
FAM135A	2e-06	6.321	5.18	1.141	0.2334	0.000329
ZNF704	6.8e-05	5.574	4.439	1.135	0.28	0.002962
LOC283357	7.7e-05	5.531	4.399	1.132	0.2812	0.003179
ZKSCAN7	0.000469	4.924	3.804	1.12	0.3158	0.009785
TRIM71	0.000239	6.991	5.874	1.117	0.2994	0.006522
DPY19L4	4e-06	7.554	6.451	1.103	0.2346	0.000543
TRIP11	0.000201	5.357	4.272	1.086	0.2873	0.00587
ZBTB8A	0.000114	9.368	8.285	1.082	0.2756	0.004095
DEPTOR	1.9e-05	8.381	7.3	1.08	0.2473	0.001361
DEPDC7	0.000205	6.716	5.641	1.075	0.2851	0.005921
SV2A	0.000308	6.225	5.157	1.068	0.2917	0.007693
SOS1	0.000147	6.185	5.125	1.06	0.2747	0.004772
ZNF680	<0,000001	6.452	5.394	1.057	0.1857	2.8e-05
GUCY1B3	0.000152	6.882	5.842	1.039	0.2699	0.004868
PTPRCAP	0.000273	8.431	7.397	1.035	0.28	0.00714
GEMIN5	1.3e-05	6.288	5.258	1.03	0.2312	0.001092
ZNF605	0.000481	5.583	4.555	1.028	0.2904	0.009971
ITPKB	6e-05	6.474	5.45	1.025	0.2509	0.002724
AGPAT5	<0,000001	8.511	7.488	1.023	0.1681	1.6e-05
MSH2	2.1e-05	7.532	6.51	1.021	0.2353	0.001457
NCOA7	2.3e-05	10.55	9.533	1.012	0.2342	0.001507
ZKSCAN1	1.1e-05	8.01	7.002	1.008	0.224	0.000964
SESN3	7e-06	7.628	6.625	1.003	0.2184	0.000728
CDCA7	1e-05	9.857	8.855	1.002	0.2219	0.000919
AIF1L	6.9e-05	6.821	5.822	0.9994	0.2466	0.002969
BRIP1	1.7e-05	6.348	5.353	0.9946	0.2267	0.001289
CCND2	1.9e-05	10.36	9.365	0.9914	0.2274	0.001387
ITGA6	4e-06	7.855	6.866	0.9891	0.2086	0.000485
ARHGAP25	2.9e-05	7.201	6.214	0.9864	0.2313	0.001736
TOX	0.000274	8.038	7.052	0.9861	0.2669	0.00714
ZADH2	0.00024	6.858	5.879	0.9793	0.2626	0.00654
ORC2	7.1e-05	6.227	5.249	0.9779	0.2417	0.00302
ZNF260	5.4e-05	6.1	5.127	0.9729	0.2365	0.00258
MBLAC2	4e-06	6.943	5.972	0.9705	0.2051	0.000497
AMN1	0.000138	4.743	3.78	0.963	0.2485	0.004631
CETN3	6e-06	8.076	7.116	0.9604	0.2069	0.000644
ZNF200	1e-05	6.482	5.525	0.9572	0.2124	0.000948
LIN9	0.000421	4.724	3.767	0.9572	0.2676	0.009096
EPDR1	2.4e-05	7.57	6.615	0.9553	0.2214	0.001554
ZNF609	9.6e-05	5.637	4.689	0.9482	0.2389	0.003658
KIF11	0.000195	7.023	6.076	0.9467	0.2501	0.005753
ZC3HAV1L	2e-06	7.467	6.523	0.9441	0.1925	0.000321
SORL1	0.000218	10.84	9.909	0.9332	0.2485	0.006116
SHPRH	3e-06	7.492	6.561	0.931	0.1946	0.000441
SSBP2	0.000385	9.158	8.228	0.9295	0.258	0.008668
FAM171A1	1.5e-05	7.46	6.537	0.9226	0.2086	0.001204
GPA33	0.000215	6.33	5.408	0.9224	0.2453	0.006116
ROCK2	0.000142	6.952	6.031	0.9214	0.2382	0.004706
RNF219	<0,000001	7.062	6.144	0.9187	0.1729	0.000104
RTN4R	0.000224	6.406	5.489	0.9168	0.2446	0.006228
TBXA2R	0.00048	6.564	5.647	0.9165	0.2588	0.009958
PGBD1	0.00011	5.268	4.352	0.915	0.2326	0.004009
SMARCAD1	2e-06	7.074	6.164	0.9101	0.1874	0.000366
CMTR2	1e-06	7.368	6.464	0.9045	0.1818	0.000248
LRRC8B	7e-06	7.841	6.938	0.9032	0.1967	0.000728
LOC100505501	0.000386	8.764	7.865	0.8997	0.2498	0.008668
C12orf66	0.000148	7.232	6.339	0.893	0.2315	0.004784
ZMYM1	0.000445	5.478	4.587	0.8911	0.2502	0.009459
DCUN1D4	0.000105	6.713	5.823	0.8901	0.2256	0.003885
GIMAP6	0.000468	6.657	5.769	0.8881	0.2503	0.009777
CENPQ	0.000228	5.232	4.349	0.8829	0.2358	0.006311
SLC39A10	<0,000001	7.849	6.968	0.8806	0.1481	1.7e-05
NLK	0.000355	7.513	6.633	0.8799	0.2428	0.008264
FAN1	<0,000001	7.888	7.01	0.8787	0.1677	0.00012
FGFR1OP2	<0,000001	8.309	7.431	0.8784	0.1668	0.000118
LRIF1	0.000147	6.283	5.405	0.8783	0.2276	0.004772
ZNF613	8.5e-05	3.85	2.974	0.8762	0.2191	0.00341
KCTD3	0.000286	6.82	5.945	0.8754	0.2377	0.007329
TFDP2	<0,000001	8.715	7.841	0.8742	0.173	0.000201
GRAP	7.7e-05	4.84	3.968	0.8722	0.2168	0.003208
NKIRAS1	0.000278	5.255	4.383	0.8714	0.2361	0.007185
OSBPL3	0.000194	6.522	5.655	0.8673	0.229	0.005732
TSEN54	4.9e-05	7.801	6.936	0.8652	0.2092	0.00241
ZNF420	0.00038	5.504	4.641	0.8632	0.2394	0.008619
ZNF550	<0,000001	7.013	6.153	0.8606	0.1426	1.7e-05
FAM117A	1e-06	10.16	9.303	0.8574	0.1728	0.000262
TRMT13	5.3e-05	7.095	6.24	0.8547	0.2075	0.002545
RCBTB1	<0,000001	8.928	8.076	0.8525	0.158	8.4e-05
TNFRSF1A	<0,000001	8.458	7.606	0.8522	0.1649	0.000139
ZNF175	3.4e-05	5.837	4.984	0.8522	0.2017	0.001917
C5orf30	5.7e-05	7.074	6.226	0.8478	0.2068	0.002606
KLHL6	3e-06	7.857	7.014	0.8433	0.1758	0.000434
KIAA1586	2.4e-05	6.49	5.647	0.8429	0.1957	0.001579
RFX7	<0,000001	8.478	7.636	0.8423	0.1277	3e-06
ZBTB41	9e-06	6.43	5.59	0.8398	0.185	0.000864
ASUN	<0,000001	8.995	8.162	0.8329	0.1424	1.7e-05
MBTD1	<0,000001	9.019	8.187	0.8319	0.1313	6e-06
GOPC	<0,000001	7.216	6.384	0.8317	0.1644	0.000201
BET1	2e-06	7.014	6.184	0.8296	0.1696	0.000328
PRKCQ	0.000103	7.924	7.096	0.8288	0.2097	0.003814
RBM4B	0.000307	6.053	5.231	0.822	0.2243	0.007692
MIB1	<0,000001	8.115	7.295	0.8205	0.1549	0.000106
ZKSCAN4	0.000141	6.216	5.396	0.8198	0.2119	0.004705
C2CD2	9e-06	7.18	6.363	0.8172	0.18	0.000861
ALG12	0.000299	4.948	4.133	0.8146	0.2219	0.007564
ZER1	0.000129	4.184	3.371	0.813	0.2088	0.004405
RABEP1	<0,000001	7.506	6.694	0.8128	0.1533	0.000106
PARP11	9.4e-05	6.741	5.931	0.8104	0.2039	0.003649
AKAP11	<0,000001	8	7.191	0.8091	0.1377	1.7e-05
MID1	0.000316	5.647	4.838	0.8088	0.2212	0.00774
GPATCH1	0.000274	6.159	5.354	0.8044	0.2177	0.007145
PHF6	8e-06	8.48	7.677	0.8031	0.176	0.000803
SERINC5	2.8e-05	8.101	7.3	0.8013	0.1875	0.001707
RMI1	0.000306	6.57	5.77	0.8004	0.2184	0.007681
LSM11	<0,000001	6.293	5.496	0.7975	0.156	0.000172
NHLRC3	0.000248	6.948	6.152	0.796	0.2139	0.006684
RFXAP	2.8e-05	7.363	6.568	0.7953	0.1861	0.001707
TRNT1	2e-06	7.325	6.534	0.7908	0.1628	0.000366
PEX3	<0,000001	7.039	6.249	0.7898	0.1518	0.000126
ZNF227	<0,000001	6.62	5.839	0.7803	0.155	0.000206
ATF1	3.2e-05	7.939	7.159	0.7799	0.1839	0.001842
ZNF140	0.000218	6.757	5.977	0.7799	0.2077	0.006116
IREB2	<0,000001	8.816	8.038	0.7777	0.1427	6.8e-05
CRNKL1	5.6e-05	6.8	6.024	0.776	0.1891	0.002598
RUNX1	0.000265	8.554	7.782	0.7725	0.2086	0.00697
CHD6	5e-06	7.131	6.359	0.772	0.1644	0.00055
SLC30A6	0.000367	6.525	5.754	0.7713	0.2133	0.008461
CASP8AP2	7e-06	6.692	5.921	0.7709	0.1675	0.00072
P2RY8	5.9e-05	9.783	9.014	0.7692	0.1879	0.002668
TNRC18	3e-06	8.993	8.226	0.7665	0.1597	0.000434
GTF3C4	0.00045	5.854	5.089	0.7649	0.2149	0.009523
ERCC6L2	0.00037	6.37	5.609	0.7615	0.2108	0.008495
ATP6V1C1	0.000459	7.079	6.318	0.76	0.2139	0.009648
ANKRD17	0.000413	6.603	5.844	0.7597	0.212	0.009038
SLC45A3	0.000184	7.912	7.155	0.7573	0.1993	0.005521
LYSMD3	3e-05	7.193	6.437	0.7563	0.1778	0.00177
FANCL	<0,000001	8.506	7.75	0.7558	0.1487	0.000189
TIA1	0.00041	8.62	7.868	0.7517	0.2097	0.008996
FAM98B	1e-06	8.065	7.316	0.7492	0.15	0.00023
BLZF1	3.7e-05	7.196	6.448	0.7487	0.1781	0.002041
C17orf80	3e-06	7.112	6.367	0.7441	0.1545	0.000422
ZNF74	0.000166	5.737	4.994	0.7421	0.1939	0.005165
NHLRC2	8e-06	6.077	5.337	0.7401	0.1618	0.000775
LINC00294	1.9e-05	7.399	6.665	0.734	0.168	0.001361
PLEKHA5	0.000313	7.516	6.783	0.7332	0.2004	0.007718
MACF1	<0,000001	9.85	9.118	0.7323	0.1249	1.7e-05
ACADSB	0.000351	6.218	5.486	0.7312	0.2016	0.008211
TTC7B	1.2e-05	7.817	7.087	0.7304	0.1629	0.001004
GALNT7	<0,000001	9.074	8.345	0.7293	0.1442	0.000201
HS2ST1	0.000149	7.196	6.467	0.7293	0.1892	0.004785
SLC5A3	9e-06	9.263	8.534	0.7286	0.1609	0.000894
ZNF146	<0,000001	9.084	8.36	0.7236	0.1385	0.000121
CD2AP	0.000124	8.222	7.499	0.7229	0.1852	0.004321
JRKL	0.000147	6.231	5.508	0.7228	0.1872	0.004772
MRPL46	7.8e-05	7.232	6.509	0.7223	0.1796	0.003208
TRIM24	3e-06	9.198	8.476	0.722	0.1506	0.000435
CASP3	<0,000001	8.027	7.309	0.7183	0.1416	0.000197
LYRM7	0.000117	8.298	7.584	0.7147	0.1824	0.004163
SMAD4	<0,000001	7.643	6.931	0.7116	0.1358	0.00012
ARHGAP35	0.000234	6.978	6.27	0.708	0.1895	0.006436
ZNF770	<0,000001	8.17	7.463	0.7066	0.127	4.5e-05
TGIF2	<0,000001	6.925	6.221	0.7032	0.1327	0.000106
CCM2	<0,000001	7.559	6.857	0.7023	0.1182	1.7e-05
FAM179B	2e-06	6.728	6.026	0.7019	0.1454	0.000408
PDE3B	3e-06	7.214	6.517	0.6965	0.1458	0.000451
BUB1B	6.7e-05	7.447	6.751	0.6954	0.1713	0.002932
KDM5B	2.2e-05	9.43	8.735	0.695	0.1606	0.00149
ALS2	4.2e-05	7.746	7.052	0.6933	0.166	0.002185
PLAGL1	2.4e-05	9.87	9.177	0.6929	0.1608	0.001573
HPS4	8.9e-05	6.775	6.083	0.6926	0.1737	0.003495
FAM216A	0.000111	8.272	7.58	0.6923	0.176	0.004009
MANEA	1.9e-05	6.068	5.378	0.6904	0.158	0.001361
LRBA	0.000125	8.004	7.314	0.6902	0.1769	0.004341
ZBED3	7.4e-05	8.373	7.691	0.6818	0.169	0.003128
ZNF33A	3e-06	7.98	7.3	0.6801	0.1417	0.000433
ABCD3	<0,000001	8.384	7.705	0.6793	0.125	7.1e-05
NFXL1	0.000163	6.244	5.566	0.6787	0.1771	0.005096
PRKACB	0.000167	9.642	8.966	0.6763	0.1768	0.005178
SEC23IP	3.2e-05	7.297	6.621	0.6761	0.1594	0.001841
GMCL1	<0,000001	8.259	7.585	0.6748	0.1227	6.1e-05
ZNF708	0.000237	6.601	5.926	0.6747	0.1807	0.006475
RALA	<0,000001	9.081	8.408	0.6733	0.134	0.000207
SLC26A2	0.000477	7.691	7.018	0.6733	0.19	0.009905
ZNF84	7e-06	7.656	6.988	0.6684	0.145	0.000706
TRMT11	1e-06	7.637	6.97	0.6676	0.1347	0.000267
MRPS31	5.4e-05	8.033	7.368	0.665	0.1617	0.002584
NEMP1	6.5e-05	7.228	6.565	0.6633	0.1632	0.002886
TUBGCP3	7e-06	8.103	7.443	0.6595	0.1431	0.000708
HMG20A	<0,000001	7.671	7.012	0.6592	0.1134	1.9e-05
HELLS	0.000106	7.273	6.615	0.6584	0.167	0.003932
TRIM5	1.5e-05	7.509	6.852	0.6579	0.1488	0.001204
CASD1	1.1e-05	6.897	6.24	0.657	0.1462	0.000981
PKD2	0.000357	7.912	7.256	0.6562	0.1811	0.008277
LOC100507431	0.000281	6.62	5.967	0.6531	0.1771	0.007216
DNA2	0.000396	6.283	5.632	0.651	0.1811	0.008792
RBM12B	8.7e-05	5.899	5.249	0.6499	0.1627	0.003437
MDM1	4.6e-05	8.069	7.419	0.6498	0.1564	0.002321
LNPEP	0.000133	8.39	7.742	0.648	0.1668	0.004499
TNRC6B	4.4e-05	8.473	7.825	0.6476	0.1554	0.00224
LARP4	1.7e-05	7.123	6.476	0.6474	0.1476	0.001289
GBP3	0.000313	6.785	6.138	0.6469	0.1768	0.007718
SLC25A40	0.000411	8.112	7.468	0.6448	0.1799	0.009019
OXR1	5.6e-05	7.713	7.069	0.6442	0.157	0.002599
CASP6	0.00027	8.366	7.722	0.6438	0.1741	0.007101
VAV3	1.1e-05	8.415	7.772	0.6433	0.1435	0.001004
AK6	3.6e-05	8.145	7.505	0.6405	0.152	0.001997
SH3RF1	9.9e-05	6.77	6.13	0.6405	0.1617	0.003733
ZNF43	1.3e-05	8.283	7.643	0.6395	0.1437	0.001116
DCK	1.2e-05	9.124	8.487	0.6365	0.1425	0.00105
HAUS6	0.00011	6.976	6.34	0.6355	0.1615	0.004002
PUM2	<0,000001	9.261	8.627	0.634	0.1107	2.4e-05
LOC93622	1.9e-05	7.532	6.898	0.634	0.1453	0.001377
THAP5	5.2e-05	6.964	6.331	0.6337	0.1537	0.002513
DPY19L3	3e-06	8.004	7.371	0.6334	0.1326	0.000451
GLS	1.5e-05	9.145	8.514	0.6317	0.143	0.001215
UNC119B	3e-06	8.751	8.12	0.6308	0.1324	0.000461
KIAA1147	<0,000001	8.652	8.023	0.6299	0.1156	6.8e-05
ESF1	<0,000001	6.747	6.119	0.628	0.1198	0.00012
ORC5	2.8e-05	6.758	6.131	0.6277	0.1468	0.001707
KMT2A	2e-05	7.918	7.291	0.6266	0.144	0.001405
ITGA4	0.000253	10.32	9.695	0.6255	0.1683	0.006766
CRLF3	<0,000001	9.109	8.485	0.6241	0.106	1.7e-05
NR2C2	<0,000001	8.649	8.025	0.6239	0.1053	1.7e-05
MESDC2	3.9e-05	8.418	7.794	0.6237	0.1487	0.002097
FAM73A	6e-06	7.166	6.543	0.6225	0.1342	0.000644
ZSCAN30	0.00031	6.873	6.251	0.6225	0.17	0.007693
CBX5	3.7e-05	9.063	8.442	0.6208	0.1475	0.002012
FBXW2	0.000188	8.267	7.648	0.6184	0.1629	0.005595
IFI16	0.000222	9.831	9.213	0.6176	0.1646	0.006195
ZNF468	0.000109	7.184	6.567	0.6175	0.1569	0.003972
S100PBP	0.000119	7.629	7.012	0.617	0.1576	0.004207
SETDB1	0.000207	7.22	6.603	0.6166	0.1636	0.005929
CCDC88A	7e-05	7.529	6.915	0.6142	0.1518	0.00302
CDCA7L	0.000414	9.115	8.501	0.6139	0.1714	0.009046
ANGEL2	<0,000001	8.035	7.424	0.6106	0.12	0.000188
GOLGA5	<0,000001	7.274	6.664	0.61	0.117	0.000125
GNPTAB	<0,000001	9.945	9.335	0.6099	0.1119	6.8e-05
MAML3	2.5e-05	7.369	6.759	0.6095	0.1417	0.001591
TRAPPC6B	0.000306	7.153	6.545	0.6074	0.1657	0.007674
FAM219B	0.000154	7.739	7.133	0.6063	0.1576	0.004914
N4BP2L1	0.000256	8.41	7.803	0.6063	0.1633	0.006803
FHL3	5.7e-05	7.646	7.041	0.6052	0.1476	0.002606
RNF111	6.1e-05	7.704	7.1	0.604	0.1479	0.002725
GPALPP1	2.9e-05	7.213	6.61	0.6031	0.1415	0.001736
NUP35	3.2e-05	7.535	6.932	0.6024	0.142	0.001829
LTN1	<0,000001	7.807	7.205	0.6018	0.1197	0.000206
PDHX	0.000439	7.348	6.748	0.6006	0.1684	0.009369
UPF2	<0,000001	8.433	7.833	0.6004	0.1019	1.7e-05
TNKS	1.7e-05	6.387	5.787	0.6003	0.1366	0.001289
SKP2	1.8e-05	7.76	7.16	0.6002	0.1369	0.0013
CLDN15	9.8e-05	7.632	7.032	0.6002	0.1514	0.003698
EDRF1	8.7e-05	7.109	6.51	0.5998	0.1501	0.003437
NUDCD1	0.0001	7.649	7.054	0.5957	0.1505	0.003749
XPO7	9.6e-05	8.018	7.423	0.5949	0.1499	0.003667
SRBD1	0.000299	7.381	6.79	0.5915	0.1611	0.007564
ZNF320	0.000144	7.129	6.537	0.5914	0.153	0.004717
FGFR1OP	2.4e-05	7.771	7.182	0.5892	0.1367	0.001573
PROSER1	0.000287	8.376	7.788	0.5886	0.1598	0.007338
TSHZ1	5.4e-05	7.655	7.066	0.5885	0.143	0.002567
PPIP5K2	<0,000001	9.632	9.044	0.5879	0.1129	0.000125
PDIK1L	4.7e-05	7.013	6.426	0.5876	0.1417	0.00235
UBR3	0.000177	7.364	6.777	0.5864	0.1538	0.005379
MAT2A	0.000107	9.859	9.274	0.5855	0.1486	0.003946
ATE1	0.000113	7.469	6.884	0.5852	0.149	0.004089
PHAX	0.000185	6.735	6.15	0.5852	0.1541	0.005547
CUL1	6.6e-05	7.793	7.209	0.5843	0.1437	0.002886
MYO5C	0.000256	7.635	7.052	0.5839	0.1572	0.006797
ZNF121	4.8e-05	9.576	8.992	0.5834	0.1409	0.002387
BDP1	<0,000001	8.234	7.651	0.5824	0.115	0.000201
STK39	0.000471	7.179	6.598	0.5811	0.1639	0.009813
NPAT	0.000313	6.809	6.231	0.5783	0.158	0.007718
TAF4	8.1e-05	7.591	7.014	0.5773	0.1439	0.003318
XRN1	7e-06	8.329	7.752	0.5766	0.1254	0.000721
ZC3H13	5e-06	7.567	6.991	0.5764	0.1236	0.000611
C5orf51	1.7e-05	6.86	6.284	0.5764	0.1312	0.001289
MIS18A	0.000406	7.326	6.749	0.5764	0.1606	0.008958
BAZ2B	0.000323	7.577	7.002	0.5757	0.1577	0.007821
EP400	4e-06	7.103	6.53	0.5739	0.1212	0.000494
APPL1	7e-06	7.946	7.372	0.5739	0.1248	0.000721
STK26	3e-06	10.82	10.25	0.573	0.1193	0.000433
DENND4C	9.5e-05	8.174	7.602	0.5721	0.1441	0.003658
MTM1	7e-06	6.967	6.397	0.5702	0.1242	0.00073
NIN	0.000113	8.547	7.977	0.5696	0.145	0.004081
ELK4	<0,000001	8.051	7.482	0.5695	0.1042	6.8e-05
RSBN1L	0.000129	7.197	6.629	0.5677	0.1458	0.004405
ELMO1	0.000161	8.01	7.442	0.5672	0.1479	0.005039
KIF2A	2.3e-05	7.774	7.208	0.5659	0.1309	0.001505
SCO1	0.000189	7.069	6.505	0.5643	0.1488	0.00564
PEAK1	5.7e-05	7.212	6.648	0.564	0.1375	0.002604
MARCH7	3e-06	9.944	9.38	0.5639	0.1186	0.000469
TTC4	0.00037	6.467	5.904	0.5628	0.1558	0.008495
GOLPH3	2e-06	10.11	9.545	0.5621	0.1142	0.000303
RCN2	1.2e-05	9.47	8.909	0.561	0.1252	0.001004
RFC3	0.000217	7.814	7.254	0.5603	0.1491	0.006116
AP4S1	0.000216	7.317	6.757	0.5599	0.149	0.006116
FASTKD3	<0,000001	7.976	7.418	0.5585	0.09655	2e-05
TMEM161B	5e-06	7.458	6.899	0.5582	0.1198	0.000618
MAT2B	6e-06	9.258	8.7	0.5582	0.1203	0.000644
RAI1	1.9e-05	9.357	8.8	0.5576	0.1278	0.001383
LINC00909	6.3e-05	6.913	6.357	0.5554	0.1362	0.002803
TACC3	0.000345	8.069	7.513	0.5554	0.1529	0.00813
VPS36	4.7e-05	8.148	7.593	0.5551	0.1338	0.00235
KPNA5	0.000124	8.474	7.919	0.5551	0.1422	0.004321
CDC23	2e-06	7.959	7.404	0.5543	0.1133	0.000328
MAX	4e-06	10.47	9.914	0.5543	0.1174	0.000517
TMEM106B	0.000388	8.109	7.555	0.5539	0.1539	0.008708
CDK8	7.4e-05	7.169	6.617	0.5519	0.1367	0.003109
ZNF506	0.000159	6.367	5.816	0.5517	0.1437	0.005011
DOCK7	0.000145	7.486	6.935	0.5512	0.1427	0.004749
UBR5-AS1	0.000201	7.287	6.736	0.5511	0.1459	0.00587
SIKE1	4.3e-05	7.132	6.581	0.551	0.1322	0.002228
ATF2	<0,000001	8.474	7.924	0.5504	0.1065	0.000139
TNFAIP8L1	<0,000001	7.766	7.216	0.5493	0.1089	0.000206
CEP68	0.000228	7.597	7.048	0.5489	0.1466	0.006315
AGL	1.3e-05	8.146	7.598	0.5483	0.1233	0.001126
APPBP2	4e-06	7.254	6.706	0.5481	0.1163	0.000529
C12orf65	0.000373	6.728	6.181	0.5469	0.1515	0.008536
CLK2	0.000155	8.261	7.714	0.5464	0.1421	0.004937
ARMCX5	8.1e-05	7.069	6.526	0.5438	0.1356	0.003318
POLR3F	1.7e-05	6.859	6.316	0.5433	0.1238	0.001289
HLTF	0.000108	8.185	7.642	0.5431	0.1379	0.003968
CUL4B	<0,000001	7.641	7.099	0.5423	0.1041	0.000125
KIAA0753	4.7e-05	7.293	6.751	0.542	0.1307	0.00235
JADE2	5.9e-05	8.133	7.591	0.5419	0.1324	0.002668
KIAA1033	1.4e-05	8.919	8.378	0.5409	0.1221	0.001191
TIMM21	0.00016	7.826	7.285	0.5406	0.1409	0.005039
PKN2	3e-06	8.191	7.651	0.5398	0.1119	0.00041
IBTK	3e-06	8.912	8.373	0.5398	0.1124	0.000433
TTI1	0.000207	7.811	7.272	0.5395	0.1431	0.005929
ANKRD13C	5.4e-05	6.902	6.363	0.5392	0.1311	0.002584
BOD1	3e-06	7.387	6.848	0.539	0.113	0.000457
FLVCR1	0.000255	7.277	6.738	0.5386	0.145	0.006797
STX6	0.000175	7.171	6.633	0.5375	0.1409	0.005358
KLHDC10	4e-06	8.41	7.873	0.5374	0.114	0.000529
TLK1	2.2e-05	8.868	8.332	0.536	0.1238	0.00148
ANP32A	3e-06	10.04	9.506	0.5358	0.1125	0.000461
ZNF138	0.000407	6.766	6.23	0.5352	0.1492	0.008972
RCOR3	<0,000001	8.724	8.189	0.535	0.1031	0.000133
VGLL4	4e-06	8.278	7.743	0.535	0.1138	0.000544
WDR36	0.000143	6.756	6.222	0.5349	0.1383	0.004706
CCDC127	7.1e-05	7.366	6.832	0.5341	0.132	0.003021
ABHD10	5.9e-05	7.717	7.183	0.5339	0.1305	0.002681
SMC3	1.1e-05	8.936	8.403	0.5332	0.1184	0.000952
TMEM128	0.000426	7.557	7.024	0.5329	0.1491	0.009189
EXOSC6	7e-05	7.63	7.097	0.5327	0.1316	0.003011
GRAMD1A	1.3e-05	8.162	7.63	0.5323	0.1197	0.001126
EEF2K	1.7e-05	7.776	7.244	0.5319	0.1211	0.001289
APPL2	1.7e-05	6.966	6.435	0.5311	0.1211	0.001289
AGPS	0.000316	8.86	8.329	0.5311	0.1453	0.00774
APC	9.4e-05	7.209	6.678	0.5307	0.1336	0.003649
SETDB2	0.000217	6.979	6.451	0.5287	0.1407	0.006116
PPP2CB	0.00014	8.954	8.427	0.5275	0.1362	0.004678
RBBP4	0.000174	9.236	8.709	0.5266	0.138	0.005338
ZRANB2	5e-06	10.13	9.6	0.5265	0.1126	0.000591
PEX11B	5e-06	7.469	6.944	0.5251	0.1125	0.000601
UBN2	3e-05	7.346	6.821	0.5247	0.1232	0.001756
ZNF7	<0,000001	7.076	6.553	0.5231	0.1018	0.000156
C12orf73	1.1e-05	7.333	6.81	0.523	0.1163	0.000975
TMEM87B	0.000329	6.87	6.348	0.5225	0.1433	0.007906
ARFGEF1	4e-06	8.238	7.716	0.5224	0.1109	0.00053
C7orf60	0.000421	6.763	6.241	0.522	0.1459	0.009096
SNAP23	2.6e-05	9.576	9.055	0.5219	0.1217	0.001652
PDCD7	<0,000001	8.062	7.541	0.5217	0.09988	0.000121
LEMD3	6.4e-05	7.982	7.461	0.5217	0.1281	0.002836
ZNF567	0.000337	6.615	6.094	0.5209	0.1432	0.008031
SCML2	2.8e-05	8.176	7.655	0.5206	0.1218	0.001707
TMEM168	0.000204	7.336	6.816	0.5201	0.1379	0.005921
FUNDC1	1e-05	8.013	7.493	0.52	0.1149	0.000898
NCAPD3	8.5e-05	7.517	6.998	0.5199	0.13	0.003406
WAPL	<0,000001	8.57	8.05	0.5197	0.09772	0.000104
ATAD1	<0,000001	8.819	8.3	0.5191	0.09935	0.000121
LRCH3	0.000142	7.222	6.704	0.5187	0.1341	0.004706
RAPGEF6	5.6e-05	8.492	7.973	0.5186	0.1263	0.002596
ZNHIT6	5e-06	7.821	7.303	0.5181	0.1107	0.000585
RBM28	<0,000001	8.196	7.679	0.5175	0.09685	9.7e-05
GNL3	0.000308	6.008	5.492	0.5158	0.1408	0.007693
CHD9	2.2e-05	9.451	8.935	0.5156	0.1191	0.001482
COMMD2	0.000217	7.126	6.611	0.5156	0.1372	0.006116
C1QTNF3	0.000224	6.777	6.262	0.5153	0.1375	0.006233
USP10	1.6e-05	7.92	7.405	0.5146	0.1168	0.001253
KAT6B	8e-06	8.565	8.05	0.5145	0.1128	0.00081
CNOT4	8.9e-05	6.754	6.239	0.5143	0.1289	0.003495
STK38L	<0,000001	8.505	7.991	0.514	0.09959	0.000141
HIF1AN	<0,000001	7.628	7.115	0.5135	0.08768	1.7e-05
ANKRD36C	7e-05	6.136	5.622	0.5135	0.1269	0.003011
AGGF1	3.9e-05	8.111	7.597	0.5132	0.1224	0.002097
ERGIC2	0.000295	8.173	7.661	0.5119	0.1393	0.007486
CROCCP2	6.5e-05	8.706	8.195	0.5115	0.1258	0.002886
PTRH2	4e-06	7.829	7.318	0.5108	0.1087	0.000544
ZC3H14	<0,000001	8.053	7.542	0.5105	0.09337	6.8e-05
TCF12	0.000136	8.433	7.923	0.5098	0.1314	0.004577
FAM214A	0.000239	8.23	7.72	0.5092	0.1365	0.006522
SLC7A1	0.000102	8.222	7.713	0.5087	0.1287	0.0038
NOL8	2e-05	8.533	8.025	0.5084	0.1169	0.001405
ZNF282	5.6e-05	6.784	6.276	0.5079	0.1238	0.002601
RAD17	<0,000001	8.152	7.644	0.5078	0.09688	0.00012
SCMH1	1.9e-05	7.938	7.434	0.5042	0.1156	0.001383
TMEM245	3.8e-05	9.019	8.515	0.504	0.12	0.002059
DUSP14	0.000192	7.224	6.72	0.504	0.133	0.005703
PEX1	0.00012	6.84	6.338	0.5022	0.1284	0.004231
ZNF143	0.000327	6.69	6.188	0.5015	0.1375	0.007862
BCR	0.000186	8.877	8.376	0.5014	0.132	0.005562
TOMM70	<0,000001	8.707	8.206	0.5013	0.08373	1.7e-05
SUCLA2	0.000434	7.717	7.217	0.5004	0.1402	0.009311
IKBKB	0.000288	8.341	7.841	0.4997	0.1357	0.007361
PCMTD2	2e-06	9.065	8.566	0.4991	0.1025	0.000351
FNDC3A	1.6e-05	8.635	8.137	0.4978	0.113	0.001259
GATC	0.000134	7.534	7.036	0.4976	0.1282	0.00454
ZBTB26	0.000178	7.297	6.8	0.497	0.1305	0.005406
ZNF85	0.000124	7.77	7.273	0.4969	0.1273	0.004321
RBAK	3.3e-05	7.328	6.832	0.4956	0.117	0.00186
ATF6	1e-06	8.253	7.759	0.4938	0.09883	0.000229
ZNF512B	6e-06	7.766	7.273	0.4928	0.1061	0.000644
GLMN	0.000115	7.143	6.652	0.4914	0.1253	0.004116
UBR2	0.000277	8.006	7.515	0.4914	0.1331	0.007172
TMX3	3.8e-05	8.169	7.68	0.4888	0.1164	0.00207
DSCR3	0.000212	7.931	7.446	0.4854	0.129	0.006063
FYCO1	0.000235	6.482	5.997	0.4852	0.1299	0.006456
WDR59	0.000171	7.483	6.998	0.4851	0.127	0.005245
TGFBRAP1	2e-06	8.382	7.897	0.4843	0.1001	0.000392
MSH6	5e-06	9.018	8.534	0.4839	0.1039	0.000621
ANAPC10	4.5e-05	7.471	6.988	0.4832	0.1162	0.0023
GTF3C2	<0,000001	8.714	8.231	0.4825	0.0955	0.000201
TRIM27	0.000108	7.863	7.381	0.482	0.1224	0.003963
CSPP1	0.000467	7.378	6.896	0.4814	0.1356	0.009759
UFL1	3e-06	8.813	8.333	0.4798	0.1005	0.000451
LATS1	0.000175	7.786	7.309	0.4776	0.1252	0.005357
CLCC1	0.000401	6.881	6.404	0.4767	0.1327	0.008861
ZNF22	2e-05	9.3	8.824	0.4757	0.1092	0.001393
ZNRD1	<0,000001	9.107	8.631	0.4756	0.08009	1.7e-05
KMT2D	1.7e-05	9.046	8.57	0.4756	0.1083	0.001289
TBC1D2B	0.000101	7.712	7.237	0.475	0.1201	0.003779
ZBTB44	0.000467	9.2	8.726	0.4744	0.1337	0.009759
AHCYL2	0.00039	7.366	6.892	0.4739	0.1317	0.008744
CCP110	4.7e-05	7.587	7.114	0.4733	0.1141	0.00235
TCEAL1	0.000224	8.051	7.579	0.4719	0.1259	0.006228
TBP	<0,000001	7.255	6.783	0.4718	0.08856	0.000102
STXBP3	1.6e-05	9.18	8.709	0.4705	0.1067	0.001245
ZNF777	0.0002	7.029	6.559	0.4702	0.1244	0.00587
CNOT6	0.000121	7.419	6.949	0.4695	0.1201	0.00425
ZFP62	7e-06	7.724	7.255	0.4691	0.1017	0.000704
MON2	9.6e-05	7.905	7.436	0.4688	0.1181	0.003658
TMEM203	0.000156	7.865	7.397	0.4685	0.1219	0.004956
ABHD4	3.6e-05	8.153	7.685	0.4673	0.111	0.002004
NARS2	0.000312	7.766	7.299	0.4672	0.1277	0.007718
RBM12	<0,000001	9.201	8.734	0.4671	0.0929	0.000206
MRPS9	0.000237	7.123	6.657	0.4665	0.1249	0.006475
API5	2.1e-05	8.579	8.113	0.4663	0.1075	0.001461
TARDBP	1.6e-05	9.308	8.844	0.4643	0.1054	0.001249
LINC00621	5.6e-05	7.609	7.147	0.4621	0.1125	0.002596
MPHOSPH10	8.1e-05	7.31	6.848	0.4619	0.1152	0.003318
ANAPC1	0.000318	7.57	7.108	0.4616	0.1263	0.007756
RSBN1	0.000469	8.481	8.02	0.4613	0.13	0.009783
ZNF765	0.000462	6.857	6.397	0.4598	0.1295	0.0097
SLC30A5	0.000218	7.556	7.097	0.4593	0.1223	0.006116
EED	7e-06	7.465	7.007	0.4576	0.09948	0.000721
BFAR	0.000205	7.509	7.052	0.4569	0.1211	0.005921
TBL1XR1	<0,000001	9.89	9.434	0.4565	0.08044	2.9e-05
MUT	4.3e-05	7.245	6.792	0.4534	0.1088	0.00224
SOCS4	4e-06	7.833	7.38	0.4528	0.09545	0.000481
FUBP1	4.2e-05	9.017	8.565	0.4526	0.1083	0.002185
USP24	6.5e-05	8.714	8.263	0.4511	0.1109	0.002875
SART3	8e-06	7.59	7.142	0.4486	0.09842	0.000814
CREB3L2	4e-06	9.456	9.008	0.4477	0.09429	0.00048
CTR9	0.000315	9.127	8.68	0.4469	0.1222	0.00774
ARCN1	2e-05	8.823	8.376	0.4463	0.1026	0.001405
PBX2	6e-06	8.89	8.444	0.446	0.09618	0.000644
HNRNPF	0.000218	8.58	8.134	0.4458	0.1187	0.006116
GALNT1	2.8e-05	9.272	8.827	0.4454	0.1042	0.001707
ZMYND11	0.000161	8.537	8.092	0.4451	0.1161	0.005039
GLOD4	5e-06	8.086	7.641	0.4449	0.09557	0.000623
PNISR	1e-05	9.835	9.39	0.4449	0.09833	0.000898
MTF2	9.2e-05	9.237	8.792	0.4448	0.1117	0.003591
NUP133	2e-06	7.833	7.39	0.4421	0.09104	0.000366
NUP205	9e-06	7.566	7.124	0.4421	0.09752	0.000877
DNAJC16	0.000178	7.296	6.854	0.442	0.116	0.005406
MED12	0.00031	7.765	7.323	0.4415	0.1206	0.007693
ZNF496	0.000119	7.96	7.519	0.4409	0.1126	0.004202
FAM217B	6.3e-05	7.173	6.732	0.4405	0.1081	0.002809
CXorf38	0.000319	7.962	7.523	0.4395	0.1203	0.007769
ZNF512	0.000455	8.03	7.591	0.4395	0.1236	0.0096
TIGD1	2.4e-05	7.236	6.799	0.4376	0.1016	0.001576
VEZT	0.000274	8.448	8.01	0.4373	0.1184	0.00714
SENP7	0.000384	7.897	7.461	0.4366	0.1212	0.008663
CNOT7	3.9e-05	10.05	9.614	0.4346	0.1036	0.002089
USO1	0.000296	8.546	8.112	0.4341	0.1182	0.00752
ABCE1	0.00023	8.637	8.204	0.4337	0.1159	0.006333
NUDT21	0.000143	9.546	9.113	0.4331	0.112	0.004706
PSMA3-AS1	2.6e-05	9.1	8.669	0.4302	0.1002	0.001636
ACTR6	0.000309	8.09	7.66	0.4299	0.1174	0.007693
FAM174A	5.5e-05	7.44	7.01	0.4293	0.1045	0.002596
LUC7L3	0.000177	10.52	10.1	0.4278	0.1123	0.005398
MRPL15	4.2e-05	9.15	8.722	0.4276	0.1024	0.00219
YTHDC2	2.9e-05	8.123	7.695	0.4274	0.1002	0.001736
AP5M1	4.1e-05	8.118	7.691	0.427	0.1021	0.002158
KDSR	3.1e-05	7.716	7.289	0.4267	0.1004	0.00181
MED23	9.7e-05	8.322	7.895	0.4265	0.1075	0.003677
UTP23	4e-05	7.863	7.437	0.4253	0.1016	0.00213
GFM1	0.000154	8.412	7.987	0.4251	0.1105	0.004914
JKAMP	0.000431	8.513	8.089	0.4239	0.1187	0.009257
NUP107	<0,000001	8.485	8.062	0.423	0.07998	0.000107
RARS	0.000229	8.155	7.732	0.423	0.113	0.006326
MGME1	0.000396	7.814	7.392	0.4214	0.1172	0.008792
TXNDC9	0.000323	8.629	8.208	0.4212	0.1154	0.007821
SYNCRIP	0.00016	10.14	9.723	0.4209	0.1097	0.005039
TDG	7.9e-05	8.905	8.486	0.4196	0.1045	0.003271
EPS15	4.6e-05	9.751	9.332	0.4195	0.101	0.002329
RALBP1	6e-05	8.28	7.861	0.4195	0.1026	0.002705
TRAPPC11	2.2e-05	7.706	7.289	0.4172	0.09625	0.001473
ZNF629	0.000394	7.416	6.999	0.4166	0.1158	0.008777
HNRNPA3	7.5e-05	10.01	9.596	0.4165	0.1033	0.003128
VAMP4	5.5e-05	7.712	7.297	0.4152	0.1011	0.002596
STAG2	1e-06	10.17	9.754	0.4137	0.08246	0.000213
TEX10	1.4e-05	7.822	7.409	0.4133	0.09327	0.001191
TGDS	0.00013	6.962	6.549	0.4131	0.1061	0.004426
AKAP9	5e-05	8.423	8.011	0.4117	0.09958	0.002417
TAF1	0.000449	7.369	6.958	0.4112	0.1155	0.009522
PHC3	2.6e-05	9.226	8.815	0.4108	0.09571	0.001637
CUL5	4.9e-05	8.51	8.1	0.4093	0.09897	0.00241
NORAD	3.7e-05	10.81	10.4	0.4092	0.09726	0.002012
GUF1	0.000257	7.085	6.676	0.409	0.1102	0.006824
VWA9	<0,000001	7.656	7.247	0.4088	0.08126	0.000206
EHMT1	0.000378	8.176	7.767	0.4088	0.1133	0.008607
ZDHHC17	8.5e-05	8.744	8.335	0.4087	0.1022	0.003406
NSL1	0.00043	8.564	8.158	0.4062	0.1137	0.009257
SEL1L	0.000131	8.289	7.883	0.4056	0.1043	0.004463
FAM103A1	0.000279	8.363	7.959	0.4047	0.1097	0.0072
WDSUB1	0.000178	8.075	7.671	0.4043	0.1061	0.005406
VAPB	3e-06	7.762	7.359	0.4035	0.08391	0.000432
NSMAF	2.5e-05	8.969	8.566	0.4029	0.09362	0.001585
PCGF3	0.000252	7.345	6.943	0.4022	0.1082	0.006757
ERCC3	7e-06	7.41	7.01	0.4006	0.08724	0.000728
VPS37A	0.000216	7.19	6.79	0.3998	0.1064	0.006116
SMARCE1	0.000157	10.31	9.915	0.3992	0.1039	0.004978
CKAP5	0.000193	7.323	6.924	0.3983	0.1051	0.005711
PANK3	2.7e-05	8.428	8.03	0.3973	0.0928	0.001695
PLCXD1	0.000482	8.471	8.074	0.3969	0.1121	0.009974
AEBP2	2e-05	8.431	8.035	0.3956	0.0908	0.001393
DHX33	0.000353	8.073	7.678	0.3949	0.1089	0.008227
EBLN3	0.000115	9.238	8.844	0.394	0.1005	0.004116
KLHL12	0.000179	7.803	7.41	0.3935	0.1034	0.005406
ZSCAN25	0.000386	7.05	6.657	0.3923	0.1089	0.008668
NFYB	5.3e-05	7.657	7.265	0.3915	0.09503	0.002534
FAM208B	2.6e-05	7.996	7.605	0.3908	0.09097	0.001627
VPRBP	0.000348	6.877	6.489	0.3879	0.1069	0.008172
DDX1	0.000362	9.344	8.956	0.3877	0.1071	0.008369
PAXIP1	9.4e-05	7.6	7.212	0.3874	0.09751	0.003649
NUP85	0.000115	7.888	7.501	0.3871	0.09868	0.004116
ZNF182	8.4e-05	6.732	6.345	0.3865	0.09653	0.003385
TMEM181	0.000179	7.976	7.59	0.3854	0.1012	0.005406
C7orf49	0.000352	7.373	6.988	0.385	0.1061	0.008213
ZNF665	0.000243	8.003	7.618	0.3848	0.1033	0.006574
RNF44	2e-05	9.074	8.69	0.3844	0.08821	0.001393
TYW1	1.7e-05	7.814	7.431	0.383	0.08709	0.001274
DDX42	3e-06	9.295	8.912	0.3829	0.07934	0.000408
CRBN	1.3e-05	9.384	9.001	0.3827	0.08577	0.001073
MRPL39	0.000319	7.696	7.314	0.3819	0.1045	0.007769
MRPS27	4.1e-05	8.621	8.239	0.3813	0.09123	0.002178
DIP2B	4.2e-05	8.091	7.71	0.381	0.09132	0.002206
SOS2	0.000262	8.525	8.145	0.3807	0.1027	0.006903
TRMT10C	0.000143	8.767	8.388	0.3794	0.09814	0.004706
CAAP1	2.9e-05	8.115	7.737	0.3781	0.0887	0.001736
MYSM1	0.000438	8.485	8.107	0.3781	0.106	0.009356
ADCK3	8.6e-05	8.786	8.408	0.3779	0.09453	0.003417
MAPK14	0.000409	8.799	8.423	0.3765	0.105	0.008988
DCP2	0.000434	8.872	8.498	0.3742	0.1049	0.009311
TMEM60	0.000206	8.237	7.863	0.3736	0.09908	0.005929
PRPF39	0.000259	7.636	7.262	0.3732	0.1006	0.006856
MAP4K5	0.000277	8.145	7.772	0.3725	0.1009	0.007172
ELP5	0.000338	7.806	7.434	0.372	0.1022	0.008041
AASDH	0.000149	6.874	6.503	0.3715	0.09636	0.004785
ZZZ3	1.8e-05	7.987	7.616	0.3703	0.0845	0.0013
PAPD4	7.6e-05	8.565	8.196	0.3691	0.0916	0.00316
ANKLE2	0.000165	8.051	7.682	0.3685	0.09623	0.005133
RNF114	1.2e-05	9.857	9.49	0.3677	0.08208	0.001007
GABPA	2.8e-05	7.758	7.392	0.3665	0.0858	0.001707
SPIN1	0.000338	9.32	8.954	0.366	0.1006	0.008041
SP2	9.6e-05	8.495	8.13	0.3655	0.09207	0.003658
BIRC6	7.5e-05	8.65	8.285	0.3648	0.09047	0.003132
GTF3C3	4e-06	8.121	7.757	0.3645	0.07734	0.000529
NEU3	1e-05	7.283	6.92	0.3633	0.08054	0.000934
CSNK1G1	0.000207	7.385	7.022	0.3625	0.09618	0.005929
ZCCHC11	3e-05	8.198	7.837	0.3618	0.08498	0.001756
SRP54	6.7e-05	7.482	7.122	0.3601	0.08873	0.002932
GLYR1	4.8e-05	8.608	8.248	0.3596	0.08684	0.002387
HNRNPH3	0.000323	10.01	9.653	0.358	0.09808	0.007821
MTR	0.000455	8.247	7.894	0.3539	0.09951	0.0096
EFCAB14	0.000116	8.639	8.287	0.3521	0.0898	0.004136
EXOC1	0.000413	8.615	8.264	0.3515	0.09809	0.009029
KLHDC2	0.000291	9.481	9.131	0.3494	0.09497	0.007404
CTDSP2	2e-06	9.675	9.326	0.3492	0.07169	0.000351
MAU2	4e-06	8.7	8.35	0.3492	0.07415	0.00053
GCC2	0.000136	8.054	7.705	0.349	0.08996	0.004577
UBXN4	0.000309	9.031	8.682	0.3488	0.09523	0.007693
FXR2	0.000261	7.282	6.935	0.3469	0.09356	0.006898
CHTOP	2.1e-05	9.203	8.856	0.3464	0.07983	0.001457
C11orf57	6e-06	7.519	7.173	0.3461	0.07468	0.000645
GPATCH8	0.000146	8.071	7.726	0.3452	0.08938	0.004752
ZNF45	0.000326	7.33	6.986	0.3439	0.09428	0.007859
FOPNL	0.000419	8.88	8.537	0.3432	0.09588	0.009096
SNX4	0.000275	8.151	7.81	0.3416	0.09249	0.007145
NCBP2	3.5e-05	8.794	8.453	0.3405	0.08069	0.001945
LRRC58	0.000379	8.646	8.306	0.3399	0.09424	0.008609
G3BP1	4.1e-05	8.768	8.429	0.3382	0.08085	0.002158
CLINT1	0.000417	9.908	9.573	0.3352	0.09362	0.00908
RPAIN	1.6e-05	8.687	8.355	0.3312	0.0753	0.001274
POLR3C	0.000205	7.791	7.46	0.331	0.08776	0.005921
DCUN1D1	0.0003	7.75	7.42	0.3301	0.08995	0.007576
CSE1L	0.000375	9.24	8.91	0.3294	0.09125	0.008552
CWC22	0.000433	7.76	7.431	0.3287	0.09206	0.009296
RPL7L1	3e-06	9.954	9.626	0.3278	0.06872	0.000457
ASH1L	0.00042	7.985	7.658	0.3264	0.09122	0.009096
NOL11	0.000125	8.794	8.469	0.3251	0.08335	0.004345
DENND6A	0.000252	9.089	8.768	0.3202	0.08615	0.006757
ASNSD1	0.000302	8.785	8.465	0.3198	0.08718	0.007607
REV1	0.000175	8.06	7.741	0.3191	0.08368	0.005358
PRPF8	5.6e-05	10.23	9.909	0.3171	0.07724	0.002598
NUMA1	6.6e-05	8.559	8.243	0.3158	0.07773	0.002906
TBC1D13	0.00044	7.7	7.389	0.3115	0.08737	0.009369
PPHLN1	0.000391	10.15	9.844	0.3105	0.08632	0.00875
ADNP	0.000394	9.185	8.875	0.31	0.08621	0.008777
GFM2	2.7e-05	8.28	7.972	0.308	0.07185	0.001667
THOC2	0.000206	8.398	8.09	0.3079	0.08167	0.005929
ZFYVE26	0.000201	7.145	6.837	0.3077	0.08147	0.00587
SLC39A9	0.00046	8.153	7.846	0.3069	0.08638	0.009661
DCTD	7e-05	8.304	7.998	0.3061	0.07561	0.003011
CSNK2A1	4.5e-05	8.844	8.542	0.3023	0.07271	0.002296
UBE4A	0.000204	9.148	8.85	0.2981	0.079	0.005921
METTL16	0.000359	8.277	7.979	0.2978	0.08223	0.008325
MAML1	7.3e-05	8.441	8.147	0.2942	0.07285	0.003087
FOXK1	0.000396	7.545	7.258	0.2873	0.07993	0.008792
HNRNPR	9.7e-05	11.29	11	0.2868	0.07232	0.003677
PHF8	8.3e-05	6.85	6.563	0.2861	0.07141	0.003357
MRPS35	0.000218	8.819	8.534	0.285	0.07588	0.006116
FASTKD2	7e-06	7.788	7.503	0.2849	0.06185	0.000708
SLC25A46	0.000236	8.739	8.457	0.2821	0.07554	0.006475
VPS4B	0.000259	8.909	8.631	0.2777	0.07487	0.006858
LETMD1	8.4e-05	9.163	8.888	0.275	0.0687	0.003385
MAK16	0.000243	7.302	7.031	0.2703	0.07253	0.006572
ATXN7L3B	9.4e-05	9.002	8.733	0.2688	0.06761	0.003641
AP3B1	0.000164	7.981	7.73	0.251	0.06552	0.005098
SF3A3	0.000437	8.406	8.162	0.2434	0.06824	0.009336
RALGAPB	0.000473	7.214	6.972	0.2423	0.06835	0.009836
PITPNB	0.000249	9.053	8.816	0.2366	0.06362	0.006704
MVK	8.6e-05	8.376	8.585	-0.2089	0.05226	0.003417
SIRT2	0.000345	7.66	7.918	-0.2574	0.07086	0.00813
RWDD1	4.8e-05	9.242	9.51	-0.2684	0.06477	0.002374
CASZ1	0.000145	6.959	7.229	-0.2702	0.06993	0.004733
SLC25A51	3.8e-05	6.372	6.666	-0.2931	0.0698	0.002065
EDF1	0.00031	10.12	10.42	-0.2986	0.08154	0.007693
ARPC2	0.000343	11.7	12	-0.2997	0.08249	0.008126
APOPT1	0.000325	9.059	9.36	-0.3008	0.08245	0.00785
GHITM	0.000426	10.07	10.37	-0.3019	0.08447	0.009189
TMA7	0.000153	12.77	13.07	-0.3024	0.07855	0.004879
KIF3B	0.000351	7.157	7.461	-0.3049	0.08405	0.008211
B2M	0.00029	13.82	14.13	-0.3103	0.08434	0.007389
SLC2A9	0.000148	6.647	6.963	-0.3161	0.08193	0.004772
SKP1	2e-05	11.97	12.29	-0.3231	0.07424	0.001405
PRKAR2A	3.2e-05	9.208	9.531	-0.324	0.07645	0.001846
TMSB4X	0.000241	13.59	13.92	-0.3241	0.08692	0.00654
YWHAZ	0.000382	11.25	11.57	-0.3249	0.09014	0.00864
COX7B	0.000226	11.32	11.65	-0.3256	0.08692	0.006276
SPG21	0.000347	9.261	9.588	-0.3269	0.09004	0.008159
HCCS	0.000393	7.131	7.461	-0.3294	0.0916	0.008775
C7orf50	0.000318	6.255	6.591	-0.3365	0.09209	0.007756
UBC	0.000147	13.59	13.93	-0.3413	0.08846	0.004772
TMED4	2.2e-05	7.756	8.1	-0.3432	0.07917	0.001473
ITPK1	9.5e-05	7.96	8.306	-0.3464	0.08722	0.003658
IFNAR2	0.000192	7.673	8.021	-0.348	0.09185	0.005704
UBB	0.000201	13.31	13.65	-0.3481	0.09215	0.00587
PTP4A2	3.1e-05	11.28	11.63	-0.3511	0.0827	0.001826
FOXN3-AS1	0.000379	5.81	6.163	-0.3535	0.09803	0.008609
BCL2L11	0.000382	8.334	8.691	-0.3577	0.09925	0.00864
SRA1	6.4e-05	8.184	8.545	-0.3604	0.08854	0.002849
GRIN2C	0.000441	6.041	6.408	-0.3673	0.103	0.009396
CIB1	1.1e-05	9.206	9.575	-0.3684	0.08181	0.000952
EMC3	0.000121	8.983	9.352	-0.3692	0.09442	0.00425
LOC101929243	1.9e-05	6.938	7.308	-0.3699	0.08473	0.001372
OAZ1	1e-05	12.6	12.97	-0.3705	0.08197	0.000912
POMP	4.4e-05	10.91	11.28	-0.3729	0.08957	0.002263
UBAP1	0.000477	7.922	8.296	-0.374	0.1056	0.009907
F8	0.000216	6.184	6.559	-0.3742	0.09956	0.006116
CHP1	5.7e-05	9.792	10.17	-0.3769	0.09196	0.002623
TSR1	0.00037	8.662	9.039	-0.3776	0.1045	0.008495
CISD3	0.000287	6.713	7.101	-0.3879	0.1053	0.007338
EBP	0.000252	7.822	8.218	-0.3953	0.1064	0.006757
SRF	0.000374	6.544	6.942	-0.3978	0.1102	0.008545
SPPL2A	0.000297	8.249	8.648	-0.3989	0.1086	0.007523
C1orf122	<0,000001	7.864	8.263	-0.399	0.07933	0.000206
IGH	0.000126	6.355	6.757	-0.4025	0.1032	0.004365
TK2	0.000241	6.094	6.499	-0.4046	0.1085	0.00654
GGTLC1	3.2e-05	6.334	6.74	-0.4063	0.09588	0.001846
PNPO	3.2e-05	7.41	7.818	-0.4074	0.09605	0.001841
DMWD	0.00014	6.304	6.712	-0.4081	0.1054	0.004678
SEC11C	0.000111	7.68	8.089	-0.4089	0.104	0.004009
ADAM33	0.000364	7.996	8.405	-0.4094	0.1132	0.008414
OR7E37P	<0,000001	6.684	7.097	-0.4134	0.07876	0.00012
HLA-C	0.000126	12.97	13.39	-0.4164	0.1068	0.004365
MYO7A	0.000339	5.139	5.556	-0.417	0.1147	0.008042
GLTP	3e-06	8.595	9.012	-0.4173	0.08704	0.000435
ATP5E	<0,000001	12.33	12.75	-0.4174	0.07181	1.9e-05
NDUFS6	0.000289	9.677	10.1	-0.423	0.1149	0.007363
NDUFA6	0.000316	9.674	10.11	-0.4361	0.1193	0.00774
LOC101926967	0.000323	6.146	6.586	-0.4402	0.1206	0.007821
NDUFB9	0.000355	10.51	10.95	-0.4418	0.1219	0.008264
DNASE1L1	0.000169	6.912	7.356	-0.4439	0.1161	0.005218
SRGN	0.000254	13.18	13.63	-0.4481	0.1206	0.006794
TCEB2	1.2e-05	10.28	10.73	-0.4524	0.101	0.001007
PRELID1	2.4e-05	9.05	9.506	-0.456	0.1058	0.001573
FOXCUT	6.7e-05	5.555	6.026	-0.4711	0.116	0.002915
FBXO33	2.8e-05	7.701	8.173	-0.4719	0.1104	0.001707
LOC100128653	9e-06	6.034	6.508	-0.4734	0.1044	0.000877
FTH1P5	0.000223	12.96	13.44	-0.475	0.1267	0.006213
C2orf69	6e-05	8.626	9.105	-0.4782	0.117	0.002702
SCAF4	0.000346	9.269	9.75	-0.4816	0.1326	0.008139
IRF2BP2	1.6e-05	12.29	12.78	-0.4825	0.1097	0.001274
GRHL2	0.000333	4.581	5.064	-0.4833	0.1327	0.007966
TMSB10	<0,000001	13.26	13.74	-0.4872	0.09063	8.6e-05
BTBD6	4.3e-05	7.383	7.87	-0.4877	0.117	0.00224
RRN3P2	0.000184	7.175	7.665	-0.4903	0.129	0.005521
ACSL3	9.3e-05	7.654	8.145	-0.4919	0.1237	0.003632
DYNLT3	5.5e-05	7.847	8.351	-0.504	0.1227	0.002596
FAM50A	6e-06	7.153	7.657	-0.5046	0.1088	0.000644
MYL6	<0,000001	12.21	12.72	-0.5061	0.08283	1.6e-05
RNASEH2C	0.000125	8.604	9.113	-0.5094	0.1305	0.004336
TUBA4A	0.000161	7.901	8.411	-0.5097	0.1329	0.005039
UQCR11	3e-06	10.89	11.4	-0.5106	0.1072	0.000461
OCIAD1	0.000384	10.62	11.14	-0.5136	0.1426	0.008663
LOC389199	4.8e-05	6.638	7.156	-0.5176	0.1249	0.002374
ABCA7	0.000215	6.161	6.679	-0.5182	0.1378	0.006116
ADAMTSL2	0.000421	1.216	1.735	-0.5187	0.145	0.009096
ATP8B1	0.00018	9.515	10.04	-0.5203	0.1367	0.005406
SPATA2L	4.4e-05	7.265	7.787	-0.5217	0.1253	0.002258
HELB	0.000412	5.63	6.162	-0.5314	0.1483	0.009026
CEBPG	<0,000001	7.562	8.094	-0.5321	0.1014	0.00012
ZFAND2A	0.000334	8.493	9.026	-0.5331	0.1464	0.007973
LONRF1	7.9e-05	7.639	8.182	-0.5431	0.1352	0.003271
FLJ30064	0.000416	4.803	5.349	-0.5455	0.1523	0.009074
MBNL1-AS1	5e-06	6.732	7.278	-0.546	0.1164	0.000557
IRAK1	1e-05	9.218	9.765	-0.5472	0.1213	0.000931
PCGF5	0.00028	7.918	8.468	-0.5497	0.149	0.007214
TRIM8	0.000217	8.755	9.305	-0.5507	0.1466	0.006116
ABHD5	7.1e-05	6.214	6.765	-0.5508	0.1362	0.003021
GALNS	1.5e-05	6.805	7.357	-0.5518	0.1247	0.001193
BRWD1-IT2	0.000464	4.91	5.464	-0.5534	0.1559	0.009725
SPA17	0.000461	4.986	5.544	-0.5581	0.1571	0.009684
CDC42SE1	2.7e-05	8.744	9.303	-0.5595	0.1308	0.001706
PRO2852	0.000131	9.185	9.745	-0.5596	0.1439	0.004463
CD63	2e-06	11.34	11.9	-0.5608	0.1137	0.000294
FAM200B	1.2e-05	7.815	8.376	-0.5611	0.1256	0.00105
MYLIP	0.000114	10	10.56	-0.5618	0.1431	0.004101
STAC3	0.000368	6.018	6.591	-0.5731	0.1585	0.008466
EMP3	0.000303	10.23	10.8	-0.5736	0.1564	0.007631
KBTBD2	7.6e-05	7.731	8.305	-0.5746	0.1427	0.003175
BTG1	0.00018	11.42	12	-0.5826	0.153	0.005406
CRAT	0.000169	6.072	6.659	-0.5866	0.1535	0.005218
LAPTM5	3e-05	12.18	12.77	-0.592	0.139	0.001756
ZFAND5	6.1e-05	10.51	11.11	-0.5933	0.1453	0.002745
TUBB7P	0.000393	1.466	2.063	-0.5975	0.1661	0.008775
C11orf44	0.000442	4.343	4.943	-0.6006	0.1685	0.009407
FBXO17	0.000237	1.867	2.47	-0.6039	0.1617	0.006475
C4orf48	3.2e-05	8.008	8.613	-0.6057	0.1429	0.001846
CCDC64B	8.1e-05	4.855	5.462	-0.6071	0.1513	0.003312
PLBD2	8.8e-05	6.583	7.194	-0.6107	0.153	0.003463
SPRED3	4.1e-05	4.867	5.481	-0.6132	0.1466	0.002163
TMEFF2	0.000345	6.157	6.77	-0.6136	0.1689	0.00813
NOXA1	0.000366	5.446	6.06	-0.6148	0.17	0.008446
PLEK	0.000343	9.551	10.17	-0.6156	0.1694	0.008126
RPS16P5	0.000143	8.251	8.868	-0.6168	0.1596	0.004709
PLA2G5	4e-05	5.376	5.999	-0.6226	0.1487	0.002133
POLE4	<0,000001	7.473	8.097	-0.6243	0.1227	0.000188
USP3	3.6e-05	9.458	10.09	-0.6358	0.151	0.002009
LOC439911	7e-06	7.308	7.945	-0.6368	0.1389	0.000742
TMEM212	0.000279	4.747	5.395	-0.6487	0.1758	0.0072
F12	0.000454	5.304	5.953	-0.6494	0.1826	0.009591
DHDH	0.000201	2.225	2.881	-0.6564	0.1738	0.00587
DDIT3	1.8e-05	7.706	8.365	-0.6591	0.1505	0.001318
PEA15	<0,000001	8.09	8.754	-0.6633	0.1238	9.3e-05
DNAJC5B	0.000118	5.472	6.138	-0.6656	0.17	0.004202
NOCT	1.1e-05	6.163	6.834	-0.6713	0.1492	0.00096
B4GALT1	4.6e-05	7.362	8.04	-0.6777	0.1632	0.002329
TMEM8B	0.000276	4.976	5.655	-0.6791	0.1839	0.007169
ZBTB24	2.5e-05	7.393	8.075	-0.6816	0.1583	0.001579
CTNNB1	0.000206	9.923	10.61	-0.6825	0.181	0.005929
IER5	3e-06	10.35	11.03	-0.6848	0.143	0.000439
NMRK2	0.000249	4.118	4.806	-0.6873	0.1847	0.006704
FOXP4	0.000447	5.108	5.799	-0.6904	0.1939	0.009494
DKFZP434A062	0.000124	2.819	3.514	-0.6953	0.1781	0.004321
KIAA1614	0.000255	2.626	3.323	-0.6972	0.1877	0.006797
ARF6	<0,000001	9.126	9.829	-0.7026	0.1251	3.6e-05
PI16	2.6e-05	5.095	5.802	-0.7069	0.1647	0.001637
NRIP3	9.6e-05	6.145	6.854	-0.7091	0.1786	0.003658
RAB24	1.7e-05	6.889	7.601	-0.712	0.162	0.001289
RELT	6e-06	7.444	8.157	-0.7126	0.1543	0.000683
TP53INP2	0.000139	7.226	7.941	-0.715	0.1845	0.004639
KIF1B	8e-05	6.483	7.2	-0.7162	0.1784	0.003281
SAT1	3.4e-05	11.62	12.34	-0.7214	0.1708	0.001919
ZBTB47	0.000127	4.829	5.559	-0.7302	0.1874	0.004374
EDN1	7.4e-05	4.645	5.376	-0.7312	0.1812	0.003109
SUSD2	0.000453	3.794	4.531	-0.7362	0.207	0.009591
SNORD4A	2e-06	6.834	7.572	-0.7373	0.1505	0.000328
GABRB2	0.000354	3.502	4.24	-0.7378	0.2035	0.008258
H2AFJ	0.000378	8.166	8.911	-0.7447	0.2064	0.008597
CNTNAP1	0.000305	4.201	4.953	-0.7515	0.205	0.007661
MYO1C	0.000131	6.884	7.641	-0.7573	0.1948	0.004463
RELB	0.000401	6.491	7.249	-0.7577	0.211	0.008861
LOC101927247	4.1e-05	4.9	5.662	-0.7622	0.1824	0.002178
SLC30A1	7.1e-05	7.108	7.874	-0.7655	0.1892	0.003021
EHD4	9e-06	6.302	7.07	-0.7684	0.1691	0.000856
PSAP	6.7e-05	10.22	11	-0.7769	0.1914	0.002922
SSMEM1	0.000345	3.568	4.347	-0.7791	0.2145	0.00813
ITPKB-IT1	0.000147	3.385	4.173	-0.7881	0.2042	0.004772
NR5A1	0.000129	3.773	4.567	-0.7938	0.2039	0.004405
ANXA2R	0.000201	6.484	7.283	-0.799	0.2115	0.00587
PDXK	2.2e-05	6.121	6.928	-0.807	0.1863	0.00148
CDKN2D	0.000272	6.492	7.312	-0.82	0.2218	0.00714
ARHGAP31	1.4e-05	4.984	5.811	-0.8274	0.1868	0.001191
CCDC88B	0.000421	5.77	6.605	-0.8349	0.2334	0.009096
TGM5	0.00034	5.156	6.002	-0.8464	0.2328	0.008073
NFKBIA	3.4e-05	11.25	12.1	-0.8513	0.2014	0.001906
HMGN3-AS1	0.000256	3.086	3.939	-0.8531	0.2297	0.006797
CADM4	0.000333	2.651	3.513	-0.8619	0.2367	0.007966
DCDC2B	6.3e-05	3.243	4.11	-0.8669	0.2127	0.002809
PAH	0.000143	2.637	3.505	-0.8674	0.2243	0.004706
HTR7	0.000418	3.926	4.793	-0.8675	0.2424	0.009096
FMNL3	0.00035	3.566	4.437	-0.8714	0.2402	0.008211
NFIL3	8.3e-05	9.227	10.11	-0.8793	0.2195	0.003359
CELSR1	0.00033	3.575	4.462	-0.8875	0.2435	0.007913
HIST1H1C	0.000435	7.89	8.779	-0.8893	0.2492	0.00932
MEIG1	0.000371	3.436	4.326	-0.8902	0.2464	0.008495
PRR7	0.000222	4.515	5.411	-0.8961	0.2389	0.006209
LOC441025	2.8e-05	3.423	4.32	-0.8963	0.2098	0.001707
BST2	5.4e-05	7.328	8.234	-0.9063	0.2202	0.002567
VCPIP1	2.8e-05	4.864	5.772	-0.9075	0.2123	0.001707
BCL10	<0,000001	7.758	8.673	-0.9151	0.1609	2.8e-05
MT1E	5e-05	6.513	7.433	-0.9201	0.2227	0.002429
DTX1	0.000391	3.508	4.432	-0.9236	0.2567	0.008748
SLC22A18	<0,000001	5.683	6.617	-0.9344	0.1737	8.6e-05
PLAUR	0.0001	8.85	9.785	-0.9352	0.2362	0.003744
ELL2	0.000333	6.434	7.382	-0.9481	0.2603	0.007966
CXCR5	0.000357	2.977	3.926	-0.9491	0.262	0.008277
FGF2	0.000158	2.187	3.137	-0.9503	0.2474	0.004997
CAMK1	0.000314	4.668	5.623	-0.9551	0.2611	0.007719
SCUBE2	0.000241	2.297	3.253	-0.9559	0.2564	0.00654
SCPEP1	0.000398	7.657	8.623	-0.9664	0.2689	0.008807
SIGLEC7	0.000176	5.01	5.983	-0.9735	0.2554	0.005379
C2	0.000119	5.012	5.986	-0.9739	0.2489	0.004216
CARD16	3e-06	7.171	8.15	-0.9792	0.2037	0.000433
S100A4	6e-06	11.54	12.52	-0.9797	0.2111	0.000644
TREML3P	0.000159	2.222	3.208	-0.9867	0.2571	0.005028
SOX6	0.000161	4.263	5.255	-0.9922	0.2586	0.005039
AOAH	0.000167	5.673	6.677	-1.003	0.2622	0.005166
EVA1C	0.000375	3.048	4.051	-1.003	0.278	0.008552
SNX7	0.000148	2.918	3.927	-1.009	0.2617	0.004784
PELI3	2.4e-05	3.223	4.233	-1.01	0.2343	0.001573
CPQ	<0,000001	5.561	6.609	-1.048	0.2075	0.000201
LOC101928710	0.000327	2.344	3.395	-1.051	0.2883	0.007862
MUC1	0.000128	5.14	6.192	-1.052	0.2701	0.004405
LILRB4	1e-06	5.213	6.269	-1.056	0.2137	0.00028
ANKRD50	9.6e-05	4.521	5.584	-1.063	0.2678	0.003658
ZCCHC24	4e-06	5.635	6.718	-1.083	0.2279	0.000474
WNT10B	0.000103	3.846	4.933	-1.087	0.2752	0.003836
PELI1	7.1e-05	8.468	9.564	-1.096	0.2709	0.003023
CYSTM1	1.1e-05	6.481	7.579	-1.098	0.2444	0.000982
CLPB	0.000323	3.67	4.782	-1.111	0.3044	0.007821
TUBB2A	0.000313	7.339	8.451	-1.112	0.3041	0.007718
ERC2	0.000102	2.216	3.334	-1.119	0.283	0.0038
CCL5	0.000273	7.68	8.804	-1.124	0.3041	0.00714
FBP1	1.2e-05	5.706	6.831	-1.126	0.2512	0.001004
FCER1G	1.7e-05	8.794	9.928	-1.134	0.2586	0.001289
PTX3	0.000458	6.783	7.917	-1.134	0.3191	0.009648
ID2B	0.0001	3.021	4.157	-1.136	0.287	0.003749
SPOCK1	2.2e-05	3.072	4.21	-1.138	0.2626	0.00148
LOC729083	3.4e-05	1.367	2.505	-1.138	0.2693	0.001917
ITGAM	2e-05	7.433	8.584	-1.151	0.2644	0.001401
S100A6	2e-06	9.767	10.92	-1.155	0.2362	0.000328
JAZF1	9.2e-05	4.778	5.936	-1.158	0.2909	0.003591
CSPG4	0.000325	1.593	2.753	-1.16	0.318	0.007854
LHFPL5	8.9e-05	2.051	3.225	-1.173	0.2942	0.003495
LDLR	<0,000001	7.483	8.667	-1.184	0.2316	0.000172
CPEB2	8.4e-05	5.893	7.081	-1.188	0.2969	0.0034
MAP3K13	2.9e-05	6.667	7.871	-1.205	0.2825	0.001736
ITGAX	0.000282	5.552	6.768	-1.216	0.3299	0.007232
LILRB3	0.000151	5.124	6.344	-1.221	0.3168	0.00483
PTK6	5.6e-05	1.577	2.804	-1.227	0.2989	0.002599
PHACTR3	0.000384	3.737	4.989	-1.252	0.3474	0.008663
BCL6	1.5e-05	7.178	8.463	-1.284	0.2901	0.001193
IL10RB-AS1	9.9e-05	2.587	3.875	-1.288	0.3252	0.003733
BASP1	0.000109	7.174	8.463	-1.29	0.3276	0.003972
IL1RN	0.000316	5.959	7.253	-1.293	0.3537	0.00774
LINC00692	9e-06	1.323	2.621	-1.298	0.2857	0.000856
BAG3	1.5e-05	5.134	6.452	-1.319	0.2983	0.00121
SH3BP5	<0,000001	6.828	8.166	-1.338	0.2482	8.4e-05
NOD2	0.000264	4.017	5.366	-1.349	0.3642	0.006942
SNX9	2.7e-05	5.322	6.678	-1.355	0.3169	0.001707
B3GNT7	9.9e-05	4.258	5.618	-1.36	0.3434	0.003728
S100A2	<0,000001	3.246	4.617	-1.371	0.2291	1.7e-05
HSPA6	0.000204	4.606	5.976	-1.371	0.3632	0.005921
KCNQ1	2.3e-05	5.057	6.443	-1.386	0.3204	0.0015
LGALS3	2e-06	8.065	9.502	-1.437	0.2936	0.000328
ZNF503	5.5e-05	6.014	7.606	-1.592	0.3876	0.002596
HK3	0.000408	3.053	4.668	-1.615	0.4502	0.008972
CPNE8	0.000168	3.937	5.561	-1.624	0.4248	0.005204
RNA45S5	2e-06	5.957	7.654	-1.697	0.3454	0.000311
MARCKS	0.000281	6.607	8.305	-1.697	0.4603	0.007216
CCL23	0.00042	4.236	5.991	-1.754	0.4902	0.009096
LAMP5	0.000123	2.701	4.795	-2.094	0.5362	0.004321
PHLDA2	<0,000001	5.107	7.259	-2.153	0.373	2e-05

## Sheet: AML NTRK1
data set	denBoer AML
Gene Name	P value	Mean of NTRK1 high	Mean of NTRK1 low	Difference	SE of difference	FDR q value
HPGD	<0,000001	7.187	4.486	2.701	0.4446	5e-06
SLC18A2	<0,000001	5.958	3.812	2.146	0.3567	6e-06
PPP1R14A	5e-06	5.028	2.911	2.117	0.4531	0.000803
HDC	<0,000001	8.26	6.199	2.061	0.3001	<0,000001
IRX1	1e-06	6.579	4.594	1.986	0.3995	0.000327
IL5RA	<0,000001	6.312	4.369	1.943	0.3348	1.5e-05
ESAM	<0,000001	5.702	3.791	1.911	0.3323	1.7e-05
CNRIP1	0.000108	7.188	5.347	1.841	0.4673	0.00552
MPL	0.00013	7.232	5.397	1.835	0.4717	0.006242
GNG11	0.00017	6.743	4.912	1.83	0.479	0.007407
ITM2A	3.3e-05	11.41	9.593	1.82	0.4302	0.002705
RBPMS	5.8e-05	5.686	3.868	1.818	0.4437	0.003755
TPSAB1	8e-05	9.542	7.729	1.813	0.4516	0.004632
SHANK3	0.000224	7.521	5.731	1.791	0.4776	0.008679
TFPI	3e-06	8.856	7.09	1.765	0.3692	0.000551
HSPG2	<0,000001	7.841	6.094	1.748	0.3426	0.000206
SGPP1	0.000172	6.956	5.224	1.732	0.4538	0.00742
HPGDS	0.000157	8.259	6.547	1.711	0.4453	0.007048
FAM69B	<0,000001	7.866	6.161	1.706	0.3274	0.000154
TNIK	<0,000001	6.86	5.168	1.692	0.3255	0.000156
TIMP3	<0,000001	5.071	3.388	1.683	0.3308	0.000208
SPINK4	<0,000001	5.593	3.969	1.624	0.2663	5e-06
HSPC324	3e-06	6.858	5.296	1.562	0.3249	0.000522
CXCL3	0.00012	8.508	6.949	1.559	0.3987	0.005915
CAV1	3.3e-05	6.802	5.246	1.556	0.3675	0.002689
GNAI1	3e-05	7.539	6.007	1.532	0.3601	0.002561
EDIL3	4.9e-05	5.952	4.422	1.53	0.3699	0.003416
EGFL7	4.4e-05	8.075	6.547	1.528	0.3669	0.003186
LIF	<0,000001	5.288	3.788	1.5	0.292	0.000181
BCAT1	0.000102	9.085	7.596	1.489	0.3768	0.005371
MMP28	1.2e-05	4.974	3.495	1.479	0.3311	0.00143
TGFB1I1	2e-06	6.456	5.025	1.431	0.2905	0.000369
LRP6	4.4e-05	5.23	3.801	1.428	0.3431	0.003186
PPP1R16B	8.4e-05	8.111	6.692	1.419	0.3545	0.004716
JUP	<0,000001	9.057	7.641	1.417	0.2792	0.000217
SMAGP	<0,000001	6.414	5.02	1.393	0.2739	0.000208
PEAR1	2e-06	5.997	4.606	1.391	0.2822	0.000367
TAL1	3.2e-05	7.698	6.335	1.363	0.3212	0.002654
MAF	0.000198	5.575	4.221	1.355	0.3582	0.00806
NR4A1	3.2e-05	8.514	7.162	1.352	0.319	0.002682
AFAP1L1	3.6e-05	4.116	2.764	1.351	0.3206	0.002825
NBL1	4e-06	5.261	3.914	1.347	0.2839	0.000623
LOC102724689	2e-05	5.669	4.365	1.304	0.2994	0.00195
SVOPL	0.000266	6.759	5.457	1.303	0.3518	0.009694
SPTBN1	<0,000001	10.46	9.157	1.301	0.1733	<0,000001
H1F0	4.7e-05	9.649	8.364	1.285	0.3099	0.003327
TCN1	1.7e-05	6.988	5.711	1.277	0.2903	0.001789
F2R	6e-06	8.288	7.036	1.252	0.271	0.000964
SMOX	8e-05	5.13	3.879	1.251	0.3116	0.004632
GATA2	<0,000001	9.163	7.92	1.243	0.2422	0.000182
C19orf33	4.1e-05	4.405	3.167	1.238	0.2961	0.00308
SERPINB9	1.7e-05	9.942	8.708	1.234	0.2813	0.001842
GADD45A	<0,000001	9.962	8.74	1.222	0.2044	7e-06
PBX4	1.8e-05	5.756	4.544	1.212	0.2771	0.001897
IL1RL1	<0,000001	7.515	6.311	1.204	0.166	<0,000001
FGD5	2.3e-05	5.431	4.264	1.167	0.2698	0.002077
MACROD2	0.000206	5.515	4.348	1.167	0.3095	0.008251
CSF1	<0,000001	8.021	6.858	1.163	0.1808	2e-06
TBXA2R	9e-06	6.771	5.611	1.159	0.2546	0.001156
GYPC	0.000241	10.5	9.364	1.133	0.3039	0.009086
MAFF	3.3e-05	11.78	10.66	1.126	0.2659	0.002689
GAB1	0.000102	6.56	5.445	1.115	0.2821	0.005371
PKN3	1e-05	6.41	5.299	1.111	0.2463	0.001325
NMT2	1e-06	6.07	4.965	1.104	0.2222	0.000327
MCTP2	0.000274	7.763	6.669	1.093	0.2959	0.009907
SPRY1	7e-06	8.193	7.113	1.08	0.2348	0.00099
CKB	<0,000001	7.223	6.146	1.077	0.1966	5.9e-05
FAM171A1	<0,000001	7.584	6.516	1.068	0.2057	0.000156
SLC2A3	1.8e-05	10.57	9.512	1.055	0.2411	0.001889
CDK15	1.3e-05	5.569	4.529	1.039	0.2336	0.001524
XIRP1	0.000139	6.286	5.25	1.036	0.2673	0.006473
LRRC8B	<0,000001	7.95	6.919	1.031	0.194	0.000115
SOCS3	0.000148	8.522	7.499	1.023	0.2654	0.006761
BAMBI	2.1e-05	6.75	5.729	1.021	0.2353	0.002004
MEIS2	3e-06	5.959	4.952	1.007	0.2087	0.000503
S1PR1	9e-05	6.456	5.45	1.006	0.2524	0.004886
HAS1	0.000238	4.354	3.364	0.9898	0.2652	0.009069
SLC44A2	0.000223	6.455	5.469	0.9863	0.2631	0.008679
GRK5	0.00018	6.531	5.557	0.9747	0.2561	0.00757
FSCN1	0.00019	8.103	7.135	0.9673	0.2551	0.007829
PRR9	1.4e-05	5.05	4.091	0.9597	0.2163	0.001578
CAV2	6.8e-05	6.058	5.099	0.9591	0.2365	0.004241
BCL6B	1.2e-05	6.083	5.133	0.9499	0.2121	0.00141
RHOB	0.000173	10.71	9.762	0.9496	0.2488	0.00742
NET1	<0,000001	9.376	8.455	0.9211	0.1578	1.4e-05
STAM	<0,000001	9.756	8.839	0.9164	0.1768	0.000156
ZNF529	4e-06	8.57	7.657	0.9129	0.1921	0.000603
DUSP2	0.000249	9.197	8.292	0.9042	0.2431	0.009219
CDK17	<0,000001	9.264	8.367	0.8964	0.1568	2e-05
IL6ST	5.2e-05	8.466	7.575	0.8905	0.2161	0.00353
LINC01181	0.00019	6.401	5.519	0.882	0.2326	0.007829
MTHFD2L	2.4e-05	8.214	7.333	0.8812	0.2043	0.002137
ADCYAP1	6.6e-05	2.515	1.634	0.8804	0.2167	0.004186
STXBP5	0.000177	7.98	7.101	0.8788	0.2307	0.007492
KCTD15	0.000266	3.395	2.519	0.8762	0.2367	0.009701
GBP4	0.000236	6.864	5.994	0.8707	0.2332	0.009021
RELB	5.3e-05	7.872	7.01	0.8619	0.2093	0.003559
RHOC	1.5e-05	8.145	7.293	0.8523	0.1925	0.001615
USP53	0.000216	6.725	5.885	0.8406	0.2237	0.0085
TPO	0.000254	3.119	2.286	0.8332	0.2243	0.009346
RAB33A	4.8e-05	7.039	6.219	0.8207	0.1982	0.003379
MARCKSL1	0.000203	9.835	9.025	0.8098	0.2146	0.008233
SSFA2	<0,000001	9.712	8.903	0.8094	0.1323	5e-06
CYTH3	0.000204	6.943	6.137	0.8059	0.2136	0.008251
GRB10	0.000226	7.933	7.13	0.8028	0.2143	0.008718
ZNF331	0.000165	8.35	7.556	0.7939	0.2073	0.007293
NAB2	0.000136	6.741	5.953	0.7879	0.2031	0.006418
CSRNP1	6.9e-05	10.41	9.658	0.7551	0.1863	0.004241
BACE2	9.1e-05	6.702	5.948	0.7539	0.1893	0.004935
PIM3	0.000132	10.7	9.953	0.7498	0.1929	0.0063
CSNK1E	1e-05	8.823	8.101	0.7225	0.1597	0.00127
RHBDD2	<0,000001	8.408	7.699	0.7092	0.1114	2e-06
ZNF451	0.000248	10.33	9.633	0.6994	0.1879	0.009219
FLT1	2.9e-05	7.91	7.214	0.6968	0.1633	0.002523
ENPP3	1.1e-05	6.847	6.16	0.6868	0.1529	0.001379
MATR3	1.9e-05	8.288	7.603	0.6854	0.1569	0.001919
RNF103	5.9e-05	9.43	8.748	0.6823	0.1668	0.003847
YOD1	0.00017	9.772	9.091	0.6804	0.1781	0.007407
TTC7B	5.8e-05	7.767	7.096	0.6715	0.164	0.003791
PSME4	<0,000001	9.582	8.919	0.663	0.1141	1.5e-05
CTNNBL1	<0,000001	8.624	7.963	0.661	0.1048	3e-06
DDA1	<0,000001	8.68	8.019	0.6604	0.1272	0.000156
ZNF440	0.00011	6.536	5.885	0.6516	0.1656	0.005575
AGO2	7.6e-05	8.034	7.391	0.643	0.1596	0.004462
ZFP1	0.000137	6.894	6.257	0.6379	0.1645	0.006426
ARL5B	7.3e-05	9.256	8.621	0.6351	0.1572	0.004375
PIK3CA	7.2e-05	8.27	7.636	0.6335	0.1568	0.004364
CSNK1D	5.1e-05	8.969	8.346	0.6229	0.151	0.003481
RBM3	7e-06	10.92	10.31	0.6154	0.1336	0.000979
SH2D2A	4.1e-05	6.729	6.115	0.6144	0.147	0.00308
CENPV	0.00019	8.451	7.838	0.6138	0.1619	0.007829
ZNF107	3.5e-05	7.328	6.722	0.6059	0.1436	0.002787
CNST	8.6e-05	9.064	8.46	0.6045	0.1512	0.00475
ATP2C1	4.3e-05	8.457	7.852	0.6044	0.1449	0.003136
AP1B1	3e-06	7.78	7.182	0.5978	0.1241	0.000509
P2RX1	4.6e-05	9.475	8.878	0.5968	0.1438	0.003311
ARIH2	7.5e-05	9.676	9.08	0.5962	0.1479	0.004462
HSF2	8.2e-05	8.121	7.527	0.5938	0.1481	0.004665
CCNG1	9.4e-05	10.96	10.38	0.577	0.1452	0.005069
SIAH1	4e-06	8.842	8.27	0.5724	0.1209	0.000636
PRKX	4.6e-05	7.353	6.783	0.5704	0.1373	0.003288
ZXDB	0.000128	7.425	6.87	0.5557	0.1427	0.00619
EPB41L4A-AS1	0.000239	10.75	10.2	0.5512	0.1478	0.009078
STAT5A	<0,000001	8.702	8.163	0.5387	0.08654	4e-06
PHF19	2e-06	8.35	7.813	0.5377	0.111	0.000469
LEPROTL1	1.1e-05	10.01	9.473	0.5356	0.1194	0.001382
KDM3A	0.000142	9.876	9.347	0.5296	0.1369	0.006561
LRRC8A	4.4e-05	9.475	8.948	0.5266	0.1265	0.003194
ZCCHC10	6.7e-05	8.396	7.886	0.5099	0.1256	0.004207
NFAT5	3.7e-05	9.008	8.5	0.5087	0.1209	0.002859
ZNF274	0.000115	8.621	8.112	0.5086	0.1297	0.005778
EIF1B	1.9e-05	11.78	11.27	0.5064	0.116	0.001919
PRKAB1	0.000131	7.629	7.123	0.5061	0.1301	0.006268
SNX5	2.1e-05	10.66	10.16	0.5043	0.1163	0.002004
PDK1	0.000198	9.436	8.937	0.4998	0.1322	0.00806
UAP1	0.00012	8.347	7.848	0.4996	0.1277	0.005904
CCNT2	1.8e-05	8.412	7.914	0.4974	0.1137	0.001897
CLN5	8e-05	8.233	7.738	0.4947	0.1232	0.004632
IMPA1	<0,000001	9.305	8.812	0.493	0.09407	0.000143
PAPOLA	2.9e-05	10.4	9.902	0.4929	0.1156	0.002541
TAB2	0.000249	8.514	8.021	0.4927	0.1324	0.009219
PIAS2	7e-05	7.615	7.129	0.4854	0.1199	0.004282
GRAMD1A	8.5e-05	8.12	7.637	0.4825	0.1206	0.004716
ZKSCAN8	6e-06	8.116	7.635	0.4812	0.1038	0.000921
VPS37B	0.000162	8.462	7.982	0.48	0.1252	0.007214
PDRG1	1.5e-05	8.186	7.708	0.4779	0.1079	0.001615
INO80C	0.000142	8.204	7.732	0.4719	0.122	0.006578
STK24	0.000139	10.78	10.31	0.4693	0.1211	0.006473
ATG14	0.000101	8.625	8.157	0.4679	0.1183	0.005371
ARPP19	0.000271	9.342	8.875	0.4676	0.1265	0.009839
MARCH6	0.000118	10.08	9.619	0.4591	0.1172	0.005877
RPL36	1.2e-05	13.03	12.57	0.4551	0.1018	0.001425
HERC1	8e-06	9.149	8.698	0.4508	0.09858	0.001095
ZNF496	8.3e-05	7.968	7.517	0.4504	0.1125	0.004708
MED17	0.000206	8.809	8.358	0.4504	0.1195	0.008251
UBA6	5.1e-05	8.937	8.491	0.4461	0.108	0.003455
DBF4	0.00012	8.786	8.341	0.4448	0.1137	0.005915
SREK1	0.000206	10.28	9.844	0.4404	0.1168	0.008251
JOSD1	6.7e-05	9.546	9.109	0.4366	0.1076	0.004212
DCTN6	4e-05	8.864	8.427	0.4365	0.1042	0.003037
CCDC94	0.000218	7.437	7.001	0.4365	0.1162	0.008559
ADRM1	2.2e-05	9.447	9.019	0.4281	0.09888	0.002063
USP16	6.3e-05	9.339	8.913	0.4251	0.1043	0.004043
STRN	1.2e-05	7.59	7.168	0.4222	0.09454	0.001432
SAP30BP	2.4e-05	8.576	8.154	0.4219	0.09785	0.002144
RAP2B	0.000145	10.09	9.675	0.4194	0.1086	0.006682
ZNF326	0.00021	8.788	8.37	0.4178	0.111	0.008382
PFDN4	0.000176	10.38	9.967	0.4174	0.1095	0.007465
HBS1L	3.8e-05	8.628	8.223	0.4056	0.09657	0.002921
CCNY	0.000185	9.366	8.963	0.4024	0.1059	0.007745
RBM27	0.000276	9.424	9.025	0.399	0.108	0.009959
ZBTB17	5e-06	7.796	7.398	0.3982	0.08519	0.0008
C18orf25	0.000175	8.356	7.966	0.3897	0.1022	0.007465
DLST	<0,000001	9.006	8.617	0.3896	0.07135	6.1e-05
NUP54	0.000114	9.866	9.477	0.389	0.09912	0.005737
C18orf8	1.2e-05	8.522	8.135	0.3863	0.08644	0.00143
PNO1	1.3e-05	8.301	7.918	0.3832	0.08604	0.001498
DIDO1	8.6e-05	7.556	7.174	0.3821	0.09559	0.004753
PRPF39	0.000195	7.642	7.261	0.3804	0.1005	0.007991
ZBTB5	2e-05	8.165	7.79	0.3753	0.08618	0.00195
HNRNPK	2e-05	12.01	11.64	0.3714	0.08539	0.001963
UFM1	6.6e-05	9.765	9.395	0.3704	0.09119	0.004186
ZNF317	0.000241	8.542	8.172	0.3699	0.09918	0.009086
YTHDC1	2.2e-05	10.13	9.762	0.367	0.0848	0.002063
PRDM10	0.000161	7.145	6.786	0.359	0.09357	0.00717
CSNK2A2	8.3e-05	9.125	8.767	0.3585	0.08953	0.004708
RAB2B	6.6e-05	8.537	8.187	0.3498	0.08608	0.004176
ATF4	6.7e-05	12.68	12.34	0.3452	0.08507	0.004212
ANKMY2	0.000171	8.64	8.298	0.342	0.08953	0.007407
GATAD2A	3.1e-05	9.44	9.099	0.3414	0.08037	0.002614
DCTN5	6.9e-05	7.911	7.572	0.3388	0.0836	0.004242
FAM91A1	0.000233	9.034	8.697	0.3368	0.09009	0.008938
LOC440434	1.7e-05	8.454	8.118	0.3364	0.07662	0.001824
EMD	5.5e-05	7.655	7.32	0.3351	0.08156	0.003655
BCL2L2	0.000168	7.486	7.161	0.3248	0.08492	0.007374
MAPK1IP1L	0.000106	11.12	10.8	0.3233	0.08197	0.005474
PSPC1	0.00018	8.69	8.382	0.308	0.08092	0.00757
CAND1	5.6e-05	8.733	8.427	0.3068	0.07475	0.003689
EIF3D	0.000137	11.43	11.13	0.3025	0.07803	0.006426
RBM17	2.3e-05	10.06	9.755	0.3007	0.06957	0.002077
MRPL54	0.000238	9.399	9.109	0.2897	0.07763	0.009069
NONO	8.2e-05	11.82	11.56	0.2653	0.06616	0.004665
CXXC1	3.3e-05	8.851	9.089	-0.2378	0.05616	0.002689
RER1	0.000124	8.18	8.471	-0.2908	0.07451	0.006057
LOC101929243	0.000203	6.978	7.301	-0.3229	0.08554	0.008228
TRIM41	1e-05	6.862	7.187	-0.3252	0.07202	0.001306
GRB2	0.000174	9.093	9.425	-0.3318	0.08695	0.00742
DUS2	0.000216	6.494	6.828	-0.3343	0.08894	0.0085
P4HTM	0.000126	7.508	7.851	-0.3427	0.08789	0.006132
MTO1	0.000147	7.415	7.773	-0.3581	0.0928	0.006733
TSPAN3	0.000215	8.75	9.11	-0.3599	0.09575	0.0085
ZNF106	4.7e-05	7.683	8.05	-0.3672	0.08855	0.003327
MANBA	0.000195	7.707	8.09	-0.3829	0.1012	0.007991
PARL	5.1e-05	8.338	8.722	-0.3839	0.09297	0.003457
TOR3A	3.9e-05	7.622	8.01	-0.3873	0.0924	0.002999
COASY	9.6e-05	7.702	8.095	-0.3932	0.09907	0.005156
HPS5	7.5e-05	6.116	6.511	-0.3952	0.09805	0.004462
KIAA2013	5.6e-05	7.977	8.373	-0.3961	0.09648	0.003689
ATR	0.000223	7.57	7.969	-0.3988	0.1063	0.00867
TCHP	4.6e-05	7.384	7.795	-0.411	0.09901	0.003311
MSL1	0.000245	8.685	9.098	-0.4122	0.1107	0.009151
ZBTB8OS	9.8e-05	7.745	8.159	-0.4147	0.1046	0.005245
RHOT1	9e-06	7.986	8.402	-0.4166	0.09171	0.001193
LRR1	3.4e-05	6.85	7.267	-0.4174	0.09875	0.002744
INTS10	1.8e-05	7.731	8.151	-0.4198	0.09592	0.001889
LSM10	8.8e-05	7.528	7.955	-0.4271	0.107	0.004799
NSL1	0.000208	7.854	8.281	-0.4272	0.1134	0.008329
LRRC8D	0.000249	7.698	8.126	-0.4276	0.1149	0.009219
CD99L2	0.000168	6.41	6.838	-0.4283	0.112	0.007374
MDH1	0.000233	9.309	9.74	-0.4305	0.1152	0.008938
ATG3	1.8e-05	10.05	10.48	-0.4322	0.09857	0.001844
BLOC1S1	0.000116	8.462	8.902	-0.4406	0.1124	0.005804
C5orf15	8.8e-05	8.297	8.739	-0.4415	0.1106	0.004799
TMEM19	2.1e-05	6.558	7.001	-0.4437	0.1022	0.001993
MPV17L2	0.000155	5.829	6.274	-0.4442	0.1155	0.007004
MIF4GD	2.3e-05	8.174	8.619	-0.4456	0.103	0.002077
HSBP1	4.1e-05	9.279	9.726	-0.4467	0.1069	0.00308
SCAMP1	<0,000001	8.04	8.494	-0.4532	0.08623	0.000136
SPOP	4.4e-05	8.179	8.64	-0.4613	0.1108	0.003186
SPAST	7.5e-05	7.219	7.684	-0.4646	0.1152	0.004461
GALNS	0.000276	6.879	7.345	-0.4658	0.1261	0.009959
MAN2B2	3.1e-05	7.155	7.622	-0.4665	0.1097	0.002589
ERLIN2	0.000107	6.691	7.158	-0.467	0.1185	0.005492
BICD2	2e-06	7.943	8.411	-0.4673	0.0959	0.000441
LIPT1	0.000104	6.364	6.832	-0.4678	0.1185	0.005408
NUP214	<0,000001	7.77	8.239	-0.4689	0.0931	0.00025
SRGN	0.000112	13.16	13.63	-0.4724	0.1202	0.005675
YWHAB	0.000239	10.04	10.52	-0.4738	0.127	0.009069
ANAPC13	7e-06	9.207	9.694	-0.4868	0.106	0.001011
TPP1	0.000241	10.39	10.88	-0.4954	0.1329	0.009088
SUMF1	7e-06	7.484	7.982	-0.498	0.108	0.000964
RNPEP	0.000277	8.115	8.616	-0.5008	0.1357	0.009993
PIGX	0.000221	6.477	6.979	-0.5016	0.1337	0.008648
LDOC1L	1.9e-05	7.174	7.677	-0.5026	0.1152	0.001937
ANP32A-IT1	0.000251	5.723	6.226	-0.5037	0.1355	0.00925
COQ2	0.000173	7.308	7.814	-0.506	0.1326	0.00742
TRMT12	0.000214	6.062	6.57	-0.5086	0.1353	0.008497
TMEM50B	<0,000001	7.395	7.908	-0.513	0.09618	0.000106
ATP23	2e-06	6.95	7.464	-0.5138	0.1044	0.000375
DSN1	0.000152	5.748	6.264	-0.5157	0.1339	0.00691
MPHOSPH6	2e-06	7.043	7.564	-0.5209	0.1075	0.000469
PIGU	0.000108	6.654	7.181	-0.5271	0.1338	0.00553
RRM1	7.8e-05	8.538	9.065	-0.5273	0.1311	0.004544
STAT2	6e-06	8.308	8.838	-0.5295	0.1148	0.000964
SNX20	0.000212	7.484	8.015	-0.5303	0.1409	0.008448
IVD	1.5e-05	6.586	7.122	-0.5358	0.1211	0.00162
PREB	0.000161	6.731	7.271	-0.5398	0.1407	0.007172
MINOS1	7e-05	9.436	9.979	-0.5428	0.1341	0.004282
RFC4	2e-05	7.716	8.266	-0.5502	0.1264	0.00195
MCM8	0.000103	6.199	6.753	-0.5542	0.1402	0.005372
AKR7A3	3.8e-05	6.42	6.975	-0.5551	0.1321	0.00292
CNPY3	8e-06	8.106	8.668	-0.5622	0.1231	0.001099
DPAGT1	0.000153	6.844	7.407	-0.5631	0.1463	0.006962
FRAT1	7.4e-05	7.215	7.781	-0.5665	0.1404	0.0044
ABR	0.000118	7.106	7.674	-0.5682	0.1451	0.005894
MRM2	0.000127	7.157	7.726	-0.5688	0.1459	0.006132
PPCS	<0,000001	7.258	7.83	-0.5719	0.1102	0.000156
LOC100505549	7.6e-05	5.988	6.57	-0.582	0.1445	0.004462
B3GALT4	0.000245	5.625	6.225	-0.5997	0.161	0.009151
RGS14	0.00016	6.607	7.213	-0.6065	0.158	0.007147
DDX11L2	0.000225	6.215	6.826	-0.6111	0.1631	0.008718
NAAA	6.8e-05	7.254	7.866	-0.612	0.151	0.004241
STAC3	0.000134	5.983	6.597	-0.6132	0.1579	0.006341
PCMT1	0.000186	8.013	8.629	-0.6156	0.1621	0.007755
MSRB2	0.000186	7.721	8.337	-0.616	0.1622	0.007759
MRPL33	0.000133	10.3	10.92	-0.6212	0.1599	0.006318
CCPG1	8e-05	6.197	6.818	-0.6215	0.1548	0.004632
SLC43A3	1e-05	7.624	8.247	-0.6234	0.1384	0.001336
PPT1	2e-06	10.13	10.75	-0.6239	0.1289	0.000473
PIK3AP1	0.000171	8.461	9.088	-0.6267	0.1641	0.007407
LAMP2	4e-06	9.622	10.25	-0.6271	0.1327	0.000648
COA3	0.000142	8.092	8.723	-0.6305	0.163	0.006561
KLHL7	0.000187	5.953	6.584	-0.6307	0.1662	0.007778
HEXIM2	4.9e-05	4.669	5.3	-0.6314	0.1527	0.003416
ATP6V1D	5.4e-05	6.855	7.491	-0.6356	0.1545	0.00361
QDPR	3e-05	7.439	8.075	-0.6361	0.1494	0.002561
DGCR2	2.1e-05	6.542	7.179	-0.6369	0.1466	0.001974
METTL7A	0.000176	9.385	10.03	-0.6403	0.168	0.007465
LCP1	0.000127	9.918	10.56	-0.6422	0.1648	0.006152
CPT2	0.000231	5.68	6.322	-0.6422	0.1717	0.008905
FAM120A	<0,000001	9.832	10.48	-0.6438	0.1151	3.6e-05
C5orf34	0.000187	4.323	4.968	-0.6445	0.1698	0.007767
UMAD1	2.5e-05	5.614	6.26	-0.6464	0.1504	0.002266
TMEM205	2e-06	7.352	8	-0.6479	0.1323	0.000405
TMEM129	9e-06	5.371	6.019	-0.6488	0.1428	0.001193
NEK4	<0,000001	6.37	7.018	-0.6489	0.1255	0.000161
ALG6	4.1e-05	6.78	7.43	-0.6501	0.1554	0.00308
TDRD7	0.000165	6.27	6.925	-0.6551	0.1711	0.007298
CREBL2	1.2e-05	6.166	6.827	-0.6607	0.1478	0.001425
HEATR3	8.4e-05	6.163	6.827	-0.6637	0.1658	0.004708
PARVG	8.3e-05	8.138	8.802	-0.6638	0.1657	0.004693
NUDT22	0.000247	6.427	7.093	-0.6655	0.1788	0.009199
MX2	2e-05	6.602	7.271	-0.6692	0.1536	0.001945
CTSC	0.000164	8.948	9.622	-0.6735	0.1758	0.007275
LAIR1	3.7e-05	8.294	8.968	-0.6741	0.1603	0.00289
DCP1B	5.6e-05	5.845	6.52	-0.6753	0.1646	0.003689
PSRC1	0.000102	5.231	5.906	-0.6753	0.1708	0.005371
PDE6D	2.9e-05	6.86	7.544	-0.6848	0.1604	0.002518
CPD	<0,000001	7.37	8.057	-0.687	0.1365	0.000252
EFCAB7	0.000166	4.656	5.343	-0.6872	0.1795	0.007318
LY75	0.000121	7.807	8.498	-0.6908	0.1767	0.005925
ZNF133	<0,000001	5.355	6.048	-0.6938	0.1363	0.000208
ITGAL	7.1e-05	7.425	8.12	-0.695	0.1719	0.004323
TMEM254	2e-06	5.26	5.956	-0.6959	0.142	0.000405
ATP6V0E1	8e-06	9.953	10.65	-0.6975	0.1527	0.001099
IKZF1	2e-06	8.264	8.969	-0.7056	0.1429	0.000365
SH3KBP1	<0,000001	9.115	9.821	-0.7059	0.1338	0.00013
GLRX	2e-05	8.437	9.143	-0.7062	0.1624	0.001963
KIAA1715	2e-06	6.176	6.89	-0.7142	0.1474	0.000469
BRCC3	3.3e-05	6.451	7.171	-0.7199	0.17	0.002689
CAPRIN2	0.000174	6.011	6.734	-0.7238	0.1897	0.00742
SNTB1	<0,000001	6.726	7.451	-0.7248	0.1378	0.000135
NXT2	2e-06	8.472	9.2	-0.728	0.1497	0.000448
SQRDL	4.7e-05	7.993	8.721	-0.7287	0.1756	0.003314
PNP	1.7e-05	8.332	9.062	-0.7304	0.1661	0.001789
CTSA	0.00025	9.437	10.17	-0.7324	0.1969	0.00924
POP5	1.7e-05	7.941	8.675	-0.7335	0.1671	0.001824
DNAJA3	1.3e-05	6.716	7.454	-0.7382	0.166	0.001524
PLOD1	<0,000001	6.398	7.142	-0.7442	0.1422	0.000145
SCO2	0.000104	7.202	7.948	-0.7458	0.1889	0.005408
C6orf203	1e-05	5.62	6.37	-0.7504	0.1658	0.001263
ATPAF1	4.1e-05	6.591	7.343	-0.7513	0.1798	0.00308
RPS6KA1	4e-06	7.028	7.78	-0.7516	0.1586	0.000627
TIMP2	0.000104	7.964	8.716	-0.7516	0.1904	0.005408
P2RY8	8.6e-05	8.486	9.238	-0.7521	0.1882	0.004753
AGTRAP	7.6e-05	7.24	7.994	-0.7541	0.1872	0.004462
AK2	5.7e-05	8.521	9.278	-0.7575	0.1848	0.003729
LOC441081	2e-05	5.626	6.386	-0.7599	0.1743	0.001945
AIM1	0.000126	7.383	8.146	-0.7626	0.1956	0.006132
SLC35A1	5.6e-05	7.512	8.275	-0.7628	0.1859	0.003689
ERLIN1	<0,000001	8.682	9.446	-0.7642	0.1495	0.000199
APAF1	3.6e-05	6.168	6.937	-0.7687	0.1824	0.002825
RACGAP1	0.000245	6.86	7.631	-0.7717	0.2072	0.009151
PAK1	7e-06	6.612	7.384	-0.7719	0.1674	0.000964
SLC29A3	0.000199	5.392	6.165	-0.7729	0.2045	0.008099
ILDR2	0.000119	4.794	5.57	-0.7758	0.1983	0.005904
ANLN	3e-05	5.757	6.535	-0.7782	0.1827	0.002561
SLC36A4	8e-06	6.23	7.02	-0.7897	0.1731	0.001113
MEGF9	0.000271	5.909	6.704	-0.795	0.215	0.009844
TMED10	<0,000001	8.894	9.692	-0.7976	0.1548	0.000174
GOLGA8N	0.000156	10.75	11.55	-0.8023	0.2087	0.007015
SLC22A16	6.4e-05	7.077	7.881	-0.804	0.1975	0.004081
UBXN2B	1.5e-05	6.438	7.242	-0.8044	0.1819	0.001622
PURA	8.4e-05	6.834	7.644	-0.8094	0.2023	0.004716
GLT8D1	<0,000001	6.908	7.723	-0.815	0.1492	6.1e-05
GNS	5e-05	7.913	8.73	-0.8168	0.1976	0.003431
PTAFR	4.4e-05	7.42	8.241	-0.8209	0.1971	0.003186
PSMB8-AS1	6e-06	7.033	7.856	-0.8228	0.178	0.000952
C14orf119	0.00019	6.512	7.336	-0.8232	0.2171	0.007829
HEXB	4e-06	8.523	9.348	-0.8251	0.1747	0.000648
AKR7A2	5e-05	8.268	9.094	-0.8261	0.1999	0.003431
IDH1	4.2e-05	7.236	8.063	-0.8273	0.1982	0.003108
ECHDC1	3.5e-05	7.586	8.43	-0.8441	0.1999	0.002767
IL10RB	<0,000001	7.468	8.315	-0.8478	0.1463	1.5e-05
DAPP1	<0,000001	7.843	8.696	-0.8533	0.1409	5e-06
CEP63	2e-06	6.272	7.126	-0.8538	0.1754	0.000441
RAB27A	<0,000001	7.812	8.672	-0.8595	0.1659	0.000156
NSF	1.1e-05	6.45	7.31	-0.8599	0.191	0.001344
PREPL	1.2e-05	5.579	6.44	-0.861	0.1921	0.001386
TSEN2	0.000174	4.989	5.856	-0.8665	0.2271	0.00742
EAF2	<0,000001	8.603	9.472	-0.8695	0.1408	4e-06
CBX1	1.1e-05	7.255	8.128	-0.873	0.1947	0.001386
SLC1A4	9e-06	6.602	7.479	-0.8773	0.1937	0.001254
PIWIL4	2.8e-05	6.949	7.827	-0.8782	0.2056	0.002493
CDCA3	0.000176	5.484	6.365	-0.8807	0.2311	0.007465
OPN3	2.6e-05	6.826	7.707	-0.8809	0.2053	0.00232
PGM1	<0,000001	7.095	7.976	-0.881	0.1695	0.000156
INPP4A	3e-06	6.465	7.355	-0.8902	0.187	0.000583
MBP	3.2e-05	5.958	6.851	-0.8925	0.2106	0.002682
CAT	7e-06	10.65	11.54	-0.8962	0.1955	0.001043
PAQR4	1.5e-05	5.449	6.347	-0.898	0.2029	0.001615
HSD17B4	<0,000001	7.777	8.676	-0.8982	0.1719	0.000148
NUCB2	<0,000001	9.779	10.68	-0.9006	0.1776	0.000217
FGD2	0.000205	7.731	8.636	-0.9043	0.2397	0.008251
ATL3	6e-06	7.137	8.042	-0.9047	0.1956	0.000945
RBKS	4.7e-05	5.641	6.55	-0.9092	0.2193	0.003329
WDHD1	0.000215	3.813	4.729	-0.9164	0.2438	0.0085
PILRA	0.000136	6.248	7.167	-0.9191	0.237	0.006425
GLIPR2	6e-06	7.48	8.4	-0.9196	0.1978	0.000877
PRKCD	0.000126	6.516	7.437	-0.9203	0.236	0.006126
CARD16	1e-05	7.219	8.142	-0.9231	0.2049	0.001336
C12orf49	2.1e-05	5.431	6.36	-0.9295	0.2143	0.002004
C11orf21	0.00013	7.188	8.128	-0.9398	0.2415	0.006228
TRADD	2.3e-05	6.271	7.212	-0.9407	0.2176	0.002077
WDR4	0.000145	5.188	6.132	-0.944	0.2444	0.006682
C10orf54	0.000265	7.863	8.817	-0.9536	0.2575	0.009694
KIAA0930	2e-06	7.837	8.792	-0.955	0.1959	0.000441
LOC100507642	8.2e-05	4.64	5.601	-0.9609	0.2396	0.004665
SMARCD3	0.000119	4.363	5.327	-0.9639	0.2463	0.005904
CD300LF	0.000139	6.815	7.798	-0.9825	0.2536	0.006473
ARL11	0.000261	4.36	5.345	-0.9856	0.2658	0.009572
MFSD1	<0,000001	9.532	10.52	-0.9878	0.1588	4e-06
TMEM187	9.3e-05	3.903	4.891	-0.9883	0.2486	0.005048
SLC36A1	4e-06	5.042	6.033	-0.9908	0.209	0.000623
BRI3BP	3.6e-05	6.666	7.658	-0.9922	0.2357	0.002859
ATP10D	0.000156	4.933	5.928	-0.9944	0.2587	0.007015
ADCY7	7.8e-05	6.963	7.959	-0.9958	0.2476	0.004547
EMB	3e-06	9.094	10.09	-0.9959	0.208	0.00054
PIGM	4.2e-05	5.418	6.415	-0.997	0.2387	0.003096
CD300A	0.000206	6.691	7.69	-0.9999	0.2651	0.008251
HTATIP2	0.00013	7.036	8.039	-1.003	0.2577	0.006228
ALDH2	0.000113	7.152	8.16	-1.008	0.2565	0.005698
IRF8	6.5e-05	7.916	8.925	-1.009	0.2481	0.004116
PPP1R27	3e-06	6.176	7.187	-1.012	0.212	0.00057
HPS3	<0,000001	6.461	7.479	-1.018	0.1951	0.000152
NAIP	3e-06	5.711	6.729	-1.018	0.2119	0.00053
TFEC	0.000214	6.697	7.72	-1.022	0.2718	0.008486
RASGEF1A	0.000171	4.456	5.488	-1.033	0.2704	0.007407
ACPP	3.6e-05	5.222	6.258	-1.036	0.2458	0.002834
AKT3	1.1e-05	4.118	5.162	-1.044	0.2322	0.001352
GAPT	4.1e-05	6.239	7.283	-1.044	0.2499	0.00308
ASRGL1	4.8e-05	5.929	6.98	-1.051	0.2536	0.00335
METTL7B	0.0001	5.619	6.67	-1.051	0.2654	0.005298
HCK	3.4e-05	6.789	7.853	-1.065	0.2522	0.002767
BRCA1	8.7e-05	5.049	6.118	-1.069	0.2677	0.004753
SV2B	0.000222	3.019	4.093	-1.074	0.2863	0.008648
SYK	<0,000001	7.654	8.731	-1.078	0.1578	<0,000001
ADRB2	3e-06	5.633	6.711	-1.078	0.2247	0.000532
PLXNC1	0.000136	6.124	7.206	-1.081	0.2787	0.006415
ATF6B	0.000102	4.717	5.8	-1.083	0.2741	0.005371
SHQ1	3e-05	5.006	6.098	-1.092	0.2566	0.002561
CCR1	0.000107	5.512	6.605	-1.093	0.2773	0.00552
LYZ	9.9e-05	12.08	13.18	-1.094	0.2762	0.005295
SIRPA	<0,000001	5.988	7.086	-1.098	0.2133	0.000174
TTC1	0.000188	5.56	6.659	-1.098	0.2894	0.007788
C17orf62	1.4e-05	6.312	7.411	-1.099	0.2476	0.001576
ITGB2	1.9e-05	9.11	10.22	-1.107	0.2535	0.001919
SIRPB2	4.9e-05	5.275	6.384	-1.109	0.268	0.003411
GRN	3e-06	8.91	10.02	-1.112	0.232	0.00054
AOAH	2.1e-05	5.565	6.695	-1.13	0.26	0.001974
POC1A	<0,000001	4.445	5.584	-1.139	0.2161	0.00013
GPT2	0.000146	4.385	5.525	-1.14	0.2952	0.006682
DHRS7B	7e-05	3.82	4.965	-1.145	0.2829	0.004282
PTPN22	<0,000001	5.677	6.827	-1.149	0.1885	5e-06
CBR1	0.000232	3.664	4.814	-1.15	0.3076	0.008905
CASP1	<0,000001	8.068	9.221	-1.153	0.1996	1.6e-05
TOP1MT	0.000243	6.5	7.655	-1.155	0.3099	0.009126
IL6R	4e-06	6.764	7.929	-1.165	0.2467	0.000648
DEXI	3.2e-05	5.662	6.827	-1.166	0.2749	0.002681
PLXDC2	3e-06	5.021	6.19	-1.169	0.2441	0.00054
ALOX5AP	0.000184	7.792	8.98	-1.188	0.3127	0.007722
DPEP2	5.1e-05	5.657	6.853	-1.196	0.2899	0.003471
TFEB	7.7e-05	4.929	6.125	-1.196	0.2973	0.004523
GINS1	1.2e-05	5.165	6.369	-1.204	0.2692	0.001425
NUDT7	1.1e-05	5.086	6.299	-1.213	0.2702	0.001382
SELPLG	4.4e-05	6.737	7.95	-1.213	0.2913	0.003186
CLEC12A	7.1e-05	6.7	7.93	-1.229	0.3039	0.004319
CD180	0.000168	4.822	6.053	-1.232	0.3221	0.007374
C1orf54	6.1e-05	6.27	7.516	-1.245	0.305	0.003932
GAS2L3	1.9e-05	3.892	5.146	-1.254	0.2872	0.001919
OLIG1	0.000171	5.825	7.079	-1.254	0.3282	0.007407
FLT3	2.4e-05	8.085	9.34	-1.255	0.2914	0.002166
SNX10	<0,000001	6.856	8.112	-1.256	0.2149	1.4e-05
ACTN1	<0,000001	8.506	9.766	-1.26	0.2174	1.5e-05
SMCO4	8.4e-05	5.21	6.479	-1.268	0.3169	0.004708
CECR1	0.00024	7.04	8.311	-1.27	0.3406	0.009086
IL17RA	<0,000001	7.304	8.585	-1.281	0.2384	8.9e-05
SKIDA1	0.000252	3.679	4.963	-1.284	0.3454	0.009276
SH2D3C	3e-06	5.297	6.583	-1.286	0.268	0.000532
MS4A7	8.2e-05	6.565	7.857	-1.292	0.3224	0.00468
IL10RB-AS1	9.2e-05	2.582	3.876	-1.294	0.3251	0.004961
CMTM4	<0,000001	4.794	6.1	-1.306	0.2577	0.00022
FUT7	7.3e-05	3.398	4.711	-1.313	0.3252	0.004396
CAPG	3.8e-05	7.544	8.863	-1.318	0.3138	0.00292
SEL1L3	1.1e-05	5.7	7.025	-1.325	0.2943	0.001344
RECK	1.9e-05	4.056	5.397	-1.341	0.3075	0.001945
SPATS2L	0.000146	4.856	6.203	-1.346	0.3487	0.006688
ALCAM	<0,000001	7.302	8.654	-1.352	0.2181	4e-06
LAT2	2e-06	7.996	9.352	-1.355	0.2792	0.000461
LY86	3e-06	8.177	9.536	-1.359	0.2851	0.000574
BAHCC1	8.6e-05	4.745	6.115	-1.369	0.3426	0.004753
DMXL2	2e-06	6.953	8.344	-1.392	0.2857	0.000441
SELL	6e-06	8.862	10.27	-1.411	0.3037	0.000879
SLC22A15	1e-06	4.806	6.221	-1.415	0.2852	0.000333
LRP11	3e-05	3.306	4.766	-1.46	0.343	0.002561
SLITRK4	0.000113	3.845	5.311	-1.466	0.3733	0.005703
ADARB1	3e-06	4.061	5.53	-1.469	0.3079	0.00057
RHOU	2e-05	4.804	6.276	-1.472	0.3383	0.001953
SPNS3	8e-06	5.244	6.726	-1.481	0.3242	0.001099
B3GNTL1	1.4e-05	4.717	6.207	-1.49	0.336	0.001579
MVB12B	<0,000001	4.749	6.245	-1.496	0.2449	5e-06
TNFSF13	<0,000001	6.896	8.401	-1.505	0.2733	5.3e-05
HOXA7	6.1e-05	4.927	6.45	-1.523	0.3728	0.003932
SHTN1	0.00016	3.599	5.139	-1.54	0.4013	0.007147
C1orf162	<0,000001	6.914	8.463	-1.549	0.2574	6e-06
RBM47	5.4e-05	4.934	6.483	-1.549	0.3763	0.003589
MPP7	7e-06	3.636	5.198	-1.563	0.3389	0.000964
RASSF4	0.000111	5.414	6.979	-1.564	0.3978	0.005615
FCN1	0.000106	6.183	7.757	-1.574	0.3991	0.005474
JAML	1.2e-05	4.155	5.746	-1.591	0.3549	0.001386
GBAP1	<0,000001	4.345	5.946	-1.601	0.3141	0.000207
NCF2	2.9e-05	6.027	7.636	-1.609	0.3773	0.002533
MS4A6A	0.000265	6.455	8.074	-1.618	0.4369	0.009687
HOXA3	0.00022	4.179	5.804	-1.626	0.4331	0.008613
PLA2G16	3e-05	3.267	4.924	-1.657	0.389	0.002557
FAM20C	9.9e-05	2.611	4.27	-1.658	0.4187	0.005295
SAMHD1	<0,000001	7.795	9.455	-1.661	0.3063	7.2e-05
TMEM170B	<0,000001	4.404	6.073	-1.669	0.2732	5e-06
KCTD12	6.4e-05	5.334	7.036	-1.702	0.4181	0.004105
PBX3	2e-06	6.225	7.93	-1.705	0.3457	0.000366
TLR4	<0,000001	4.141	5.874	-1.733	0.3268	0.000117
MSRB1	3e-06	5.074	6.807	-1.733	0.3602	0.000516
FGL2	3.9e-05	5.381	7.12	-1.739	0.4144	0.002959
AZU1	0.00023	8.184	10.02	-1.839	0.4916	0.008869
RNASE3	3e-06	6.987	8.834	-1.847	0.3829	0.000503
TNFSF13B	<0,000001	7.736	9.65	-1.914	0.2971	2e-06
MPEG1	1.1e-05	6.255	8.178	-1.924	0.4286	0.001382
HOXA5	0.000109	5.106	7.218	-2.112	0.5365	0.005548
HNMT	6e-06	3.703	5.817	-2.114	0.4581	0.000964
ECRP	<0,000001	5.426	7.548	-2.122	0.3802	3.7e-05
RNASE2	<0,000001	8.917	11.05	-2.129	0.3787	3.1e-05
CTSG	1e-06	6.869	9.026	-2.157	0.4351	0.000334
MSRB3	6e-06	5.959	8.162	-2.203	0.4741	0.000879
SPINK2	7e-05	6.516	8.777	-2.261	0.5587	0.004282
CSTA	<0,000001	8.553	10.83	-2.274	0.3576	2e-06
RNASE6	<0,000001	5.018	7.331	-2.313	0.4602	0.000255
CPVL	<0,000001	4.686	7.136	-2.45	0.3818	2e-06
HOXA10	2e-06	4.26	6.906	-2.647	0.5434	0.000441
