# Supplementary material for: Two Receptors, Two Isoforms, Two Cancers: Comprehensive Analysis of KIT and TrkA Expression in Neuroblastoma and Acute Myeloid Leukemia
Source: Front Oncol. 2019 Oct 18;9:1046. doi: 10.3389/fonc.2019.01046 (PMC6813278; doi:10.3389/fonc.2019.01046)
Supplement: Supplementary Table 5 — List of differentially expressed genes in NB groups with KIT high/low and NTRK1 high/low expression. [file Table_5.XLSX]

## Sheet: NB KIT
data set	Versteeg NB
Gene Name	P value	Mean of KIT high	Mean of KIT low	Difference	SE of difference	FDR q value
NOS1	<0,000001	4.186	1.478	2.708	0.4849	0.000457
LINC00839	2e-05	6.296	3.611	2.685	0.5947	0.004605
CCNYL2	2.1e-05	6.203	3.652	2.551	0.5658	0.004605
NMU	4e-06	5.516	3.011	2.505	0.5095	0.001788
GAL	2e-06	9.834	7.488	2.346	0.4627	0.001404
PTPN5	3e-05	5.703	3.495	2.208	0.5008	0.005575
BEND4	1.1e-05	6.358	4.151	2.207	0.4731	0.003345
CRABP1	5.3e-05	5.355	3.183	2.171	0.5105	0.007859
DUSP4	1e-05	6.44	4.271	2.168	0.4619	0.003111
SUSD5	<0,000001	4.113	2.033	2.08	0.3858	0.000691
GABRA5	2e-06	3.917	1.858	2.059	0.3999	0.001118
RET	6.8e-05	6.294	4.281	2.013	0.4808	0.009413
LRRN1	9e-06	5.313	3.31	2.003	0.4235	0.00284
ABCA12	3.7e-05	4.245	2.384	1.862	0.4278	0.006148
HAPLN4	1.4e-05	4.553	2.729	1.824	0.3957	0.003725
SLC30A3	2e-06	4.256	2.447	1.809	0.3546	0.001308
TMEM100	4e-06	6.393	4.618	1.775	0.359	0.001738
JPH1	6e-06	5.947	4.178	1.769	0.3675	0.002377
CITED1	3e-06	5.137	3.392	1.745	0.3514	0.001641
TMEM158	2.9e-05	4.786	3.076	1.709	0.3871	0.005533
GLDC	1.7e-05	4.947	3.277	1.67	0.3664	0.004224
MIR99AHG	<0,000001	6.257	4.608	1.649	0.2911	0.000391
FAM19A5	2.2e-05	6.73	5.132	1.598	0.3564	0.004705
SIX2	5.8e-05	4.765	3.257	1.509	0.3568	0.00837
ADAMTS17	<0,000001	5.14	3.634	1.506	0.2731	0.000562
PENK	3.9e-05	5.4	3.896	1.503	0.3465	0.006308
CHODL	3.6e-05	6.239	4.758	1.481	0.3398	0.006088
FAM43B	2e-05	4.232	2.782	1.45	0.3216	0.004605
SLC32A1	3.4e-05	3.527	2.09	1.437	0.3286	0.006039
NCR3LG1	3.5e-05	6.476	5.047	1.429	0.3273	0.006088
DLL3	1.8e-05	6.142	4.754	1.388	0.3059	0.004412
TRIM71	3e-06	5.163	3.812	1.351	0.2717	0.001641
CA12	7e-06	4.892	3.56	1.332	0.2787	0.002519
VAX2	5.1e-05	5.242	4.001	1.241	0.2909	0.007595
PDE8B	3e-06	6.237	5.09	1.147	0.2282	0.001489
GRIP2	1.8e-05	4.738	3.605	1.133	0.2499	0.004412
ATP10D	<0,000001	8.221	7.103	1.118	0.1847	0.000146
HS3ST2	4.7e-05	5.711	4.605	1.106	0.2579	0.007199
PRR34-AS1	4e-06	6.839	5.746	1.093	0.2222	0.001788
PHGDH	1.8e-05	6.909	5.824	1.085	0.2387	0.004412
NOX4	8e-06	6.012	4.996	1.016	0.2135	0.002636
NT5DC3	5e-05	5.639	4.626	1.013	0.2373	0.00753
OXCT2	5.8e-05	4.244	3.301	0.9425	0.2228	0.00837
BEGAIN	4e-06	6.385	5.53	0.8553	0.1735	0.001763
CD3EAP	6.1e-05	5.965	5.17	0.7954	0.1885	0.008633
INTU	3e-06	6.486	5.706	0.7795	0.1547	0.001459
KIF9	7e-05	7.415	6.652	0.7629	0.1826	0.009512
NFIB	5.6e-05	10.13	9.382	0.7521	0.1773	0.008072
PUS7	3.6e-05	8.011	7.286	0.7252	0.1665	0.006106
PNKP	2.2e-05	6.371	5.708	0.6635	0.1476	0.004605
TMEM231	<0,000001	6.525	5.874	0.651	0.1216	0.000728
SSSCA1	2.1e-05	6.085	5.446	0.6394	0.1422	0.004605
PRMT3	3.8e-05	6.938	6.306	0.6329	0.1456	0.006199
ZNF581	3.7e-05	7.31	6.725	0.5855	0.1346	0.006148
DDX10	2.1e-05	7.77	7.188	0.5821	0.1294	0.004605
METTL1	2.7e-05	6.23	5.686	0.5435	0.1224	0.005292
CLNS1A	2.7e-05	9.364	8.822	0.5421	0.1221	0.005292
DPY19L3	3e-05	8.338	7.803	0.5354	0.1214	0.005575
SLC25A38	<0,000001	7.12	6.595	0.5255	0.09918	0.000792
NR2C2AP	4e-06	6.551	6.045	0.5059	0.1031	0.001795
GAR1	1.3e-05	7.604	7.104	0.5	0.1082	0.003689
WDR12	7.1e-05	8.407	7.913	0.4945	0.1185	0.009574
PFKM	7e-06	9.371	8.882	0.489	0.1024	0.002519
JAM3	1e-06	8.571	8.096	0.4744	0.09022	0.000803
KDELC2	7.1e-05	6.878	6.41	0.468	0.112	0.009512
ZNF667	1.1e-05	7.778	7.327	0.4506	0.09633	0.003225
ZNF26	3.1e-05	7.449	7.004	0.445	0.1011	0.005614
KXD1	3.6e-05	7.818	7.384	0.4339	0.0995	0.006088
LTA4H	9e-06	9.511	9.084	0.4271	0.09024	0.00284
MTX3	2.1e-05	7.984	7.563	0.4209	0.0936	0.004605
HIF1A	2e-06	10.89	10.47	0.4169	0.08224	0.001404
CDK2AP1	5.5e-05	10.93	10.53	0.4032	0.09493	0.007996
SLC25A3	1.4e-05	11.5	11.12	0.3745	0.0812	0.003725
FBXW9	4.7e-05	6.109	5.743	0.3661	0.0854	0.007199
NEU3	1.5e-05	6.632	6.301	0.3307	0.07206	0.003903
HIGD2A	6.9e-05	9.342	9.051	0.2906	0.06944	0.009413
ARGLU1	4e-05	10.57	10.93	-0.3622	0.08367	0.006402
SENP7	6.3e-05	7.57	7.942	-0.3714	0.08827	0.00891
HECTD2	3e-06	8.531	9.015	-0.4842	0.09753	0.001641
C15orf41	4.7e-05	7.109	7.593	-0.4846	0.1131	0.007199
KIF5C	3.1e-05	11.11	11.59	-0.4871	0.1108	0.005687
SGPL1	7e-06	8.477	8.972	-0.4956	0.1036	0.002519
RAPGEF6	5e-05	10.44	10.95	-0.5194	0.1216	0.00753
BRICD5	9e-06	5.627	6.157	-0.5297	0.1123	0.00292
DDX5	2.2e-05	9.153	9.698	-0.5453	0.1213	0.004605
PTH1R	2.5e-05	5.184	5.747	-0.5626	0.1261	0.005027
NEURL1	2.6e-05	4.973	5.555	-0.5824	0.1309	0.005194
LINC00476	1e-06	6.122	6.706	-0.5841	0.1124	0.000949
TMOD2	2.3e-05	9.114	9.719	-0.6051	0.1353	0.004851
ATP8A1	1.3e-05	9.133	9.744	-0.6113	0.1321	0.003655
TMEM178B	3e-05	8.341	8.957	-0.616	0.1398	0.005575
RAB6B	2.7e-05	8.516	9.15	-0.634	0.143	0.005403
CYTH1	<0,000001	8.514	9.152	-0.6383	0.1174	0.0006
BEND5	5e-06	7.631	8.27	-0.639	0.1316	0.002117
RHOU	1.9e-05	9.173	9.814	-0.6407	0.1416	0.004566
ELAVL4	1e-06	10.87	11.51	-0.6411	0.1222	0.000803
AGPS	<0,000001	7.835	8.481	-0.6465	0.1183	0.000566
DTNA	1.6e-05	7.643	8.294	-0.6507	0.142	0.003959
DOCK4	2e-06	9.429	10.09	-0.6638	0.1315	0.001445
GNAI1	<0,000001	9.067	9.741	-0.6747	0.1268	0.000792
ARHGEF10L	1.2e-05	7.083	7.774	-0.6914	0.149	0.003544
APBA2	5e-06	8.589	9.281	-0.6923	0.1428	0.002117
HID1	6.4e-05	6.186	6.885	-0.6986	0.1662	0.008989
STMN4	1.9e-05	10.18	10.89	-0.7102	0.1566	0.004412
LRRN3	3.5e-05	10.06	10.8	-0.7441	0.1705	0.006088
LOC100128288	<0,000001	6.275	7.022	-0.7465	0.1393	0.000728
LCOR	<0,000001	8.816	9.593	-0.777	0.1173	5.9e-05
PLCL1	3e-06	6.553	7.358	-0.8048	0.1605	0.001524
RNF165	1.4e-05	8.663	9.476	-0.813	0.1764	0.003725
FAM69A	4e-05	7.73	8.597	-0.8664	0.2	0.006372
EPHB3	4.3e-05	5.506	6.374	-0.8674	0.2012	0.006734
ATP6V1G2	6.9e-05	7.845	8.713	-0.8676	0.2074	0.009413
DLC1	3.5e-05	8.815	9.69	-0.8753	0.2004	0.006088
SLCO3A1	4.5e-05	7.088	7.987	-0.899	0.209	0.006913
RND3	1.4e-05	9.372	10.27	-0.9014	0.1959	0.003765
NRCAM	3e-06	9.338	10.25	-0.915	0.183	0.001572
SCN9A	7.4e-05	6.984	7.914	-0.9302	0.2234	0.009836
GPR85	7e-06	7.76	8.706	-0.9458	0.1969	0.002407
RUNDC3B	2.2e-05	8.816	9.796	-0.9805	0.2183	0.004605
MAOA	<0,000001	10.59	11.57	-0.9815	0.1853	0.000792
PAG1	1.2e-05	8.326	9.35	-1.024	0.2205	0.003544
CROT	<0,000001	8.011	9.068	-1.057	0.1844	0.000325
EBF1	7e-06	9.657	10.73	-1.069	0.2225	0.002407
SEC31B	2.8e-05	4.646	5.733	-1.086	0.2454	0.005453
ALCAM	1e-06	10.2	11.28	-1.089	0.2075	0.000803
ZFPM2	3.2e-05	6.996	8.157	-1.161	0.2646	0.00583
HECW1	6.9e-05	5.322	6.489	-1.167	0.2788	0.009413
ZNF804A	<0,000001	8.747	9.953	-1.206	0.1936	0.000123
RBFOX1	3.4e-05	6.898	8.134	-1.236	0.2824	0.005998
DSEL	9e-06	6.878	8.137	-1.259	0.267	0.00292
CORO2A	1e-06	6.424	7.732	-1.308	0.249	0.000803
PRKCB	4.1e-05	7.074	8.386	-1.312	0.3031	0.006412
CACNA2D3	1.2e-05	8.044	9.371	-1.327	0.286	0.003544
CD44	<0,000001	9.785	11.16	-1.372	0.236	0.000259
CNTN1	1.6e-05	8.573	9.985	-1.411	0.3082	0.003959
OSBPL3	1.1e-05	6.471	7.97	-1.499	0.3202	0.003225
LOC283516	5e-06	4.312	5.945	-1.633	0.3368	0.002117
ITGA8	4e-05	5.726	7.363	-1.637	0.3779	0.006372
CNTNAP2	<0,000001	8.203	9.866	-1.664	0.3034	0.000562
KHDC1L	1e-06	2.106	3.826	-1.72	0.327	0.000803
TMEM255A	2e-06	7.648	9.412	-1.764	0.3488	0.001433
ZDHHC18	2.9e-05	3.377	5.145	-1.768	0.4003	0.005533
ANKFN1	4e-06	5.092	6.9	-1.808	0.3661	0.001738
CDH22	3e-06	3.128	4.983	-1.855	0.3716	0.001584
XKR4	2.9e-05	4.747	6.701	-1.954	0.4426	0.005533
SLC18A2	8e-06	6.719	8.783	-2.064	0.4335	0.002626
KCND2	<0,000001	5.721	7.792	-2.071	0.3334	0.000123
CASZ1	<0,000001	4.111	6.189	-2.078	0.3681	0.000391
TRIM55	<0,000001	3.255	5.337	-2.082	0.3542	0.000225
ADRB2	<0,000001	4.742	6.86	-2.118	0.3471	0.000146
IL7	<0,000001	6.755	8.946	-2.192	0.3985	0.000562
CCBE1	<0,000001	4.874	7.377	-2.503	0.4195	0.00018
NTRK1	4e-06	5.126	7.882	-2.756	0.5619	0.001795
KRT19	2e-05	5.604	8.42	-2.816	0.6237	0.004605

## Sheet: NB NTRK1
data set	Versteeg NB
Gene Name	P value	Mean of NTRK1 high	Mean of NTRK1 low	Difference	SE of difference	FDR q value
AMIGO2	<0,000001	9.693	7.145	2.548	0.4786	0.000433
RORB	<0,000001	7.863	5.316	2.546	0.4305	0.00011
SOX6	<0,000001	8.475	6.135	2.34	0.3683	3.2e-05
CCBE1	4e-06	8.341	6.031	2.309	0.4693	0.001238
CREG2	1e-06	6.455	4.195	2.26	0.4304	0.000519
ECEL1	0.000138	7.71	5.56	2.15	0.5387	0.00728
VWDE	1.4e-05	7.865	5.793	2.072	0.4495	0.002167
PIRT	4.2e-05	9.484	7.412	2.072	0.4801	0.003711
ADRB2	5e-06	7.643	5.733	1.911	0.3916	0.001322
FAXDC2	2e-05	6.981	5.095	1.886	0.4178	0.002511
NPFF	1e-06	6.86	5.019	1.841	0.3541	0.000561
CDH22	1.7e-05	5.792	3.954	1.837	0.4034	0.002385
C1QTNF2	0.000184	6.607	4.796	1.811	0.4632	0.008311
CHD5	<0,000001	7.638	5.867	1.771	0.3258	0.000349
ITGA8	3.6e-05	8.176	6.423	1.754	0.402	0.003381
GCGR	6e-05	6.363	4.617	1.747	0.4137	0.00439
CACNG3	4.6e-05	4.476	2.773	1.703	0.3966	0.00382
HMX1	1e-06	7.806	6.138	1.668	0.3196	0.000561
ACHE	0.000195	6.143	4.509	1.634	0.4197	0.008687
PLXNA4	2e-06	8.012	6.39	1.622	0.3213	0.000828
TMEM255A	8.6e-05	10.07	8.472	1.594	0.3867	0.005571
ANKFN1	0.000183	7.539	5.947	1.592	0.4071	0.008311
HRK	3.2e-05	8.086	6.502	1.585	0.3611	0.003266
MDGA1	1.6e-05	5.443	3.9	1.543	0.3379	0.002296
TMEFF2	0.000123	10.08	8.549	1.533	0.381	0.00677
INSRR	6.6e-05	4.69	3.162	1.529	0.3644	0.004677
CNTNAP2	2.8e-05	10.48	8.981	1.501	0.3387	0.00298
OSBPL3	4e-05	8.635	7.135	1.5	0.3461	0.003571
SYT2	0.000106	6.35	4.884	1.466	0.3607	0.006109
CAMK2B	<0,000001	8.801	7.344	1.457	0.2265	3.2e-05
AMPH	8.4e-05	7.978	6.534	1.444	0.3496	0.005443
RAB3B	2.6e-05	8.194	6.796	1.398	0.3142	0.002866
PLAGL1	1.6e-05	9.065	7.676	1.389	0.3035	0.002254
ADCY1	<0,000001	10.07	8.68	1.387	0.2508	0.000273
PLCD4	2.2e-05	7.228	5.864	1.364	0.3039	0.002655
PDE11A	1e-05	6.388	5.047	1.341	0.2856	0.001797
PCDH7	9e-06	9.647	8.309	1.337	0.2831	0.001703
SYT13	4.1e-05	10.52	9.182	1.337	0.3091	0.003613
TLN2	1e-06	8.332	6.997	1.335	0.2566	0.000561
LOC100996246	9.7e-05	4.053	2.72	1.334	0.3261	0.005832
MAP7	2e-06	9.695	8.365	1.33	0.2631	0.000817
PGM2L1	<0,000001	10.31	9.002	1.306	0.2434	0.000426
RGS7	<0,000001	9.742	8.459	1.283	0.2223	0.00015
VSTM2A	5.8e-05	10.71	9.43	1.282	0.303	0.004323
PRKCB	0.000207	8.939	7.665	1.274	0.3287	0.008954
APBA1	<0,000001	8.111	6.843	1.268	0.2186	0.000144
LOC101928307	0.00016	9.879	8.622	1.257	0.3183	0.007734
ZFPM2	3.4e-05	8.725	7.492	1.233	0.282	0.003331
AK5	1.9e-05	6.532	5.307	1.225	0.2706	0.002511
FAM69A	<0,000001	9.245	8.026	1.218	0.1949	3.4e-05
CHST1	7e-06	8.898	7.692	1.207	0.252	0.001572
EPB41L4A	<0,000001	8.152	6.951	1.201	0.2176	0.000273
C2CD4B	3.5e-05	3	1.804	1.196	0.2738	0.003366
RAB3C	7e-06	9.952	8.758	1.194	0.2493	0.001572
RBFOX1	0.000213	8.645	7.458	1.187	0.307	0.009082
KCNQ3	0.000226	7.802	6.62	1.182	0.3069	0.009359
SLC22A4	<0,000001	6.22	5.048	1.173	0.1948	8.4e-05
FBXO30	2.7e-05	9.284	8.128	1.156	0.2606	0.002929
ABLIM3	6e-06	7.7	6.551	1.149	0.2382	0.001561
PRUNE2	4.5e-05	9.938	8.818	1.119	0.2605	0.00382
DAB1	0.000222	6.412	5.298	1.114	0.289	0.009298
ZNF365	0.00015	7.061	5.985	1.077	0.2714	0.007543
NXPH1	1.9e-05	10.51	9.448	1.065	0.235	0.002511
NRCAM	<0,000001	10.76	9.71	1.049	0.1904	0.000276
PMP22	4.5e-05	11.68	10.63	1.047	0.2438	0.00382
SLCO3A1	8e-06	8.489	7.452	1.037	0.2184	0.001654
RFPL1S	0.000103	7.691	6.656	1.035	0.2542	0.006048
STK31	0.000179	5.211	4.205	1.006	0.2568	0.00817
CPNE2	<0,000001	9.499	8.503	0.9968	0.1708	0.000133
DLC1	9e-06	10.17	9.173	0.9934	0.2102	0.001703
PLXNC1	1e-06	10.21	9.214	0.991	0.1885	0.000519
GALNT16	<0,000001	8.88	7.904	0.9769	0.1742	0.000239
EBF1	0.000168	11.12	10.16	0.9669	0.2457	0.007957
ATP6V1G2	3.1e-05	9.169	8.206	0.9636	0.2189	0.003186
EPB41L1	1.1e-05	8.908	7.944	0.9633	0.2057	0.001844
SCG2	0.000225	11.45	10.49	0.9535	0.2475	0.009344
ATP2B4	3.1e-05	8.683	7.737	0.9455	0.2151	0.003219
FAIM2	1e-06	8.691	7.754	0.9371	0.1799	0.000561
SCN3B	<0,000001	9.661	8.732	0.9289	0.1612	0.00015
ALDOC	0.000107	7.429	6.503	0.9258	0.2279	0.006131
LOC101928100	0.000222	5.839	4.93	0.9088	0.2357	0.009298
ASTN2	0.000144	7.168	6.261	0.9067	0.2279	0.00736
PSD2	3.4e-05	8.124	7.218	0.9058	0.2072	0.003331
LIFR	0.000161	9.321	8.419	0.9025	0.2287	0.00776
PRKCZ	8e-06	8.598	7.696	0.9014	0.1897	0.001654
SCN2A	0.000124	9.282	8.389	0.8934	0.2222	0.006786
KIF1B	<0,000001	9.708	8.815	0.8927	0.1674	0.000433
GABARAPL1	0.000202	7.898	7.012	0.8863	0.2283	0.008849
RGMB	1.2e-05	10.88	9.997	0.8861	0.1904	0.001965
SGSM1	5e-06	8.292	7.407	0.8851	0.1824	0.001431
SLC4A8	9e-06	9.322	8.441	0.8811	0.1867	0.001703
RAPGEF5	3.6e-05	9.03	8.152	0.8779	0.2014	0.003383
LSMEM1	0.000163	6.243	5.371	0.8721	0.2211	0.007787
CTNND2	5.2e-05	8.07	7.2	0.8699	0.2042	0.004097
CADM3	<0,000001	6.114	5.253	0.8604	0.1614	0.000433
FAM134B	7.2e-05	9.447	8.592	0.855	0.205	0.004881
GPR85	0.000179	9.055	8.203	0.8524	0.2176	0.00817
REEP1	2.5e-05	10.22	9.366	0.8497	0.1907	0.002859
ANO6	7e-06	10.24	9.398	0.8385	0.1754	0.001576
MAP1LC3A	1.2e-05	8.709	7.873	0.8365	0.1798	0.001965
EPB41L4A-AS2	6.8e-05	5.306	4.469	0.8364	0.1997	0.004765
PYGB	1.6e-05	8.248	7.413	0.835	0.1827	0.002278
HMP19	0.000196	10.58	9.743	0.8349	0.2146	0.008718
LOC439938	0.000155	5.766	4.941	0.8251	0.2084	0.007564
MCF2L	1.5e-05	8.953	8.131	0.822	0.179	0.00222
LONRF2	5e-06	9.932	9.117	0.8155	0.1677	0.001387
SRCIN1	5.9e-05	7.58	6.769	0.8113	0.192	0.004356
C1orf204	<0,000001	6.257	5.45	0.8074	0.1505	0.000426
PEAR1	0.000121	6.999	6.194	0.805	0.1999	0.006695
RAB15	8e-06	8.127	7.325	0.8022	0.1687	0.001654
NECTIN1	<0,000001	7.376	6.578	0.7982	0.1134	5e-06
NDRG4	1.4e-05	9.752	8.954	0.798	0.1732	0.002167
ATP6V0E2-AS1	6e-05	6.418	5.621	0.7969	0.1887	0.00439
STMN4	8e-06	11.26	10.47	0.7849	0.1652	0.001654
GABBR1	<0,000001	8.998	8.216	0.7823	0.1467	0.000433
STXBP5L	0.000227	6.637	5.856	0.7817	0.2031	0.009381
ARHGAP26	0.000212	8.093	7.315	0.7781	0.2011	0.00905
TRIO	1.9e-05	9.271	8.495	0.776	0.1716	0.002511
KIFAP3	<0,000001	9.954	9.182	0.7719	0.1229	3.4e-05
SESN3	3.5e-05	10.02	9.25	0.7717	0.1768	0.003371
STXBP5	8.6e-05	8.235	7.467	0.7674	0.1862	0.005571
AKAP6	<0,000001	7.623	6.857	0.766	0.1452	0.000519
MAPT	4.8e-05	9.685	8.919	0.7653	0.1786	0.003892
CPEB3	0.000144	7.672	6.91	0.7616	0.1914	0.007362
SULT4A1	<0,000001	8.55	7.789	0.7608	0.1355	0.000239
VAMP2	<0,000001	8.738	7.978	0.7605	0.1362	0.000245
CNST	2.6e-05	8.372	7.615	0.7571	0.1703	0.002866
AHI1	0.000237	9.879	9.123	0.7563	0.1971	0.009594
MTURN	2e-05	9.957	9.203	0.7535	0.1671	0.002515
ADGRB2	0.000123	7.805	7.055	0.7508	0.1867	0.006775
SEPT8	8e-06	8.689	7.94	0.7489	0.1578	0.001654
ARHGEF10L	9e-06	8.121	7.375	0.7462	0.1581	0.001703
ICA1L	0.000235	8.944	8.206	0.7384	0.1924	0.009594
ARHGAP21	<0,000001	10.27	9.53	0.7365	0.1136	3.2e-05
CPEB4	0.000107	9.799	9.07	0.729	0.1794	0.006131
RIMS1	1.4e-05	7.398	6.674	0.7245	0.1573	0.002167
TOM1L2	3e-06	7.516	6.793	0.7237	0.1458	0.001103
SLC8A1	2.1e-05	8.647	7.927	0.7202	0.1598	0.002515
CAPN5	6.2e-05	6.029	5.31	0.7194	0.1707	0.004479
THRA	3.3e-05	8.084	7.367	0.7169	0.1637	0.003288
CCDC88A	1.5e-05	10.14	9.422	0.7159	0.1562	0.00225
NRSN1	3.9e-05	9.352	8.638	0.7141	0.1647	0.003571
ADRBK2	7.1e-05	10.83	10.12	0.7132	0.1708	0.004845
TMEM178B	5e-06	9.302	8.59	0.7119	0.1459	0.001322
PLCL1	0.00014	7.644	6.933	0.7117	0.1785	0.007284
ANKS1A	1.3e-05	9.687	8.98	0.7078	0.1528	0.002066
STX12	3.3e-05	9.747	9.042	0.7044	0.1607	0.003288
ATP8A1	2e-06	10.08	9.381	0.703	0.1378	0.000703
KIFC2	7e-05	7.689	6.989	0.7001	0.1675	0.004845
NCAM1	1.2e-05	11.19	10.49	0.699	0.1505	0.00199
ATAT1	0.000186	9.38	8.683	0.697	0.1784	0.008383
ULK2	1e-06	8.866	8.169	0.6967	0.1323	0.000519
HID1	0.000206	7.192	6.497	0.695	0.1793	0.008954
RAB5B	<0,000001	8.628	7.936	0.6923	0.1228	0.000239
DNAJC6	3.6e-05	10.48	9.791	0.6895	0.1581	0.003381
LOC283588	0.000159	6.786	6.097	0.6892	0.1745	0.007721
ZHX2	8.8e-05	7.828	7.139	0.6891	0.1674	0.005571
SPTAN1	1e-05	10.22	9.539	0.6851	0.1456	0.001759
HECW2	2e-05	7.339	6.657	0.6817	0.1508	0.002511
OTUD7A	6.3e-05	6.497	5.819	0.6777	0.161	0.004479
ZFYVE27	<0,000001	7.846	7.17	0.676	0.09642	5e-06
MTSS1	1e-05	10.6	9.934	0.6688	0.1421	0.001759
APBA2	4.6e-05	9.57	8.902	0.6686	0.1557	0.00382
DIXDC1	6.3e-05	8.936	8.268	0.6683	0.1588	0.004479
DNAJB2	<0,000001	7.536	6.869	0.6672	0.122	0.000313
PRKACB	5.3e-05	11.83	11.16	0.6664	0.1566	0.004142
AGPAT4	4.6e-05	8.156	7.493	0.6628	0.1544	0.00382
MAP7D1	4.9e-05	8.734	8.071	0.6628	0.1549	0.003943
VANGL2	3.1e-05	8.726	8.065	0.6607	0.1501	0.003186
KIF3C	1.1e-05	9.178	8.526	0.6524	0.1398	0.001903
SLC29A4	2e-05	7.632	6.981	0.6504	0.1439	0.002511
C20orf194	<0,000001	9.244	8.595	0.6489	0.1106	0.000125
RAB6B	6.2e-05	9.441	8.794	0.6476	0.1537	0.004479
GDPD5	1.4e-05	7.26	6.614	0.6459	0.1403	0.002167
GNAI1	1.4e-05	10.02	9.374	0.6431	0.1394	0.002167
TPT1-AS1	0.000142	7.396	6.754	0.6422	0.1612	0.007316
CADM1	0.000132	11.54	10.9	0.6391	0.1597	0.007083
SCN3A	0.000164	10.94	10.3	0.6384	0.1619	0.007817
DENND5B	1e-05	9.354	8.719	0.6347	0.1353	0.001797
DPYSL3	2e-06	11.22	10.59	0.6339	0.1239	0.000703
S100PBP	3e-06	9.179	8.546	0.6328	0.1274	0.001103
TMEM169	4.3e-05	7.621	6.989	0.6321	0.1465	0.003711
FAM102B	0.000142	9.122	8.491	0.631	0.1584	0.007316
LOC157562	0.000205	7.184	6.553	0.6307	0.1626	0.008953
SRGAP3	0.000142	8.249	7.619	0.6299	0.1581	0.007316
CCSER2	1.1e-05	9.44	8.813	0.6269	0.1345	0.001921
NCBP3	4e-06	8.633	8.007	0.6266	0.1272	0.001227
DOCK4	4.2e-05	10.36	9.733	0.6239	0.1446	0.003711
ATXN1	0.000118	9.327	8.703	0.6239	0.1546	0.006569
APOLD1	8.9e-05	8.119	7.495	0.6238	0.1516	0.005571
GLTSCR1L	0.000103	8.254	7.634	0.6204	0.1524	0.006048
CASD1	3.1e-05	9.903	9.289	0.6146	0.1397	0.003206
LOC100128288	0.000208	7.252	6.639	0.6126	0.1581	0.008954
ANKFY1	2.5e-05	9.202	8.59	0.6122	0.1374	0.002859
CTNNBIP1	7.4e-05	7.718	7.107	0.611	0.1467	0.004939
FBXO31	<0,000001	7.697	7.086	0.6105	0.109	0.000239
NECAP1	1e-06	9.029	8.419	0.6102	0.1178	0.000569
FBXL17	6e-06	8.06	7.452	0.608	0.1262	0.001561
FAM131B	1.9e-05	7.443	6.843	0.5993	0.1323	0.002511
DST	3e-06	10.97	10.37	0.5984	0.1187	0.000832
INPP1	0.000186	9.19	8.593	0.5976	0.153	0.008383
KIAA0930	0.000113	9.001	8.404	0.597	0.1475	0.006358
MYO5A	2e-05	9.408	8.815	0.5926	0.1311	0.002511
MIEF2	0.000121	6.072	5.484	0.5887	0.1461	0.006691
CYTH1	2e-05	9.398	8.809	0.5883	0.1303	0.002511
ZNF641	5.7e-05	8.866	8.278	0.5877	0.1388	0.004272
LRRC37B	1.8e-05	9.005	8.418	0.5876	0.1295	0.002488
KCNC4	9.9e-05	6.014	5.428	0.5867	0.1436	0.00588
CACNB3	4e-06	8.552	7.965	0.5864	0.1194	0.001243
BICD1	0.000147	9.26	8.675	0.5847	0.1471	0.007462
LOC100507431	5.3e-05	6.516	5.934	0.5824	0.1369	0.004142
ARHGEF9	7.1e-05	7.58	6.998	0.5819	0.1394	0.004845
BAZ2B	9e-06	9.243	8.662	0.5812	0.1231	0.001703
HIVEP2	2.5e-05	8.142	7.562	0.5799	0.1302	0.002866
PAFAH1B1	2e-06	10.9	10.32	0.5754	0.1128	0.000703
AMN1	0.000174	8.024	7.45	0.5737	0.1462	0.008063
SYT1	5.6e-05	10.48	9.905	0.5735	0.1353	0.004256
TMEM151B	9.3e-05	8.558	7.986	0.5723	0.1395	0.005758
WHSC1	0.000137	8.825	8.254	0.5715	0.1432	0.00727
FAXC	2.9e-05	8.664	8.093	0.5711	0.1292	0.003058
CAMK2G	1e-06	9.054	8.484	0.5705	0.1097	0.000561
SYNGR1	0.000153	8.389	7.819	0.5702	0.1439	0.007558
SLC2A11	2.3e-05	6.526	5.958	0.5682	0.127	0.002765
LOC153682	0.000172	6.937	6.37	0.5675	0.1445	0.008058
JUN	4.3e-05	10.02	9.457	0.5656	0.1312	0.003726
ENO2	0.000154	10.18	9.61	0.5655	0.1428	0.007558
ZCCHC17	0.000125	8.497	7.932	0.565	0.1406	0.006798
GPR153	0.000127	7.572	7.007	0.5648	0.1407	0.006884
AGPAT4-IT1	8.1e-05	7.046	6.482	0.5644	0.1364	0.005331
PDE4DIP	0.00014	8.345	7.781	0.564	0.1415	0.007284
LZTS3	0.000155	8.65	8.086	0.564	0.1425	0.007564
KLC1	0.000151	10.06	9.499	0.5636	0.1421	0.007549
FMN2	1.3e-05	7.666	7.102	0.5635	0.122	0.002138
RABGAP1L	0.000137	9.52	8.958	0.5624	0.1408	0.007263
PJA2	1.8e-05	10.25	9.691	0.5573	0.1228	0.002488
PBX1	<0,000001	9.581	9.025	0.5565	0.1043	0.000433
RABEP1	8.7e-05	9.751	9.198	0.5527	0.1342	0.005571
KIF5C	8e-06	11.86	11.31	0.5514	0.1163	0.001654
PPP2R5B	0.000127	7.128	6.576	0.5511	0.1373	0.006884
FAM174B	0.00017	6.431	5.883	0.5486	0.1395	0.008001
PINK1	0.000174	8.048	7.502	0.5454	0.1389	0.008063
MAP2K4	0.000169	9.009	8.464	0.5447	0.1384	0.007968
RAPGEF6	7.1e-05	11.2	10.66	0.5432	0.1301	0.004845
DCUN1D2	0.000177	7.567	7.024	0.5423	0.1383	0.008157
YWHAH	9.6e-05	9.736	9.2	0.5359	0.1309	0.005794
SNAP91	2.6e-05	9.986	9.451	0.5349	0.1203	0.002866
MADD	8.7e-05	8.037	7.504	0.5327	0.1293	0.005571
PNMA2	0.000239	10.66	10.13	0.5306	0.1383	0.009614
VPS26B	7e-06	8.01	7.48	0.5304	0.1112	0.001603
ZNF251	0.000211	7.287	6.758	0.5294	0.1368	0.009038
LOC286052	0.000211	8.167	7.638	0.529	0.1367	0.009038
ZBTB4	9.3e-05	9.218	8.689	0.5289	0.129	0.005758
UBE2H	9.5e-05	9.269	8.743	0.5265	0.1286	0.005794
GLS	3e-05	9.478	8.952	0.5258	0.1193	0.003165
ATPAF2	5.8e-05	6.594	6.07	0.5241	0.1239	0.004322
ARHGEF11	5.6e-05	7.368	6.847	0.522	0.1231	0.004229
KIAA1211	2.4e-05	9.45	8.93	0.5196	0.1162	0.002776
REEP5	0.000246	10.31	9.794	0.5195	0.1358	0.009826
ARRB1	4.7e-05	8.07	7.552	0.5178	0.1207	0.003846
PITPNA	0.000149	8.396	7.884	0.5127	0.1291	0.007494
MARK1	6e-06	8.224	7.712	0.5121	0.1062	0.001561
RUSC1	9.1e-05	8.531	8.02	0.5109	0.1244	0.005668
SYT11	1.8e-05	10.55	10.04	0.5103	0.1122	0.002432
MTMR9	4.6e-05	8.661	8.151	0.51	0.1187	0.00382
C15orf41	6e-05	7.827	7.317	0.5095	0.1208	0.004414
ACVR1B	7e-06	9.441	8.933	0.5084	0.106	0.001572
MAP3K12	0.000105	7.035	6.527	0.5081	0.1249	0.006109
ARL8A	3.8e-05	8.124	7.622	0.5025	0.1156	0.003503
WDR47	7.1e-05	9.122	8.622	0.5	0.1198	0.004845
CALCOCO1	0.000224	7.965	7.465	0.5	0.1298	0.009332
STRIP1	<0,000001	8.013	7.515	0.4984	0.07972	3.4e-05
TSPAN5	0.000174	8.506	8.008	0.4984	0.127	0.008063
PI4KA	0.00022	9.199	8.703	0.4957	0.1285	0.009272
GPD2	2.9e-05	8.316	7.82	0.4954	0.1122	0.003091
SH3GLB1	1.6e-05	10.19	9.696	0.4932	0.1078	0.002254
SGPL1	3.2e-05	9.19	8.697	0.4929	0.1122	0.003236
NKAIN1	4e-06	7.879	7.386	0.4924	0.1002	0.001243
RGS3	0.000197	8.273	7.783	0.4905	0.1261	0.008718
TULP4	0.000172	9.035	8.545	0.4904	0.1248	0.008037
KIF3A	0.000127	9.688	9.198	0.4902	0.1222	0.006884
NAGK	5e-05	9.326	8.836	0.4901	0.1148	0.003997
PPP1R21	1.1e-05	9.217	8.73	0.487	0.1041	0.001846
C5orf42	5.5e-05	5.946	5.466	0.4797	0.113	0.004197
KSR1	0.000167	8.281	7.802	0.4789	0.1217	0.007944
KCTD1	5.2e-05	8.399	7.923	0.4759	0.1117	0.004097
TMEM198B	0.000201	6.614	6.139	0.4753	0.1224	0.008829
SRRM3	6.8e-05	6.927	6.452	0.4749	0.1135	0.00477
NDEL1	7e-06	8.236	7.761	0.4745	0.09875	0.001572
ATP6V1B2	6.8e-05	10.24	9.772	0.4722	0.1128	0.004765
UNKL	2.4e-05	8.001	7.538	0.4631	0.1037	0.002814
HECA	2.7e-05	9.039	8.579	0.4592	0.1034	0.002917
ATP6V1C1	0.000121	8.881	8.426	0.4548	0.1129	0.006696
FAM184A	5.5e-05	8.028	7.574	0.4541	0.1069	0.004197
CSRNP2	2.5e-05	8.867	8.414	0.4539	0.1018	0.002847
FYN	1.2e-05	10.78	10.32	0.452	0.09721	0.001965
CYFIP2	3.3e-05	10.26	9.808	0.4513	0.103	0.003288
GAB2	7.9e-05	8.449	7.998	0.451	0.1088	0.005231
INPP5K	4e-06	7.181	6.73	0.4508	0.09108	0.001138
LPCAT4	4.9e-05	7.326	6.88	0.4451	0.1041	0.003972
ERC1	0.000101	7.927	7.487	0.4395	0.1078	0.006001
ZFAND3	0.000237	8.783	8.346	0.437	0.1139	0.009594
SERINC1	4e-06	11.47	11.04	0.4307	0.08791	0.001289
MXD1	2.6e-05	8.163	7.736	0.4271	0.09604	0.002866
FRS3	4.5e-05	6.874	6.448	0.4255	0.09892	0.003817
BRAF	0.000144	8.615	8.191	0.4238	0.1065	0.00736
AKIRIN2	3.3e-05	8.363	7.941	0.4224	0.09646	0.003288
AKT3	0.000229	9.978	9.563	0.415	0.1079	0.009425
MGAT4B	9.6e-05	8.956	8.542	0.4132	0.101	0.005794
PPP3CB	0.000155	10.11	9.698	0.4117	0.104	0.007564
ING4	0.000198	7.889	7.478	0.4102	0.1055	0.008723
PTPRA	<0,000001	8.47	8.061	0.4095	0.07418	0.000273
MAP1LC3B	0.000148	9.734	9.326	0.4083	0.1028	0.007486
BACE1	0.000189	8.065	7.657	0.4079	0.1045	0.008463
KIDINS220	0.000234	10.83	10.43	0.3984	0.1037	0.009584
KBTBD6	0.000169	9.057	8.66	0.3971	0.101	0.007968
TBC1D9	0.000193	9.607	9.21	0.3971	0.1019	0.008643
MOAP1	3.7e-05	10.13	9.742	0.3916	0.08993	0.003413
ENTPD4	5e-05	10.12	9.731	0.391	0.09157	0.003997
USP35	0.000153	6.322	5.932	0.3897	0.09836	0.007558
SENP7	8.8e-05	8.119	7.731	0.3885	0.09435	0.005571
COL4A3BP	9.6e-05	8.831	8.445	0.386	0.09431	0.005794
TTC19	0.000149	9.733	9.351	0.3817	0.09616	0.007494
ZDHHC17	9.8e-05	10.24	9.866	0.3776	0.09238	0.005857
CCDC115	0.000242	8.457	8.086	0.3703	0.09668	0.009724
PXK	0.00022	7.662	7.293	0.3698	0.09585	0.009272
LMBR1L	0.000224	7.498	7.131	0.3669	0.09522	0.009332
SNX27	0.000108	7.761	7.395	0.3657	0.0901	0.006156
CCDC149	9.4e-05	6.207	5.842	0.3646	0.08899	0.005794
AKAP11	6.9e-05	9.896	9.54	0.3558	0.08505	0.004787
MAPK1	0.000135	10.1	9.747	0.3545	0.08868	0.007169
RNF146	8.8e-05	9.793	9.443	0.3496	0.08495	0.005571
SAP30L	4.4e-05	8.951	8.605	0.3454	0.08022	0.00379
ACTR1B	0.000179	8.55	8.227	0.3229	0.08243	0.00817
CNOT8	0.000183	8.789	8.475	0.3143	0.08037	0.008311
FAM53C	6.5e-05	8.424	8.131	0.2933	0.06986	0.004641
SEPT2	9.3e-05	10.84	11.13	-0.28	0.0683	0.005758
MYDGF	0.000235	7.834	8.152	-0.3179	0.0828	0.009594
ARF4	0.000232	10.39	10.71	-0.3194	0.0831	0.009551
TWF2	0.000211	5.796	6.116	-0.3204	0.08278	0.009038
GTPBP10	0.000219	6.834	7.161	-0.3268	0.08467	0.009238
SERP1	0.000115	8.212	8.58	-0.368	0.09105	0.006484
KCMF1	4e-05	8.49	8.859	-0.3695	0.0853	0.003571
NUP37	0.000208	7.502	7.88	-0.3776	0.09746	0.008954
RYK	0.000124	7.587	7.966	-0.3794	0.09436	0.006786
HIF1A	6.2e-05	10.31	10.69	-0.3828	0.09089	0.004479
CLP1	0.00016	6.987	7.371	-0.3844	0.09736	0.007734
SPATA5L1	9.6e-05	7.297	7.686	-0.3887	0.09497	0.005794
G2E3	0.000104	7.499	7.893	-0.3942	0.09684	0.006064
NKAP	0.000148	6.189	6.583	-0.3945	0.09932	0.007486
MRPL16	2.8e-05	7.448	7.843	-0.395	0.08919	0.00298
NANP	5.5e-05	6.631	7.026	-0.3954	0.09314	0.004197
ZNF14	0.000132	6.883	7.288	-0.4045	0.1011	0.007083
MTERF1	0.000189	6.322	6.727	-0.4048	0.1037	0.008463
TMEM216	0.000134	6.583	6.991	-0.408	0.102	0.007155
MRPS12	0.000239	6.683	7.094	-0.4115	0.1073	0.009614
HEATR6	0.000156	6.776	7.198	-0.4215	0.1065	0.007604
TMEM251	7.5e-05	7.88	8.302	-0.422	0.1015	0.005015
ICT1	0.000107	7.756	8.182	-0.4262	0.1049	0.006132
MTFR1	1.9e-05	6.758	7.187	-0.4288	0.09475	0.002511
PIGA	0.00013	6.358	6.788	-0.4304	0.1074	0.006989
MRPS22	1.4e-05	8.044	8.478	-0.4344	0.09443	0.002181
TMEM101	0.000249	6.473	6.915	-0.4417	0.1155	0.009911
MRPL52	0.00015	6.79	7.238	-0.4481	0.113	0.007543
NR2C2AP	0.000173	5.863	6.312	-0.4494	0.1144	0.008063
KXD1	5.2e-05	7.177	7.63	-0.4533	0.1064	0.004097
MCCC1	7e-06	7.462	7.916	-0.4542	0.09479	0.001572
C11orf31	1.5e-05	10.15	10.61	-0.4548	0.09923	0.00225
MRPL4	0.000215	6.205	6.661	-0.4557	0.1179	0.009114
PRDX6	5.5e-05	9.092	9.551	-0.4593	0.1081	0.004197
PXYLP1	8.9e-05	8.643	9.105	-0.4622	0.1123	0.005571
YIPF6	2e-06	8.239	8.702	-0.4627	0.09048	0.000703
EIF1AX	7e-05	9.498	9.965	-0.4671	0.1118	0.004845
TMX1	2e-05	8.973	9.443	-0.4701	0.1042	0.002511
PHF14	0.000203	8.759	9.23	-0.4712	0.1214	0.00886
ING2	2e-05	6.157	6.631	-0.4735	0.1048	0.002511
TIGD2	3.4e-05	6.025	6.501	-0.4756	0.1087	0.003323
KBTBD8	0.000237	5.955	6.431	-0.4761	0.1241	0.009594
ETFA	8.9e-05	8.669	9.148	-0.479	0.1164	0.005571
UBA5	1e-06	7.026	7.506	-0.4796	0.0919	0.000561
MBD4	3.2e-05	8.341	8.821	-0.4798	0.1093	0.003266
GLA	0.000177	6.582	7.062	-0.4804	0.1225	0.008157
DCBLD2	4.4e-05	7.199	7.685	-0.4853	0.1128	0.003815
TMEM41A	<0,000001	5.923	6.411	-0.4879	0.08808	0.000273
ZNF621	7.3e-05	6.229	6.718	-0.4895	0.1175	0.004914
TIPIN	0.000199	5.967	6.461	-0.494	0.1271	0.008775
SHQ1	2e-06	6.968	7.466	-0.4979	0.09847	0.000817
ZNF511	8e-05	6.915	7.42	-0.505	0.1219	0.005248
SSR4	4e-05	9.808	10.31	-0.5051	0.1166	0.003571
SLC25A5	4.2e-05	10.16	10.67	-0.5071	0.1174	0.003688
MRPL11	4.9e-05	6.872	7.383	-0.5107	0.1195	0.003983
ZNF443	1.2e-05	7.066	7.584	-0.5181	0.1117	0.002018
EME1	0.000134	6.861	7.38	-0.5193	0.1298	0.007142
TOMM5	0.000195	9.411	9.936	-0.525	0.1349	0.008691
NUDT5	3.5e-05	7.458	7.988	-0.5308	0.1216	0.003374
TIMM9	7.3e-05	7.518	8.055	-0.5371	0.1288	0.004893
ZNF584	4e-05	5.03	5.57	-0.5393	0.1244	0.003571
B3GLCT	4.6e-05	5.653	6.194	-0.5406	0.1259	0.00382
SIVA1	6.2e-05	6.704	7.248	-0.5435	0.1291	0.004479
ZNF121	3.3e-05	9.071	9.624	-0.5525	0.1261	0.003288
GNPNAT1	1e-06	7.172	7.731	-0.5585	0.1064	0.000519
CPSF3	0.00014	8.333	8.894	-0.5617	0.1409	0.007284
LOC102724017	3.9e-05	5.238	5.811	-0.5732	0.1321	0.003549
SPICE1	4.1e-05	5.091	5.673	-0.582	0.1345	0.003613
POLR2H	9e-06	7.78	8.366	-0.586	0.1242	0.001703
SSR3	7e-06	7.836	8.432	-0.5963	0.1245	0.001572
MCRIP2	0.00017	6.225	6.822	-0.5974	0.152	0.008001
MTFP1	1.5e-05	5.713	6.315	-0.6024	0.1312	0.002226
CA5BP1	0.00014	6.725	7.328	-0.6037	0.1514	0.007284
ZNF107	2.4e-05	6.299	6.909	-0.6094	0.1366	0.002822
SAAL1	0.000139	6.574	7.186	-0.6118	0.1534	0.007284
ZNF616	2.8e-05	5.104	5.719	-0.6154	0.139	0.00298
RHOBTB3	0.000103	9.098	9.715	-0.6174	0.1516	0.006048
ZNF100	0.000184	4.425	5.055	-0.6299	0.1611	0.008311
LDHA	0.000239	10.48	11.12	-0.6337	0.1653	0.009614
FAM104B	6e-06	5.552	6.191	-0.6391	0.1328	0.001561
THG1L	0.000154	5.629	6.274	-0.6441	0.1626	0.007558
MRPL33	5e-05	9.16	9.812	-0.6521	0.1527	0.003997
RNF150	2.9e-05	7.501	8.162	-0.6606	0.1495	0.003058
HILPDA	0.000162	6.754	7.42	-0.6665	0.1689	0.007764
SUV39H2	0.000105	7.087	7.77	-0.6827	0.1679	0.006109
GRK5	0.000107	7.807	8.494	-0.6863	0.1689	0.006131
LOC100288675	5.5e-05	4.119	4.81	-0.6912	0.1629	0.004209
JPX	0.000106	5.249	5.945	-0.6954	0.1711	0.006109
CSRP2	0.000118	7.968	8.669	-0.701	0.1737	0.006569
CCDC34	7e-06	7.228	7.93	-0.7014	0.1471	0.001603
CNIH4	1e-06	8.815	9.521	-0.706	0.1363	0.000569
ZNF93	6e-06	6.609	7.33	-0.7215	0.1499	0.001561
LRR1	2.6e-05	6.573	7.297	-0.7235	0.1628	0.002866
LRRC6	0.000206	4.066	4.791	-0.7251	0.187	0.008954
SPG20	1.9e-05	6.975	7.701	-0.726	0.1602	0.002511
ZNF492	1e-05	4.449	5.194	-0.7454	0.1586	0.001784
TMA16	3.7e-05	5.249	6.015	-0.7662	0.1759	0.003413
HIST1H2BK	3.3e-05	7.264	8.034	-0.7695	0.1756	0.003288
PRDX4	1e-06	8.723	9.511	-0.7877	0.1519	0.000569
ZNF850	9e-06	4.989	5.797	-0.8079	0.171	0.001703
BLM	7.9e-05	6.37	7.18	-0.8104	0.1955	0.005231
AHCY	5.9e-05	8.102	8.924	-0.8214	0.1943	0.004356
NXT2	9.2e-05	6.048	6.877	-0.829	0.202	0.005756
FAH	0.000153	4.539	5.372	-0.8324	0.2101	0.007558
CKS2	0.000222	8.652	9.494	-0.8415	0.2183	0.009298
B3GNT5	0.000244	6.203	7.045	-0.8425	0.2201	0.009769
LOC101927809	0.000228	2.932	3.775	-0.8427	0.219	0.009425
LRBA	0.000109	7.795	8.659	-0.8635	0.2129	0.0062
GJC1	2e-06	8.436	9.305	-0.8688	0.1694	0.000691
SEC14L4	0.000244	2.935	3.803	-0.8688	0.2269	0.009755
MAPK13	6e-06	4.271	5.15	-0.879	0.1828	0.001569
GEN1	8.9e-05	6.362	7.266	-0.9043	0.2198	0.005571
ODC1	1e-05	9.846	10.76	-0.9158	0.1955	0.001835
LGR4	4.4e-05	5.003	5.925	-0.9217	0.214	0.003777
F12	0.000153	6.2	7.152	-0.9527	0.2405	0.007558
MND1	9.5e-05	5.65	6.603	-0.9531	0.2328	0.005794
GSTO1	<0,000001	8.659	9.629	-0.9703	0.1524	3.2e-05
KIAA0101	0.000157	8.662	9.638	-0.9769	0.247	0.007623
FEN1	0.000117	7.197	8.186	-0.9882	0.2448	0.006565
STEAP1	8.2e-05	4.468	5.457	-0.9891	0.2391	0.005341
BRIP1	0.000152	6.892	7.894	-1.002	0.2528	0.007558
FLNC	8e-06	4.266	5.282	-1.016	0.2139	0.001654
KLF15	7e-06	4.715	5.738	-1.023	0.214	0.001576
RPL22L1	0.000165	8.466	9.489	-1.023	0.2595	0.007849
PSAT1	9.9e-05	6.711	7.75	-1.039	0.2543	0.00588
HIST1H2BB	0.000181	1.772	2.837	-1.066	0.2722	0.008265
CTHRC1	0.000118	7.973	9.043	-1.07	0.2652	0.006569
CEP152	2.4e-05	6.209	7.295	-1.086	0.2431	0.002808
HERC5	9.3e-05	4.248	5.349	-1.101	0.2685	0.005758
FAM53A	2.1e-05	2.336	3.451	-1.115	0.2472	0.002515
C8orf48	<0,000001	3.697	4.832	-1.135	0.2101	0.000392
NAV2-AS4	1.3e-05	2.063	3.2	-1.137	0.246	0.002126
HIST1H2AM	0.000102	2.994	4.142	-1.148	0.2817	0.006022
PCOLCE2	5.7e-05	3.327	4.493	-1.166	0.2751	0.00426
LINC01116	1.1e-05	6.321	7.523	-1.201	0.2572	0.001889
PPEF1	8.4e-05	4.488	5.708	-1.22	0.2953	0.005443
TST	0.000236	4.93	6.151	-1.221	0.3181	0.009594
MSR1	0.000217	4.649	5.88	-1.231	0.3186	0.009172
HIST1H1C	7e-06	4.853	6.094	-1.241	0.2594	0.001572
ACOX2	4.8e-05	3.635	4.908	-1.273	0.2972	0.003899
HIST1H2AE	2.2e-05	3.847	5.142	-1.295	0.2885	0.002655
HESX1	5e-06	2.216	3.552	-1.335	0.2733	0.001322
IL17RB	0.000251	2.89	4.261	-1.371	0.3589	0.009994
USP44	7.1e-05	2.75	4.127	-1.377	0.3298	0.004845
IGSF9	6.7e-05	3.977	5.383	-1.406	0.3356	0.004745
LINC01234	0.000235	2.512	3.93	-1.417	0.3692	0.009594
PDZRN3	3.7e-05	5.142	6.589	-1.446	0.3326	0.003474
FCGR1B	3.9e-05	4.048	5.506	-1.458	0.3357	0.003543
MT1E	0.000143	5.522	6.996	-1.474	0.3701	0.007334
ASS1	4.6e-05	5.178	6.67	-1.491	0.3475	0.003826
ZNF385B	5.4e-05	1.673	3.188	-1.515	0.3564	0.00418
SHC3	1.6e-05	3.961	5.478	-1.517	0.3316	0.002254
VSIG4	2.3e-05	4.868	6.399	-1.53	0.3418	0.002754
GLDN	4e-06	2.705	4.268	-1.563	0.3159	0.001138
SLC35G1	0.000198	2.572	4.143	-1.571	0.404	0.008723
MT1H	1.5e-05	5.045	6.655	-1.61	0.3502	0.002196
STPG1	2e-05	2.232	3.853	-1.621	0.3593	0.002511
LY6E	0.000174	3.994	5.626	-1.632	0.4158	0.008063
MT1HL1	5.5e-05	5.244	6.993	-1.749	0.4118	0.004197
HK2	0.000215	3.913	5.732	-1.819	0.4706	0.009114
ABCA12	0.000111	1.553	3.422	-1.869	0.4612	0.006266
TWIST1	0.000208	5.551	7.468	-1.918	0.4949	0.008954
TMEM158	5e-06	2.119	4.095	-1.976	0.4039	0.001302
DUSP4	0.000101	3.392	5.451	-2.059	0.5047	0.00598
NTS	1.6e-05	3.062	5.199	-2.137	0.4665	0.002253
LYVE1	7e-06	3.279	5.48	-2.2	0.4582	0.001572
MIR181A2HG	6.5e-05	3.004	5.219	-2.215	0.5273	0.004616
RET	2.1e-05	3.191	5.468	-2.277	0.5053	0.002515
FGFR2	0.00014	1.617	3.942	-2.326	0.5834	0.007284
DUXAP10	2e-06	5.338	7.801	-2.462	0.4826	0.000703
RBP4	7.3e-05	1.516	4.16	-2.644	0.6346	0.00492
CLMP	<0,000001	3.07	5.719	-2.648	0.4454	0.000105
