# Supplementary material for: Two Receptors, Two Isoforms, Two Cancers: Comprehensive Analysis of KIT and TrkA Expression in Neuroblastoma and Acute Myeloid Leukemia
Source: Front Oncol. 2019 Oct 18;9:1046. doi: 10.3389/fonc.2019.01046 (PMC6813278; doi:10.3389/fonc.2019.01046)
Supplement: Supplementary Table 6 — List of primers used for real-time PCR. [file Table_6.XLSX]

## Sheet: Лист1
GAPDH pr1	GAGCCCGCAGCCTCCCGCT
GAPDH pr2	GCGCCCAATACGACCAAATC
KIT GNNK+ pr1	GCATTTAAAGGTAACAACAAAGAGC
KIT GNNK+ pr2	CTGTACTTCATACATGGGTTTCTG
KIT GNNK- pr1	CCTATTTTAACTTTGCATTTAAAGAGC
KIT GNNK- pr2	ATAATGCACATCATGCCAGCTA
TrkAI-II pr1	GGTGATGAAATCTGGGGGTCT
TrkAI-II pr2	CGTCACGTTCTTCCTGTTGAG
TrkAIII pr1	AATGCCAGCTGTGTCCCG
TrkAIII pr2	TGGTCTCATTGAGCACGGAG
NMU pr1	TGCGAACAGAGAGCTGCC
NMU pr2	TGTAGCTGTTGTTCAGGCTGT
NOS1 pr1	TTGTGGTCACCAGCACCTTT
NOS1 pr2	CGGACCTTGTAGCTCTTCCTT
GABRA5 pr1	GGTGGGCACTGAGAACATCA
GABRA5 pr2	CGTGGTGACCCCAAAAACTG
BAG3 pr1	CCCCGTTCAGGTCATCTGTC
BAG3 pr2	AGGTGCAGTTTCTCGATGGG
MARCKS pr1	GAAGAAGCCAGCATGGGTG
MARCKS pr2	TTTACCTTCACGTGGCCATTC
HOXA10 pr1	AGGTGGACGCTGCGGCTAATCTCTA
HOXA10 pr2	GCCCCTTCCGAGAGCAGCAAAG
PLXNC1 pr1	GGTCTTGAGCTTCAAATGGGC
PLXNC1 pr2	AATGGCAGTGGTCATCCGAG
MRPL33 pr1	GTGGTCACCATGTTCCTCTCC
MRPL33 pr2	TTCGCTCACCATTCTCACCAG
SLC18A2 pr1	GTCCCAGTGAAGACAAAGACCT
SLC18A2 pr2	CCCGCAAATATGGGAATTGGA
